# Supplementary material
Source: publisher figshare collection journal article supplement (https://acs.figshare.com/ndownloader/files/3787390)
Supplement: Supplementary file 1 [file 3787390]

## Supplemental Information

for

### Leaving Group Effects on the Selectivity of the Silylation of Alcohols – the Reactivity-Selectivity Principle Revisited

P. Patschinski and H. Zipse\*

#### Table of Contents

|                                                                                     |    |
|-------------------------------------------------------------------------------------|----|
| Supplemental Information.....                                                       | 1  |
| 1) Synthesis and Reagents.....                                                      | 2  |
| 1.1 Naphthalene-1-ylmethanol ( <b>4a</b> ) .....                                    | 2  |
| 1.2 <i>tert</i> -Butyldimethyl(naphthalen-1-ylmethoxy)silane ( <b>5a</b> ) .....    | 2  |
| 1.3 <i>tert</i> -Butyldimethyl(1-(naphthalen-1-yl)ethoxy)silane ( <b>5b</b> ) ..... | 3  |
| 2) Competition experiments.....                                                     | 4  |
| 2.1 Preparing the samples .....                                                     | 4  |
| 2.2 Simulation of Chemoselectivities .....                                          | 11 |
| 3) Direct Rate Measurements.....                                                    | 12 |
| 3.1 Sample preparation .....                                                        | 12 |
| 3.2 Measuring and processing .....                                                  | 12 |
| 2.3.1 Alternative options for calculating the conversion .....                      | 15 |
| 3.4 NMR shifts for reactants and products .....                                     | 17 |
| 3.5 Experimental Details for Direct Rate Measurements .....                         | 17 |
| 4) Direct Rate Measurements – Results.....                                          | 21 |
| 4.1 Time vs. conversion plots .....                                                 | 22 |
| 4.1.1 Measurements with TBSCl ( <b>1a</b> ) .....                                   | 22 |
| 4.1.2 Measurements with TBSOTf ( <b>1b</b> ) .....                                  | 39 |
| 4.1.3 Measurements with TBSCN ( <b>1c</b> ) .....                                   | 47 |
| 4.1.4 Measurements with MTBSTFA ( <b>1e</b> ) .....                                 | 59 |
| 4.1.5 Measurements with TBSImi ( <b>1d</b> ) .....                                  | 62 |
| 4.2. Possible effects of autocatalysis .....                                        | 65 |
| 5) Computational Methods.....                                                       | 67 |
| 5.1 Methods and data sheets .....                                                   | 67 |
| 5.2. Structures of all Systems .....                                                | 75 |

## 1) Synthesis and Reagents

### 1.1 Naphthalene-1-ylmethanol (**4a**)

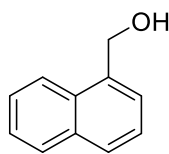

**4a**

15 mmol (0.567 g, 0.5 equivalents) of NaBH<sub>4</sub> are solved in 100 mL THF and cooled down to -10°C. 30 mmol (4.68 g, 4.07 mL, 1.0 equivalents) of 1-naphthaldehyde were dissolved in 50 mL THF and added dropwise to the solution. The reaction was allowed to stir 30 min at rt. The reaction process was monitored by TLC. The reaction was quenched by adding 2M HCl until no further H<sub>2</sub> evolved. The reaction mixture was extracted three times with DCM (20 mL) and washed with brine (20 mL). The combined organic phases were dried over MgSO<sub>4</sub> and the solvent removed under reduced pressure. A column chromatography on silica (*iso*-hexane:ethylacetate, 4:1) led to a white solid product **4a** in 95 % yield (4.50 g).

$R_f$  = 0.20 (*i*hexane/EtOAc, 4:1).

<sup>1</sup>H NMR (300 MHz, CDCl<sub>3</sub>):  $\delta$  = 2.67 (bs, 1H, OH), 5.05 (s, 2H, CH<sub>2</sub>), 7.40 - 7.61 (m, 4H), 7.81 - 7.87 (m, 1H), 7.88 - 7.96 (m, 1H), 8.03 - 8.14 (m, 1H).

<sup>13</sup>C NMR (75 MHz, CDCl<sub>3</sub>):  $\delta$  = 63.37, 123.69, 125.27, 125.88, 126.32, 128.48, 128.69, 131.25, 133.80, 136.33.

MS (EI)  $m/z$  (%) = 158.1 ([M+H]<sup>+</sup>, 83), 141.1 ([M-OH]<sup>+</sup>, 20), 129.2 ([M-CH<sub>2</sub>OH]<sup>+</sup>, 100).

HRMS (EI) C<sub>11</sub>H<sub>10</sub>O requires 158.0732 g/mol, found 158.0726 g/mol.

### 1.2 *tert*-Butyldimethyl(naphthalen-1-ylmethoxy)silane (**5a**)

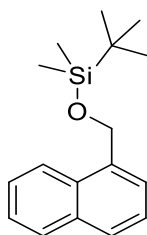

**5a**

0.32 g (2 mmol) **4a** and 0.36 g (2.4 mmol) TBSCl were dissolved in 15 mL DCM and 0.33 mL (0.24 g, 2.4 mmol) TEA was added. 0.010 g (0.08 mmol) DMAP (**6**) was added and the reaction stirred for 12 h at rt. The reaction mixture was quenched by adding NH<sub>4</sub>Cl-solution and was extracted three times with 10 mL DCM. The combined organic phases were dried over MgSO<sub>4</sub> and the solvent removed under reduced pressure. Column chromatography on silica (*iso*-hexane:DCM, 4:1) led to **5a** as a colorless oil in 82 % yield (0.44 g).

<sup>1</sup>H NMR (300 MHz, CDCl<sub>3</sub>):  $\delta$  = 0.14 (s, 6H, Si(CH<sub>2</sub>)<sub>2</sub>), 0.97 (s, 9H, Si*t*Bu), 5.22 (s, 2H, CH<sub>2</sub>), 7.59 - 7.47 (m, 3H), 7.59 - 7.61 (m, 1H), 7.79 (d,  $J$  = 8.1, 1H), 7.93 - 7.86 (m, 1H), 8.01 - 8.02 (m, 1H).

<sup>13</sup>C NMR (75 MHz, CDCl<sub>3</sub>):  $\delta$  = -5.22, 18.45, 25.95, 63.38, 123.27, 123.76, 125.44, 125.51, 125.78, 127.53, 128.58, 130.78, 133.49.

**<sup>29</sup>Si NMR** (80 MHz, CDCl<sub>3</sub>): δ = 20.58.

**MS (EI)** m/z (%) = 272.17 (0.6, [M]), 215.09 (72, [M-*t*Bu]<sup>+</sup>), 141.07 (100), [M-OTBDMS]<sup>+</sup>) 115.05 (13, [TBDMS]).

**HRMS (EI)** C<sub>17</sub>H<sub>24</sub>OSi requires 272.1596 g/mol, found 271.1590 g/mol.

### 1.3 *tert*-Butyldimethyl(1-(naphthalen-1-yl)ethoxy)silane (5b)

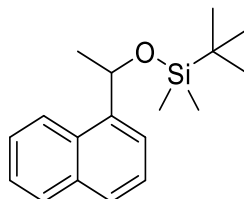

**5b**

0.35 g (2 mmol) **4b** and 0.36 g (2.4 mmol) TBSCl were dissolved in 15 mL DCM and 0.33 mL (0.24 g 2.4 mmol) TEA was added. 0.010 g (0.08 mmol) DMAP (**6**) was added and the reaction stirred for 48 h at rt. The reaction mixture was quenched by adding NH<sub>4</sub>Cl-solution and was extracted three times with 10 mL DCM. The combined organic phases were dried over MgSO<sub>4</sub> and the solvent removed under reduced pressure. Column chromatography on silica (iso-hexan:DCM, 4:1) led to **5b** as a yellowish oil in 76 % yield (0.46 g).

**<sup>1</sup>H NMR** (300 MHz, CDCl<sub>3</sub>): δ = -0.10 (s, 3H, SiCH<sub>3</sub>-*t*Bu), 0.10 (s, 3H, SiCH<sub>3</sub>-*t*Bu), 0.95 (s, 9H, (CH<sub>3</sub>)<sub>2</sub>Si-*t*Bu), 1.60 (d, J = 6.4, 3H, CH<sub>3</sub>CH-OR), 5.61 (q, J = 6.6, 1H, CH), 7.44 - 7.55 (m, 3H), 7.67 - 7.78 (m, 2H), 7.85 - 7.91 (m, 1H), 8.11 (d, J = 7.3, 1H).

**<sup>13</sup>C NMR** (75 MHz, CDCl<sub>3</sub>): δ = -4.92, -4.83, 18.30, 25.89, 26.62, 68.48, 122.67, 123.34, 125.15, 125.53, 125.57, 127.17, 128.82, 129.88.

**<sup>29</sup>Si NMR** (80 MHz, CDCl<sub>3</sub>): δ = 18.42.

**HRMS (EI)** C<sub>18</sub>H<sub>26</sub>OSi: requires 286.1753 g/mol, found: 286.1744 g/mol.

**MS (EI)** m/z (%) = 215.16 (6), 155.17 (23, [M - C<sub>6</sub>H<sub>15</sub>OSi]), 141.15 (33), 115.14 (13, [C<sub>6</sub>H<sub>15</sub>Si]), 76.09 (27, [C<sub>6</sub>H<sub>4</sub>]), 75.09 (100, [C<sub>6</sub>H<sub>3</sub>]).

## 2) Competition experiments

### 2.1 Preparing the samples

In order to achieve the needed accuracy three stock solutions have been prepared. This is necessary to guarantee the experimental reproducibility, however one should always try to minimize the number of stock solutions. The alcohols **4a** and **4b** were mixed in separate stock solutions (Stock A, B), while the silyl reagent was in a third stock solution (Stock C). Since no catalyst is needed for this reaction in DMF, no further stock solution was prepared. In Table S1 one can see the stock solutions for the silylation of **4a** and **4b**.

**Table S1.** Overview of stock solutions for competition experiment.

|                    | substance | n [mmol] | M [g/mol] | m [mg]   | c [M] |
|--------------------|-----------|----------|-----------|----------|-------|
| stock A<br>(10 mL) | <b>4a</b> | 6.6      | 158.20    | 1,044.10 | 0.66  |
| stock B<br>(10 mL) | <b>4b</b> | 6.6      | 172.23    | 1,136.69 | 0.66  |
| stock C<br>(5 mL)  | TBS-X     | 11.0     |           |          | 2.2   |

Dry DMF is stored in a glovebox over molecular sieves as well as freshly distilled Et<sub>3</sub>N. All stock solutions have been prepared in a glovebox atmosphere in order to avoid water or other impurities in the reaction mixture for the reactions in DMF. Moreover, both alcohols have been dried by washing with dry toluene and removing the solvent afterwards for several times. For the reaction in CDCl<sub>3</sub> the stock solutions have been prepared under normal laboratory conditions.

3 mL of stock A and stock B were mixed in a 25 mL flask with a magnetic stir bar and sealed with a septum. Freshly distilled Et<sub>3</sub>N was added in equimolar amounts as compared to the silyl reagent. Under steady mixing with a magnetic stirrer and temperature control with a water bath various amounts of stock C were added using a syringe pump within 15 min.

In contrast to the prior method for the reaction in chloroform DMAP (**6**) was added as catalyst in various amounts based on the amount of silyl reagent. A sample of 0.05 mL was taken and diluted with 1 mL methylene chloride and analyzed by GC, 55(0)-5-150(0)-20-280(20).

**Table S2.** Retention times of products, reactants, and side-products.

| Substance            | Retention time | Substance | Retention time |
|----------------------|----------------|-----------|----------------|
| <b>4a</b>            | 15.914         | TBSCl     | 5.015          |
| <b>4b</b>            | 15.940         | TBSOTf    |                |
| <b>5a</b>            | 16.921         | TBSCN     | 7.481          |
| <b>5b</b>            | 16.538         | MTBSTFA   | 7.940          |
| (TBS) <sub>2</sub> O | 9.340          | TBS-Imi   |                |
| DMAP                 | 13.218         |           |                |

The determination of the selectivity was performed by GC and <sup>1</sup>H NMR, if possible. The respective area factors were taken into account by measuring a calibration curve of **5a** and **5b** in different concentrations. These area factors will be used to calculate the exact ratio between both products (Figure S1, Equation S1).

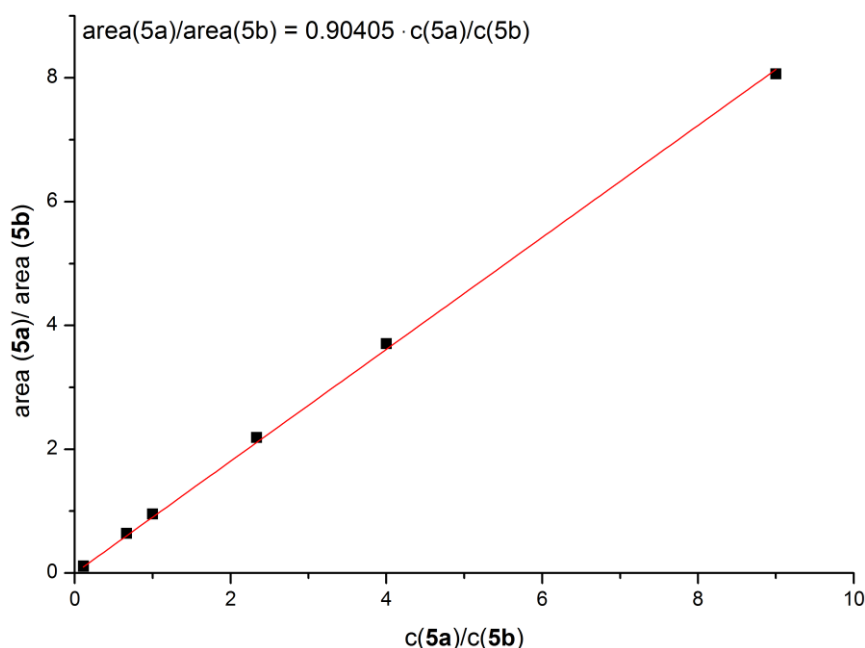

**Figure S1.** Calibration curve for GC analysis **5a** and **5b**.

The calibration curve provides equation S1, which can be easily transformed in equation S2. Using this equation one can derive the product ratio from the GC areas between **5a** and **5b**.

$$\frac{\text{area (5a)}}{\text{area (5b)}} = 0.90405 \cdot \frac{c(5a)}{c(5b)} \quad (\text{S1})$$

$$\frac{\frac{\text{area (5a)}}{\text{area (5b)}}}{0.90405} = \frac{c(5a)}{c(5b)} \quad (\text{S2})$$

The selectivity will be calculated using equation S3 by GC peak areas. For NMR measurements the concentration can be directly obtained by the integrals divided by the number of protons (S4).

$$S = \frac{[\text{Product-1}] - [\text{Product-2}]}{[\text{Product-1}] + [\text{Product-2}]} \quad (\text{S3})$$

$$S = \frac{\text{Int}_{5a}/2 - \text{Int}_{5b}/3}{\text{Int}_{5a}/2 + \text{Int}_{5b}/3} \quad (\text{S4})$$

Conversion can't be measured directly by GC measurements since **4a** and **4b** appear at almost the same retention time (Table S2). Therefore, the most accurate conversion can be obtained by NMR measurements using the signals of **4a**, **4b**, **5a**, and **5b** with equation S5.

$$\text{Conversion} = \frac{\text{Int}_{5a}/2 + \text{Int}_{5b}/3}{\text{Int}_{5a}/2 + \text{Int}_{5b}/3 + \text{Int}_{4a}/2 + \text{Int}_{4b}/3} \cdot 100\% \quad (\text{S5})$$

Since the conversion defined by experimental design is inaccurate, we obtained more accurate values by NMR measurements of the reaction mixtures. Figure S2 displays the importance of this step and the influence on the analysis of the data. We measured the relative rate of TBSCl (**1a**) with DMAP in ref. 7 separately (S=120), we take this as a value for the quality of the fit. Since it is known that the accuracy of NMR measurements when it comes to ratios of 1:100 lacks behind GC accuracy, the combination of NMR conversions and GC selectivities provides the best values for the purpose. All results for TBSCl, TBSCN, TBSOTf are listed in Table S3.

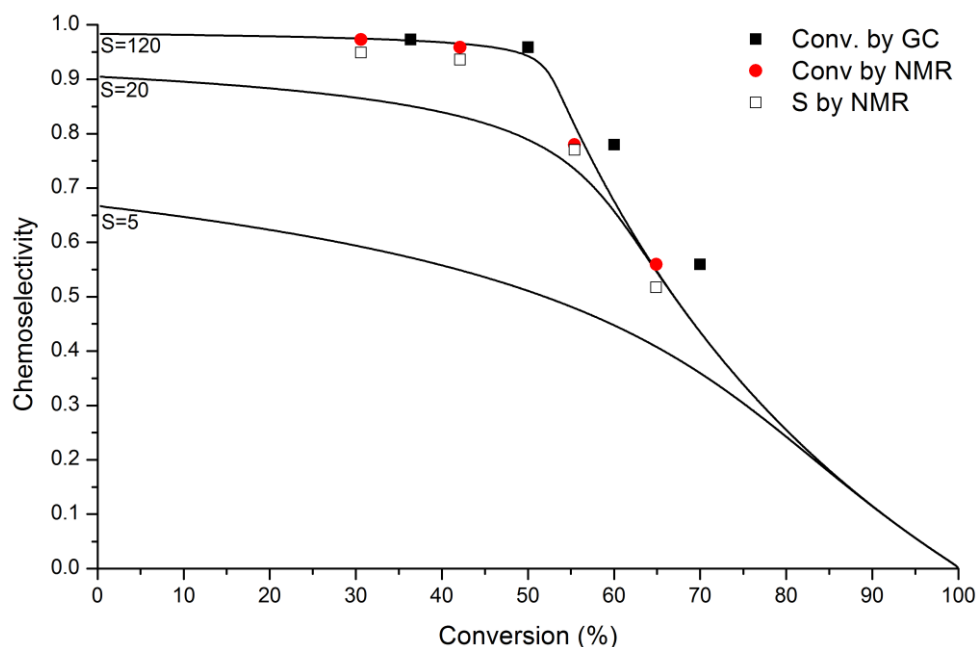

**Figure S2.** Selectivity vs conversion using various methods for data processing.

General procedure (I) for competition experiments reactions with **4a** and **4b** in various solvents: 3.0 mL of a 10 mL stock solution I (**4a**, 6.6 mmol, 1.04 g and **3**, 0.165 mmol, 16.69 mg) was mixed with 3.0 mL of a 10 mL stock solution II (**4b**, 6.6 mmol, 1.14 g and **3b**, 0.165 mmol, 16.69 mg) in a dried flask and stirred at rt. Using a syringe pump 0.6 mL of a 5 mL stock solution III (**1a-1c**, 0.825 mmol) were added over 15 min and stirred for 20 min at rt.

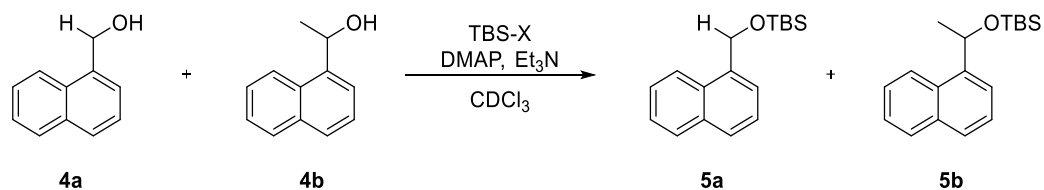

**Table S3.** Competition experiment data obtained by GC and NMR.

| Reagent               | Area (GC)<br>(5a) | Area (GC)<br>(5b) | Area<br>Factor (5a/5b) | [5a] <sub>rel</sub> | [5b] <sub>rel</sub> | Conv.<br>(Exp.) | Chemos.<br>C (GC) | Conv.<br>(NMR) | Chemos.<br>(NMR) | C |
|-----------------------|-------------------|-------------------|------------------------|---------------------|---------------------|-----------------|-------------------|----------------|------------------|---|
| <b>TBSCl<br/>(1a)</b> | 3271130           | 49755             | 0.90405                | 72.72               | 1                   | 36.4            | 0.9729            | 30.6           | 0.9486           |   |
|                       | 3013782           | 46077             |                        | 72.35               | 1                   |                 | 0.9727            | 30.5           | 0.9440           |   |
|                       | 3110997           | 46078             |                        | 74.68               | 1                   |                 | 0.9736            | 31.0           | 0.9491           |   |
|                       |                   |                   |                        |                     |                     |                 | <b>0.9731</b>     | <b>30.7</b>    | <b>0.9472</b>    |   |
|                       | 3262945           | 73489             | 0.90405                | 49.11               | 1                   | 50.0            | 0.9601            | 42.1           | 0.9356           |   |
|                       | 5935767           | 141972            |                        | 46.25               | 1                   |                 | 0.9577            | 41.9           | 0.9410           |   |
|                       | 3127003           | 73155             |                        | 47.28               | 1                   |                 | 0.9586            | 43.1           | 0.9351           |   |
|                       |                   |                   |                        |                     |                     |                 | <b>0.9588</b>     | <b>42.3</b>    | <b>0.9372</b>    |   |
|                       | 10909491          | 1494539           | 0.90405                | 8.07                | 1                   | 60.1            | 0.7796            | 55.4           | 0.7699           |   |
|                       | 10372739          | 1429864           |                        | 8.02                | 1                   |                 | 0.7784            | 55.5           | 0.7616           |   |
|                       | 9319756           | 1266785           |                        | 8.14                | 1                   |                 | 0.7811            | 55.6           | 0.7684           |   |
|                       |                   |                   |                        |                     |                     |                 | <b>0.7797</b>     | <b>55.5</b>    | <b>0.7666</b>    |   |
|                       | 5639899           | 1623987           | 0.90405                | 3.84                | 1                   | 70.0            | 0.5869            | 64.1           | 0.5167           |   |
|                       | 11982143          | 3910565           |                        | 3.39                | 1                   |                 | 0.5443            | 64.9           | 0.5267           |   |
|                       | 8550272           | 2770864           |                        | 3.41                | 1                   |                 | 0.5468            | 63.9           | 0.5186           |   |
|                       |                   |                   |                        |                     |                     |                 | <b>0.5594</b>     | <b>64.3</b>    | <b>0.5207</b>    |   |
| <b>TBSCN<br/>(1c)</b> | 2420909           | 19909             | 0.90405                | 134.50              | 1                   | 40.0            | 0.9852            | 30.9           | 0.9530           |   |
|                       | 3955832           | 38963             |                        | 112.30              | 1                   |                 | 0.9823            | 31.1           | 0.9541           |   |
|                       | 3513931           | 34585             |                        | 112.39              | 1                   |                 | 0.9824            | 32.0           | 0.9642           |   |
|                       |                   |                   |                        |                     |                     |                 | <b>0.9833</b>     | <b>31.4</b>    | <b>0.9570</b>    |   |
|                       | 2723427           | 25828             | 0.90405                | 116.64              | 1                   | 50.0            | 0.9830            | 39.6           | 0.9535           |   |
|                       | 2682127           | 35539             |                        | 83.48               | 1                   |                 | 0.9763            | 39.9           | 0.9526           |   |
|                       | 4299545           | 57642             |                        | 82.51               | 1                   |                 | 0.9760            | 39.9           | 0.9550           |   |
|                       |                   |                   |                        |                     |                     |                 | <b>0.9785</b>     | <b>39.8</b>    | <b>0.9537</b>    |   |
|                       | 6864167           | 193285            | 0.90405                | 39.28               | 1                   | 60.1            | 0.9504            | 44.3           | 0.9305           |   |
|                       | 32129521          | 1081725           |                        | 32.85               | 1                   |                 | 0.9409            | 47.0           | 0.9023           |   |
|                       | 14415068          | 349263            |                        | 45.65               | 1                   |                 | 0.9571            | 45.8           | 0.9150           |   |
|                       |                   |                   |                        |                     |                     |                 | <b>0.9495</b>     | <b>45.7</b>    | <b>0.9159</b>    |   |
|                       | 4989709           | 266864            | 0.90405                | 20.68               | 1                   | 70.0            | 0.9078            | 54.8           | 0.7562           |   |
|                       | 10167793          | 737146            |                        | 15.26               | 1                   |                 | 0.8770            | 54.4           | 0.7689           |   |
|                       | 11312752          | 818258            |                        | 15.29               | 1                   |                 | 0.8772            | 54.8           | 0.7564           |   |
|                       |                   |                   |                        |                     |                     |                 | <b>0.8873</b>     | <b>54.7</b>    | <b>0.7605</b>    |   |

| Reagent                                                               | Area (GC)<br>(5a) | Area (GC)<br>(5b) | Area<br>Factor (5a/5b) | [5a] <sub>rel</sub> | [5b] <sub>rel</sub> | Conv.<br>(Exp.) | Chemos.<br>C (GC) | Conv.<br>(NMR) | Chemos. C<br>(NMR) |
|-----------------------------------------------------------------------|-------------------|-------------------|------------------------|---------------------|---------------------|-----------------|-------------------|----------------|--------------------|
| <b>TBSOTf</b><br><b>(1b, CDCl<sub>3</sub>)</b>                        | 3064483           | 1016373           | 0.90405                | 3.34                | 1                   | 40              | 0.5387            | 31.2           | 0.5008             |
|                                                                       | 2205348           | 846208            |                        | 2.88                | 1                   |                 | 0.4849            | 31.0           | 0.5311             |
|                                                                       | 2136966           | 699012            |                        | 3.38                | 1                   |                 | 0.5435            | 31.5           | 0.5114             |
|                                                                       |                   |                   |                        |                     |                     |                 | <b>0.5224</b>     | <b>31.2</b>    | <b>0.5144</b>      |
|                                                                       | 2928638           | 1052831           | 0.90405                | 3.08                | 1                   | 50              | 0.5094            | 38.9           | 0.5263             |
|                                                                       | 5721449           | 2096360           |                        | 3.02                | 1                   |                 | 0.5024            | 42.6           | 0.3070             |
|                                                                       | 3877309           | 1310266           |                        | 3.27                | 1                   |                 | 0.5320            | 38.0           | 0.2076             |
|                                                                       |                   |                   |                        |                     |                     |                 | <b>0.5146</b>     | <b>39.8</b>    | <b>0.3470</b>      |
|                                                                       | 4516043           | 2111322           | 0.90405                | 2.37                | 1                   | 60              | 0.4058            | 47.3           | 0.8499             |
|                                                                       | 3334781           | 1433377           |                        | 2.57                | 1                   |                 | 0.4403            | 50.4           | 0.1426             |
|                                                                       | 3040793           | 1277113           |                        | 2.63                | 1                   |                 | 0.4496            | 50.3           | 0.2095             |
|                                                                       |                   |                   |                        |                     |                     |                 | <b>0.4319</b>     | <b>49.3</b>    | <b>0.4006</b>      |
|                                                                       | 3369721           | 1720945           | 0.90405                | 2.17                | 1                   | 70              | 0.3683            | 63.3           | 0.3045             |
|                                                                       | 4009721           | 1920945           |                        | 2.31                | 1                   |                 | 0.3956            | 63.6           | 0.3305             |
|                                                                       | 3379721           | 1760945           |                        | 2.12                | 1                   |                 | 0.3596            | 63.4           | 0.3311             |
|                                                                       |                   |                   |                        |                     |                     |                 | <b>0.3745</b>     | <b>63.4</b>    | <b>0.3221</b>      |
| <b>TBSCl</b><br><b>(1a, DMF)</b>                                      | 1725017           | 131078            | 0.90405                | 14.56               | 1                   | 30              | 0.8714            | n.d.           | n.d.               |
|                                                                       | 1342632           | 97404             |                        | 15.25               | 1                   |                 | 0.8769            |                |                    |
|                                                                       | 1835639           | 159008            |                        | 12.77               | 1                   |                 | 0.8548            |                |                    |
|                                                                       | 1849493           | 157898            |                        | 12.96               | 1                   |                 | 0.8567            |                |                    |
|                                                                       |                   |                   |                        |                     |                     |                 | <b>0.8649</b>     |                |                    |
|                                                                       | 3337973           | 346086            | 0.90405                | 10.67               | 1                   | 40              | 0.8286            | n.d.           | n.d.               |
|                                                                       | 3514745           | 355260            |                        | 10.94               | 1                   |                 | 0.8325            |                |                    |
|                                                                       | 3106008           | 288116            |                        | 11.92               | 1                   |                 | 0.8453            |                |                    |
|                                                                       |                   |                   |                        |                     |                     |                 | <b>0.8355</b>     |                |                    |
|                                                                       | 3951097           | 498093            | 0.90405                | 8.77                | 1                   | 50              | 0.7954            | n.d.           | n.d.               |
|                                                                       | 3641637           | 444840            |                        | 9.06                | 1                   |                 | 0.8011            |                |                    |
|                                                                       | 4802772           | 639736            |                        | 8.30                | 1                   |                 | 0.7850            |                |                    |
|                                                                       |                   |                   |                        |                     |                     |                 | <b>0.7938</b>     |                |                    |
|                                                                       | 7864588           | 1410043           | 0.90405                | 6.17                | 1                   | 60              | 0.7210            | n.d.           | n.d.               |
|                                                                       | 4634963           | 815327            |                        | 6.29                | 1                   |                 | 0.7256            |                |                    |
|                                                                       | 5487605           | 1085751           |                        | 5.59                | 1                   |                 | 0.6965            |                |                    |
|                                                                       |                   |                   |                        |                     |                     |                 | <b>0.7144</b>     |                |                    |
| <b>TBSOTf</b><br><b>(1b, CD<sub>2</sub>Cl<sub>2</sub>,<br/>20 °C)</b> | 3877309           | 1310266           | 0.90405                | 3.27                | 1                   | 40              | 0.5320            | 33.7           | 0.5610             |
|                                                                       | 2109572           | 610874            |                        | 3.82                | 1                   |                 | 0.5851            | 33.7           | 0.5353             |
|                                                                       | 5721449           | 2096360           |                        | 3.02                | 1                   |                 | 0.5024            | 34.0           | 0.5263             |
|                                                                       |                   |                   |                        |                     |                     |                 | <b>0.5398</b>     | <b>33.8</b>    | <b>0.5409</b>      |
|                                                                       | 2821575           | 968452            | 0.90405                | 3.22                | 1                   | 50              | 0.5264            | 42.1           | 0.3741             |
|                                                                       | 2146966           | 835012            |                        | 2.84                | 1                   |                 | 0.4797            | 42.8           | 0.3699             |
|                                                                       | 2172964           | 781920            |                        | 3.07                |                     |                 | 0.5091            | 44.1           | 0.3789             |



| Reagent                                                                | Area (GC)<br>(5a) | Area (GC)<br>(5b) | Area<br>Factor (5a/5b) | [5a] <sub>rel</sub> | [5b] <sub>rel</sub> | Conv.<br>(Exp.) | Chemos.<br>C (GC) | Conv.<br>(NMR) | Chemos. C<br>(NMR) |
|------------------------------------------------------------------------|-------------------|-------------------|------------------------|---------------------|---------------------|-----------------|-------------------|----------------|--------------------|
|                                                                        |                   |                   |                        |                     | 1                   |                 | <b>0.5051</b>     | <b>43.0</b>    | <b>0.3743</b>      |
|                                                                        | 2226409           | 1042608           | 0.90405                | 2.36                | 1                   | 60              | 0.4051            | 54.7           | 0.2934             |
|                                                                        | 4503490           | 2014975           |                        | 2.47                | 1                   |                 | 0.4240            | 53.7           | 0.2857             |
|                                                                        | 3294765           | 1423378           |                        | 2.56                | 1                   |                 | 0.4383            | 53.2           | 0.2914             |
|                                                                        |                   |                   |                        |                     |                     |                 | <b>0.4225</b>     | <b>53.9</b>    | <b>0.2902</b>      |
|                                                                        | 3398191           | 1589807           | 0.90405                | 2.36                | 1                   | 70              | 0.4055            | 61.2           | 0.3123             |
|                                                                        | 2145548           | 1050455           |                        | 2.26                | 1                   |                 | 0.3864            | 60.1           | 0.3003             |
|                                                                        | 2300275           | 1005665           |                        | 2.53                | 1                   |                 | 0.4334            | 60.3           | 0.3070             |
|                                                                        |                   |                   |                        |                     |                     |                 | <b>0.4084</b>     | <b>60.6</b>    | <b>0.3066</b>      |
| <b>TBSOTf</b><br><b>(1b, CD<sub>2</sub>Cl<sub>2</sub>,<br/>0 °C)</b>   | 1968637           | 529002            | 0.90405                | 4.12                | 1                   | 40              | 0.6091            | 33.71          | 0.246              |
|                                                                        | 3414660           | 776490            |                        | 4.86                | 1                   |                 | 0.6590            | 35.52          | 0.686              |
|                                                                        | 1971526           | 473710            |                        | 4.60                | 1                   |                 | 0.6431            | 29.29          | 0.221              |
|                                                                        |                   |                   |                        |                     |                     |                 | <b>0.6370</b>     | <b>32.84</b>   | <b>0.384</b>       |
|                                                                        | 1571940           | 434591            | 0.90405                | 4.00                | 1                   | 50              | 0.6001            | 43.20          | 0.486              |
|                                                                        | 1489603           | 454630            |                        | 3.62                | 1                   |                 | 0.5675            | 44.90          | 0.588              |
|                                                                        | 1591084           | 536331            |                        | 3.28                | 1                   |                 | 0.5329            | 43.78          | 0.454              |
|                                                                        |                   |                   |                        |                     |                     |                 | <b>0.5668</b>     | <b>43.96</b>   | <b>0.509</b>       |
|                                                                        | 2618088           | 823791            | 0.90405                | 3.52                | 1                   | 60              | 0.5571            | 52.90          | 0.392              |
|                                                                        | 2530339           | 886079            |                        | 3.16                | 1                   |                 | 0.5191            | 53.68          | 0.374              |
|                                                                        | 2721691           | 833146            |                        | 3.61                | 1                   |                 | 0.5665            | 53.69          | 0.385              |
|                                                                        |                   |                   |                        |                     |                     |                 | <b>0.5475</b>     | <b>53.43</b>   | <b>0.384</b>       |
|                                                                        | 3040109           | 1101499           | 0.90405                | 3.05                | 1                   | 70              | 0.5065            | 61.70          | 0.378              |
|                                                                        | 3257844           | 1469260           |                        | 2.45                | 1                   |                 | 0.4207            | 62.69          | 0.284              |
|                                                                        | 3531648           | 1486161           |                        | 2.63                | 1                   |                 | 0.4488            | 61.79          | 0.368              |
|                                                                        |                   |                   |                        |                     |                     |                 | <b>0.4587</b>     | <b>62.06</b>   | <b>0.343</b>       |
| <b>TBSOTf</b><br><b>(1b, CD<sub>2</sub>Cl<sub>2</sub>,<br/>-78 °C)</b> | 1727894           | 194665            | 0.90405                | 9.82                | 1                   | 40              | 0.8151            | 35.7           | 0.6681             |
|                                                                        | 2598820           | 341024            |                        | 8.43                | 1                   |                 | 0.7879            | 35.5           | 0.6858             |
|                                                                        | 1180213           | 119161            |                        | 10.96               | 1                   |                 | 0.8327            | 35.4           | 0.6551             |
|                                                                        |                   |                   |                        |                     |                     |                 | <b>0.8119</b>     | <b>35.5</b>    | <b>0.6696</b>      |
|                                                                        | 3849275           | 566426            | 0.90405                | 7.52                | 1                   | 50              | 0.7652            | 45.4           | 0.5809             |
|                                                                        | 3750990           | 557297            |                        | 7.45                | 1                   |                 | 0.7632            | 44.9           | 0.5876             |
|                                                                        | 3172248           | 518087            |                        | 6.77                | 1                   |                 | 0.7427            | 45.1           | 0.5715             |
|                                                                        |                   |                   |                        |                     |                     |                 | <b>0.7570</b>     | <b>45.1</b>    | <b>0.5800</b>      |
|                                                                        | 2671220           | 469236            | 0.90405                | 6.30                | 1                   | 60              | 0.7259            | 56.8           | 0.3523             |
|                                                                        | 2930228           | 533476            |                        | 6.08                | 1                   |                 | 0.7173            | 56.2           | 0.3698             |
|                                                                        | 1897181           | 449518            |                        | 4.67                | 1                   |                 | 0.6472            | 56.8           | 0.3487             |
|                                                                        |                   |                   |                        |                     |                     |                 | <b>0.6968</b>     | <b>56.6</b>    | <b>0.3569</b>      |
|                                                                        | 4818607           | 1442983           | 0.90405                | 3.69                | 1                   | 70              | 0.5739            | 62.8           | 0.2675             |
|                                                                        | 4868159           | 1376218           |                        | 3.91                | 1                   |                 | 0.5929            | 62.7           | 0.2845             |

| Reagent | Area (GC)<br>( <b>5a</b> ) | Area (GC)<br>( <b>5b</b> ) | Area<br>Factor ( <b>5a/5b</b> ) | [ <b>5a</b> ] <sub>rel</sub> | [ <b>5b</b> ] <sub>rel</sub> | Conv.<br>(Exp.) | Chemos.<br>C (GC)       | Conv.<br>(NMR)      | Chemos.<br>(NMR)        | C |
|---------|----------------------------|----------------------------|---------------------------------|------------------------------|------------------------------|-----------------|-------------------------|---------------------|-------------------------|---|
|         | 4778726                    | 1467228                    |                                 | 3.60                         | 1                            |                 | 0.5655<br><b>0.5774</b> | 63.1<br><b>62.9</b> | 0.2697<br><b>0.2739</b> |   |

## 2.2 Simulation of Chemoselectivities

With the help of CoPaSi<sup>[4]</sup> the S-values for the competition experiments have been simulated. Shown in Figure S3 are the used reactions, in which the k-values have been modified in order to achieve the S-values. The values  $k_1$ ,  $k_{-1}$ , and  $k_3$  were used as constants, while  $k_{\text{prim}}$  and  $k_{\text{sec}}$  have been changed.

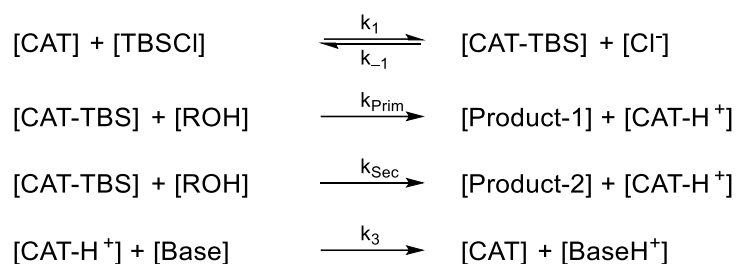

**Figure S3** Reaction equations for the simulation with CoPaSi.

The conversion was calculated based on the used silyl reagent and the selectivity following equation (S31). Shown in Figure S4 are the selectivity curves for this generalized reaction scheme.

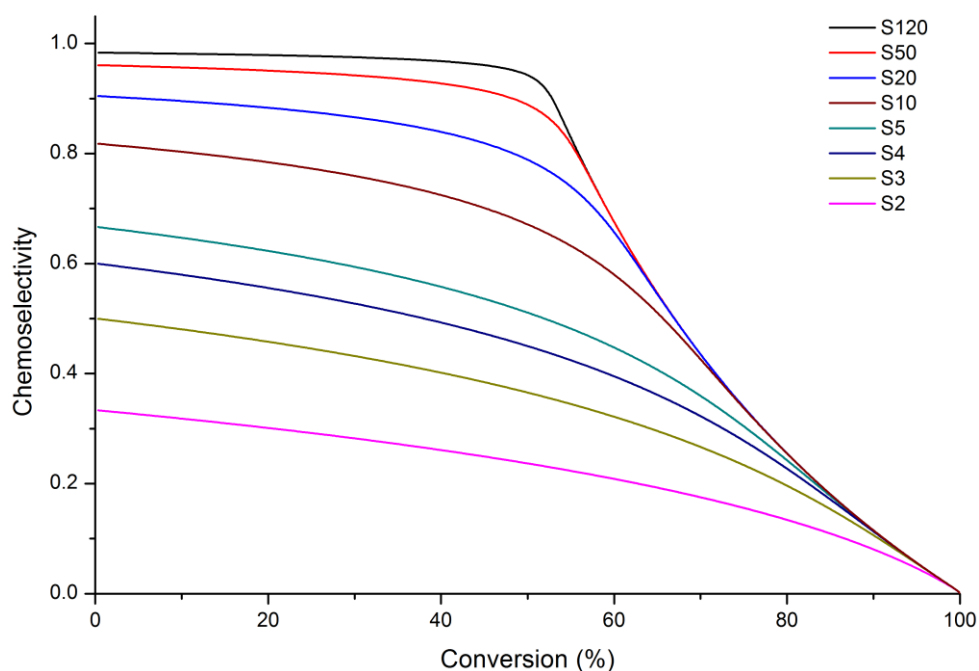

**Figure S4** Selectivity curves a competition reaction.

### 3) Direct Rate Measurements

#### 3.1 Sample preparation

Stock solutions of the relevant compounds have been prepared as shown in Table S4. For the NMR experiments three stock solutions have been prepared with freshly distilled  $\text{CDCl}_3$ . For the measurements in  $\text{DMF-d}_7$  the stock solutions were prepared under glovebox conditions.

**Table S4.** Overview of stock solutions for kinetic measurements. The concentration of the catalyst can be changed if necessary.

|         | substance             | n [mmol] | m [g] | Volume [mL] | c [M] | equiv. |
|---------|-----------------------|----------|-------|-------------|-------|--------|
| stock A | TBS-X                 | 3.6      | 0.542 |             | 0.72  | 1.2    |
|         | Dioxane               | 1.0      | 0.088 | 0.086       | 0.2   | 0.33   |
| stock B | $\text{Et}_3\text{N}$ | 3.6      | 0.364 | 0.498       | 0.72  | 1.2    |
|         | <b>4a</b>             | 3.0      | 0.475 |             | 0.6   | 1.0    |
| stock C | Cat                   | 0.12     | 0.015 |             | 0.024 |        |

$\text{CDCl}_3$  and  $\text{Et}_3\text{N}$  were freshly distilled under  $\text{N}_2$  from  $\text{CaH}_2$  before preparing the stock solutions. NMR tubes have been dried under vacuum using a special apparatus and flushed with  $\text{N}_2$  three times to eliminate water. 200  $\mu\text{L}$  of each stock solution are then transferred using a Hamilton syringe or a 200  $\mu\text{L}$  Eppendorf pipette to the NMR tube, which is closed with a cap and sealed with parafilm. In case of long reaction times ( $t_{1/2} > 400$  min) the tube is flame-sealed

#### 3.2 Measuring and processing

The samples were sealed and have been measured at the same machine (200 MHz NMR) using 32 cycles at 23°C. For longer reaction times the samples have been constantly shaken mechanically. At least ten data points should be determined for an accurate time-conversion curve and were processed with the program MestReNova 9.1. First of all one compares the integrals of the reactant and the product in all measured NMR spectra. Furthermore, the reaction time at the point of measuring this specific NMR is recorded. For a better understanding a typical NMR spectrum for the silylation of **4a** with **1a** is depicted in Figure S5.

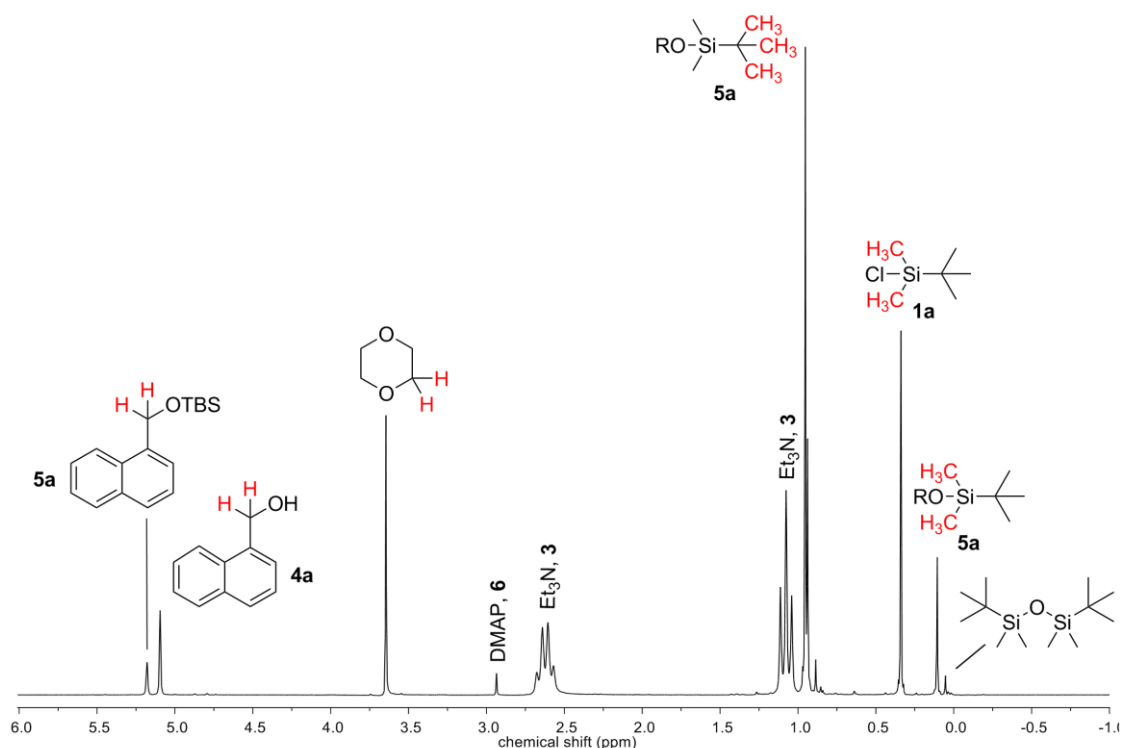

**Figure S5**  $^1\text{H}$  NMR spectrum of the benchmark reaction in  $\text{CDCl}_3$  using the primary alcohol **4a**, **3b** as the auxiliary base, and DMAP as the catalyst.

All spectra were imported in MestReNova and the subsequent steps have been carried out: Apodization, exponential 0.1; Baseline Correction, Bernstein polynomial fit; Phase correction, Auto (Global Method). In order to calculate the conversion from the integrals, equation S1 was used. One has to multiply either with 100 % in case of the alcohol **5a** signals or with 120 % in case of the TBDMS signals. This set of data is based on TBDMS signals and is therefore multiplied with 120%.

$$\text{conversion} = \frac{I_{\text{TBDMSOR}}}{\sum I_{\text{TBDMSOR}} + I_{\text{TBDMSCI}}} \cdot 120 \% \quad (\text{S6})$$

The plots have been prepared with OriginPro 8. For the plot of conversion  $y$  versus reaction time one can easily fit different integrated rate laws. Before fitting the data one has to choose, which kinetic rate law is most suitable for this type of reaction. On the following pages several rate laws will be shown and the best one will be used for fitting.

The plots of conversion versus time were fitted with equation (S7), where  $y_0$  is the conversion at infinite time of reaction,  $t_0$  is the starting point of the reaction, and  $k_{\text{eff}}$  the rate of the reaction.

$$\text{conversion} = y_0 \cdot \left[ 1 - \frac{0.2}{1.2 e^{k_{\text{eff}}(0.2)(t-t_0)} - 1} \right] \quad (\text{S7})$$

A half-life can be calculated with equation (S8):

$$t_{1/2} = \frac{\ln(1.166)}{0.2 \cdot k_{eff}} \quad (\text{S8})$$

Previous equations are based on a modified second order rate law. The silylation of alcohol **5a** requires a silylating reagent (TBDMSCl, **1a**) as a reaction partner. By assuming that during the reaction the concentration of the catalyst is constant and that triethylamine (**2**) does not participate at all in the rate determining step, the following equation for the second-order reaction can be written:

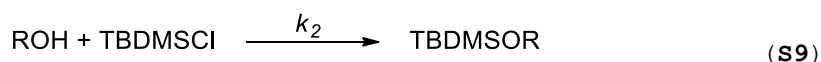

The rate law for a second-order reaction is shown in equation S9.

$$-\frac{d[\text{ROH}]}{dt} = k_2 \cdot [\text{ROH}] \cdot [\text{TBDMSCl}] \quad (\text{S10})$$

Since there is no one to one ratio in this reaction one has to take the actual ratio of reactants into account. The ratio at the beginning of the reaction between both reactants is important for the further proceeding and is expressed in equation S11.

$$\frac{[\text{TBDMSCl}]_0}{[\text{ROH}]_0} = n \quad (n > 1) \quad (\text{S11})$$

Furthermore, the concentrations of the alcohol can be expressed from the conversion and the initial concentration  $[\text{ROH}]_0$ . If the ratio of the initial concentrations of alcohol and TBDMSCl is assumed to be  $n$  (eq. S11), then the concentration of TBDMSCl can be expressed by equation S13.

$$[\text{ROH}] = [\text{ROH}]_0 \cdot (1-y) \quad (\text{S12})$$

$$[\text{TBDMSCl}] = [\text{ROH}]_0 \cdot (n-y) \quad (\text{S13})$$

By taking equation S12 and S13 into account, the effective rate law can be written as:

$$-[\text{ROH}]_0 \frac{d(1-y)}{dt} = k_2 \cdot [\text{ROH}]_0^2 (1-y)(n-y) \quad (\text{S14})$$

Rearranging the variables under the condition that  $k_{eff} = k_2[\text{ROH}]_0$  leads to equation S15.

$$\frac{d(1-y)}{(1-y)(n-y)} = -k_{eff} \cdot dt \quad (\text{S15})$$

Integration and several transformations of equation S15 leads to equation S21.

$$\int_0^y \frac{d(1-y)}{(1-y)(n-y)} = - \int_{t_0}^t k_{\text{eff}} \cdot dt \quad (\text{S16})$$

$$\frac{1}{(1-y)(n-y)} = \left( \frac{1}{1-y} - \frac{1}{n-y} \right) / (n-1) \quad (\text{S17})$$

$$\ln \left( \frac{1}{1-y} \right) - \ln \left( \frac{n}{n-y} \right) = - (n-1) \cdot k_{\text{eff}} \cdot (t-t_0) \quad (\text{S18})$$

$$\ln \left( \frac{n-y}{n \cdot (1-y)} \right) = - (n-1) \cdot k_{\text{eff}} \cdot (t-t_0) \quad (\text{S19})$$

$$\frac{n-y}{n \cdot (1-y)} = e^{k_{\text{eff}} \cdot (n-1) \cdot (t-t_0)} \quad (\text{S20})$$

$$y = 1 - \frac{n-1}{n \cdot e^{k_{\text{eff}} \cdot (n-1) \cdot (t-t_0)} - 1} \quad (\text{S21})$$

Equation **S21** expresses the conversion for the ideal second-order reaction, but only works for  $n > 1$ . For kinetic measurements it is necessary to take errors of preparing and mixing the samples into account. This can be achieved by adding another variable  $y_0$ , which acts as conversion axis rescaling parameter. The final equation is given below by equation **S22**:

$$y = y_0 \cdot \left( 1 - \frac{n-1}{n \cdot e^{k_{\text{eff}} \cdot (n-1) \cdot (t-t_0)} - 1} \right) \quad (\text{S22})$$

For the silylation of an alcohol the silylation reagent (**1a**, TBSCl) is used in 1.2 equivalents which leads to equation **S7**.

In order to get a half-life time from this results the general equation **S22** is used.

$$t_{1/2} = \frac{\ln \frac{2n-1}{n}}{(n-1) \cdot k_{\text{eff}}} \quad (\text{S22})$$

Since the ratio ( $n$ ) between ROH and TBDMSCl is known to be 1.2, one can change this equation to equation **S8**.

On the following pages all plots which are used for this publication are shown in the order of their appearance.

### 2.3.1 Alternative options for calculating the conversion

As shown before the conversion can be calculated by using the signals of TBDMSCl (**1a**) and the product. In addition the signal of the alcohol can be used in a similar way (**S19**).

$$\text{conversion} = \frac{I_{\text{TBDMSOR}}}{\Sigma I_{\text{TBDMSOR}} + I_{\text{ROH}}} \cdot 100 \% \quad (\text{S24})$$

Another way is to use the specific ratios of TBDMSCl (**1a**) and alcohol to calculate the conversion. Moreover, the external standard dioxane can be used. The ratios are: TBDMSCl/ROH = 1.2, TBDMSCl/dioxane = 3.6, and

TBDMSOR/Dioxane =3.0. By using these ratios and the concentrations and not only the integrals one can easily build up the following equations.

$$\text{conversion} = \frac{[\text{ROH}]_0 - [\text{ROH}]}{[\text{ROH}]_0} \cdot 100 \% \quad (\text{S25})$$

$$\text{conversion} = \frac{[\text{TBDMSCl}]_0 - [\text{TBDMSOR}]}{[\text{ROH}]_0} \cdot 100 \% \quad (\text{S26})$$

$$\text{conversion} = \frac{[\text{TBDMSCl}]_0 - [\text{TBDMSOR}]}{1/1.2 [\text{TBDMSCl}]_0} \cdot 100 \% \quad (\text{S27})$$

$$\text{conversion} = \left[ 1.2 - 1.2 \cdot \frac{[\text{TBDMSOR}] / [\text{dioxane}]_0}{[\text{TBDMSCl}]_0 / [\text{dioxane}]_0} \right] \cdot 100 \% \quad (\text{S28})$$

By using the integrals and the amount of protons each signal has the equations **S29** and **S30** can be built for the decrease of the TBDMSCl or alcohol signal.

$$\text{conversion} = \left[ 1.2 - 1.2 \cdot \frac{I_{\text{TBDMSCl}} / 6}{I_{\text{dioxane}} / 8} / 3.6 \right] \cdot 100 \% \quad (\text{S29})$$

$$\text{conversion} = \left[ 1.2 - 1.2 \cdot \frac{I_{\text{HOR}} / 2}{I_{\text{dioxane}} / 8} / 3.0 \right] \cdot 100 \% \quad (\text{S30})$$

The second alternative is to use the increasing signals of the product either the TBDMS- (**S31**) or the alcohol-based (**S32**) signals.

$$\text{conversion} = \left[ \frac{I_{\text{TBDMSOR}} / 6}{I_{\text{dioxane}} / 8} / 3.0 \right] \cdot 100 \% \quad (\text{S31})$$

$$\text{conversion} = \left[ \frac{I_{\text{ROTBDS}} / 2}{I_{\text{dioxane}} / 8} / 3.0 \right] \cdot 100 \% \quad (\text{S32})$$

A very carefully comparison of all options came to the conclusion that using the integral ratios of TBDMS as defined in eq. (**S6**) is the best choice. The alcohol signals tend to overlap in some of the kinetics runs. The reproducibility of the results using the external standard is lower as compared to that for eq. (**S6**).



### 3.4 NMR shifts for reactants and products

For a better overview we here provide all spectroscopic data of reactants and products in Table S5.

**Table S5.**  $^1\text{H}$ ,  $^{13}\text{C}$ , and  $^{29}\text{Si}$  NMR chemical shifts of silicon-containing reactants and products [ppm, in  $\text{CDCl}_3$ ].

| Structures                                                                          | $^{29}\text{Si}$ | $^1\text{H}$                                                                                                                                                                                                                                                                          | $^{13}\text{C}$                                                                                                      |
|-------------------------------------------------------------------------------------|------------------|---------------------------------------------------------------------------------------------------------------------------------------------------------------------------------------------------------------------------------------------------------------------------------------|----------------------------------------------------------------------------------------------------------------------|
| 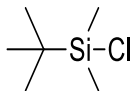   | 36.12            | 0.98 (s, 9H, tBu),<br>0.37 <sup>[1]</sup> (s, 6H, Si(CH <sub>3</sub> ) <sub>2</sub> )                                                                                                                                                                                                 | 25.60, 19.06, -1.54                                                                                                  |
|    | 43.84            | 1.00 (s, 9H, tBu),<br>0.45 <sup>[1]</sup> (s, 6H, Si(CH <sub>3</sub> ) <sub>2</sub> )                                                                                                                                                                                                 | 118.57 (q, $J=317.4$ ),<br>24.80, 18.20, -4.23                                                                       |
|    | 26.69            | 3.07 (s, 3H, CH <sub>3</sub> ),<br>0.99 (s, 9H, Bu),<br>0.26 <sup>[1]</sup> (s, 6H, Si(CH <sub>3</sub> ) <sub>2</sub> )                                                                                                                                                               | 117.18 (q, $J=277.9$ ),<br>144.48 (q, $J=37.6$ ),<br>34.39, 27.04, 25.58,<br>18.71, -3.95                            |
|    | 17.26            | 7.54, 7.15, 6.92,<br>0.88 (s, 9H, tBu),<br>0.43 <sup>[1]</sup> (s, 6H, Si(CH <sub>3</sub> ) <sub>2</sub> )                                                                                                                                                                            | 140.86, 130.48,<br>120.93, 25.66,<br>17.83, -5.38                                                                    |
|    | -1.52            | 1.01 (s, 9H, tBu),<br>0.29 <sup>[1]</sup> (s, 6H, Si(CH <sub>3</sub> ) <sub>2</sub> )                                                                                                                                                                                                 | 126.11, 25.65, 16.31,<br>-5.92,                                                                                      |
|   | 9.91             | 0.85 (s, 18H, tBu),<br>0.00 (s, 12H, Si(CH <sub>3</sub> ) <sub>2</sub> )                                                                                                                                                                                                              |                                                                                                                      |
|  | 18.42            | - 0.01 (s, 3H, Si(CH <sub>3</sub> )),<br>0.10 <sup>[1]</sup> (s, 3H, Si(CH <sub>3</sub> )),<br>0.95 (s, 9H, tBu),<br>1.60 (d, $J=6.4$ , 3H, MeCH-OR),<br>5.61 (q, $J = 6.6$ , 1H, CH),<br>7.44-7.55 (m, 3H),<br>7.67-7.78 (m, 2H),<br>7.85-7.91 (m, 1H),<br>8.11 (d, $J = 7.3$ , 1H). | 129.88, 128.82, 127.17,<br>125.57, 125.53, 125.15,<br>123.34, 122.67, 68.48,<br>26.62, 25.89, 18.30,<br>-4.83, -4.92 |
|  | 20.58            | 0.14 <sup>[1]</sup> (s, 6H, Si(CH <sub>3</sub> ) <sub>2</sub> ),<br>0.97 (s, 9H, tBu),<br>5.22 (s, 2H, CH <sub>2</sub> ),<br>7.47 - 7.59 (m, 3H),<br>7.59 - 7.61 (m, 1H),<br>7.79 (d, $J = 8.1$ , 1H),<br>7.86 - 7.93 (m, 1H),<br>8.00 - 8.05 (m, 1H).                                | 128.57, 127.54, 125.79,<br>125.51, 125.45, 123.77,<br>123.27, 63.39, 29.17,<br>25.98, 18.46, -5.22                   |

<sup>[1]</sup>Used for integration in NMR kinetic measurements.

### 3.5 Experimental Details for Direct Rate Measurements

All air and water sensitive manipulations were carried out under a nitrogen atmosphere using standard Schlenk techniques. Calibrated flasks for kinetic measurements were dried in the oven at 120 °C for at least 12 hours prior to use and then assembled quickly while still hot, cooled under a nitrogen stream and sealed with a rubber septum. Hygroscopic substances such as TBSOTf (**1b**) and DMF-*d*<sub>7</sub> have been handled only in a glovebox. All commercial chemicals were of reagent grade and were used as received unless otherwise noted.  $\text{CDCl}_3$  was refluxed for at least one hour over  $\text{CaH}_2$  and subsequently

distilled.  $^1\text{H}$  and  $^{13}\text{C}$  NMR spectra were recorded at room temperature. All  $^1\text{H}$  chemical shifts are reported in ppm ( $\delta$ ) relative to  $\text{CDCl}_3$  (7.26);  $^{13}\text{C}$  chemical shifts are reported in ppm ( $\delta$ ) relative to  $\text{CDCl}_3$  (77.16).  $^1\text{H}$  NMR kinetic data were measured on a 200 MHz spectrometer at 23 °C. HRMS spectra (ESI-MS or EI-MS) were measured using a FT instrument. All kinetic measurements with reaction times longer than 24 h were mechanically shaken at room temperature. For each reaction the rotation speed was set at 480 turns per minute. Analytical TLCs were determined using aluminium sheets silica gel Si 60 F254. All other chemicals were purchased from commercial suppliers at the highest available grade, stored over orange gel in an exsiccator and used without any further purification.

General procedure (I) for benchmark reactions of **4a** with 2 mol% / 3 mol% / 4 mol% catalyst: 0.2 mL from 5.0 mL of stock solution I (TBS (3.6 mmol), dioxane (0.088 mg, 0.086 mL)), 0.2 mL from 5 mL of stock solution II **4a** (475 mg, 3.0 mmol),  $\text{Et}_3\text{N}$  (3, 364 mg, 0.50 mL) and 0.2 mL of 5 mL stock solution III (0.06 / 0.09 / 0.12 mmol of catalyst) were mixed in a NMR tube and sealed.

General procedure (II) for benchmark reactions of **4b** with 10 mol% / 20 mol% / 30 mol% catalyst: 0.2 mL from 5.0 mL of stock solution I (TBS (3.6 mmol), dioxane (0.088 mg, 0.086 mL)), 0.2 mL from 5 mL of stock solution II **4b** (517 mg, 3.0 mmol),  $\text{Et}_3\text{N}$  (3, 364 mg, 0.50 mL) and 0.2 mL of 5 mL stock solution III (0.12 / 0.24 / 0.36 mmol of DMAP) were mixed in a NMR tube and sealed.

General procedure (III) for benchmark reactions of **4b** in  $\text{DMF-d}_7$  with 30 mol% catalyst and without: 0.2 mL from 1 mL of stock solution I (TBS-X, 0.72 mmol), 0.2 mL from 1 mL of stock solution II **4b** (517 mg, 3.0 mmol),  $\text{Et}_3\text{N}$  (3, 364 mg, 0.10 mL) and 0.2 mL of 1 mL stock solution III DMAP (0.18 mmol, 21.99 mg) were mixed in a NMR tube and sealed.

**Table S6.** Overview of direct rate measurement data for all silyl reagents in various solvents.

| System              | Catalyst (mol%) | Alcohol   | Solvent         | $k_{\text{eff}}$ | $t_{1/2}$ (min) |
|---------------------|-----------------|-----------|-----------------|------------------|-----------------|
| TBSCl ( <b>1a</b> ) | DMAP (4)        | <b>4b</b> | $\text{CDCl}_3$ | 2.40E-04         | 3199.1          |
|                     |                 |           |                 | 2.45E-04         | 3132.8          |
| Avg.                |                 |           |                 | <b>2.43E-04</b>  | <b>3165.6</b>   |
|                     | DMAP (10)       | <b>4b</b> | $\text{CDCl}_3$ | 5.03E-04         | 1525.3          |
|                     |                 |           |                 | 5.08E-04         | 1512.0          |
| Avg.                |                 |           |                 | 4.94E-04         | 1553.8          |
|                     |                 |           |                 | <b>5.02E-04</b>  | <b>1530.2</b>   |
|                     | DMAP (20)       | <b>4b</b> | $\text{CDCl}_3$ | 1.04E-03         | 738.4           |
|                     |                 |           |                 | 1.06E-03         | 724.4           |
| Avg.                |                 |           |                 | 1.07E-03         | 717.7           |
|                     |                 |           |                 | <b>1.06E-03</b>  | <b>726.7</b>    |
|                     | DMAP (30)       | <b>4b</b> | $\text{CDCl}_3$ | 1.60E-03         | 479.9           |
|                     |                 |           |                 | 1.66E-03         | 462.6           |
| Avg.                |                 |           |                 | 1.69E-03         | 454.4           |
|                     |                 |           |                 | <b>1.63E-03</b>  | <b>471.1</b>    |

| System               | Catalyst<br>(mol%) | Alcohol   | Solvent            | $k_{eff}$       | $t_{1/2}$ (min) |
|----------------------|--------------------|-----------|--------------------|-----------------|-----------------|
|                      | DMAP (0)           | <b>4b</b> | DMF-d <sub>7</sub> | 1.15E-01        | 6.7             |
|                      |                    |           |                    | 9.97E-02        | 7.7             |
|                      |                    |           |                    | 9.59E-02        | 8.0             |
| Avg.                 |                    |           |                    | <b>1.04E-01</b> | <b>7.4</b>      |
|                      | DMAP (30)          | <b>4b</b> | DMF-d <sub>7</sub> | 1.05E-01        | 7.3             |
|                      |                    |           |                    | 1.12E-01        | 6.9             |
|                      |                    |           |                    | <b>1.09E-01</b> | <b>7.1</b>      |
| Avg.                 |                    |           |                    |                 |                 |
|                      | DMAP (0.5)         | <b>4a</b> | CDCl <sub>3</sub>  | 3.43E-03        | 223.9           |
|                      |                    |           |                    | 3.47E-03        | 221.3           |
|                      |                    |           |                    | <b>3.45E-03</b> | <b>222.6</b>    |
| Avg.                 |                    |           |                    |                 |                 |
|                      | DMAP (1)           | <b>4a</b> | CDCl <sub>3</sub>  | 6.20E-03        | 123.9           |
|                      |                    |           |                    | 6.20E-03        | 123.9           |
|                      |                    |           |                    | <b>6.20E-03</b> | <b>123.9</b>    |
| Avg.                 |                    |           |                    |                 |                 |
|                      | DMAP (2)           | <b>4a</b> | CDCl <sub>3</sub>  | 1.01E-02        | 76.4            |
|                      |                    |           |                    | 9.67E-03        | 79.4            |
|                      |                    |           |                    | 8.58E-03        | 89.5            |
| Avg.                 |                    |           |                    | <b>9.43E-03</b> | <b>81.4</b>     |
|                      | DMAP (3)           | <b>4a</b> | CDCl <sub>3</sub>  | 1.83E-02        | 42.0            |
|                      |                    |           |                    | 1.80E-02        | 42.6            |
|                      |                    |           |                    | 1.82E-02        | 42.2            |
| Avg.                 |                    |           |                    | <b>1.82E-02</b> | <b>42.3</b>     |
|                      | DMAP (4)           | <b>4a</b> | CDCl <sub>3</sub>  | 2.45E-02        | 31.3            |
|                      |                    |           |                    | 2.76E-02        | 27.9            |
|                      |                    |           |                    | 2.47E-02        | 31.1            |
|                      |                    |           |                    | 2.47E-02        | 31.0            |
|                      |                    |           |                    | <b>2.54E-02</b> | <b>30.1</b>     |
|                      |                    |           |                    |                 |                 |
| TBSOTf ( <b>1b</b> ) | DMAP (0)           | <b>4b</b> | CDCl <sub>3</sub>  | 2.98E+00        | 0.258           |
|                      |                    |           |                    | 5.35E+00        | 0.144           |
|                      |                    |           |                    | 4.92E+00        | 0.156           |
|                      |                    |           |                    | <b>4.42E+00</b> | <b>0.174</b>    |
| Avg.                 |                    |           |                    |                 |                 |
|                      | DMAP (10)          | <b>4b</b> | CDCl <sub>3</sub>  | 5.49E+00        | 0.140           |
|                      |                    |           |                    | 5.10E+00        | 0.151           |
|                      |                    |           |                    | <b>5.30E+00</b> | <b>0.145</b>    |
| Avg.                 |                    |           |                    |                 |                 |
|                      | DMAP (20)          | <b>4b</b> | CDCl <sub>3</sub>  | 4.97E+00        | 0.154           |
|                      |                    |           |                    | 4.85E+00        | 0.158           |
|                      |                    |           |                    | 6.31E+00        | 0.122           |
| Avg.                 |                    |           |                    | <b>5.38E+00</b> | <b>0.143</b>    |
|                      | DMAP (30)          | <b>4b</b> | CDCl <sub>3</sub>  | 4.63E+00        | 0.166           |
|                      |                    |           |                    | 5.57E+00        | 0.138           |
|                      |                    |           |                    | <b>5.10E+00</b> | <b>0.151</b>    |
| Avg.                 |                    |           |                    |                 |                 |
|                      | DMAP (0)           | <b>4b</b> | DMF-d <sub>7</sub> | 5.08E+00        | 0.151           |
|                      |                    |           |                    | 4.68E+00        | 0.164           |
|                      |                    |           |                    | <b>4.88E+00</b> | <b>0.157</b>    |
| Avg.                 |                    |           |                    |                 |                 |
|                      | DMAP (15)          | <b>4b</b> | DMF-d <sub>7</sub> | 4.07E+00        | 0.189           |
|                      |                    |           |                    | 3.21E+00        | 0.239           |
|                      |                    |           |                    | <b>3.64E+00</b> | <b>0.211</b>    |
| Avg.                 |                    |           |                    |                 |                 |
|                      | DMAP (30)          | <b>4b</b> | DMF-d <sub>7</sub> | 6.10E+00        | 0.126           |
|                      |                    |           |                    | 2.17E+00        | 0.353           |
|                      |                    |           |                    | <b>4.14E+00</b> | <b>0.186</b>    |
| Avg.                 |                    |           |                    |                 |                 |
| TBSCN ( <b>1c</b> )  | DMAP (10)          | <b>4b</b> | CDCl <sub>3</sub>  | 2.28E-05        | 33634.8         |
|                      |                    |           |                    | 2.34E-05        | 32810.4         |
|                      |                    |           |                    | 2.24E-05        | 34212.9         |
|                      |                    |           |                    | <b>2.29E-05</b> | <b>33542.8</b>  |
| Avg.                 |                    |           |                    |                 |                 |
|                      | DMAP (20)          | <b>4b</b> | CDCl <sub>3</sub>  | 5.10E-05        | 15055.0         |
|                      |                    |           |                    | 5.45E-05        | 14098.8         |
|                      |                    |           |                    | <b>5.27E-05</b> | <b>14561.2</b>  |
| Avg.                 |                    |           |                    |                 |                 |

| System | Catalyst<br>(mol%) | Alcohol   | Solvent            | $k_{eff}$       | $t_{1/2}$ (min) |
|--------|--------------------|-----------|--------------------|-----------------|-----------------|
| Avg.   | DMAP (30)          | <b>4b</b> | CDCl <sub>3</sub>  | 8.69E-05        | 8832.5          |
|        |                    |           |                    | 8.65E-05        | 8878.4          |
|        |                    |           |                    | <b>8.67E-05</b> | <b>8855.4</b>   |
| Avg.   | DMAP (0)           | <b>4b</b> | DMF-d <sub>7</sub> | 3.62E-02        | 21.2            |
|        |                    |           |                    | 3.80E-02        | 20.2            |
|        |                    |           |                    | <b>3.71E-02</b> | <b>20.7</b>     |
| Avg.   | DMAP (30)          | <b>4b</b> | DMF-d <sub>7</sub> | 3.38E-02        | 22.7            |
|        |                    |           |                    | 4.52E-02        | 17.0            |
|        |                    |           |                    | <b>3.95E-02</b> | <b>19.4</b>     |
| Avg.   | DMAP (1)           | <b>4a</b> | CDCl <sub>3</sub>  | 1.10E-03        | 698.1           |
|        |                    |           |                    | 1.10E-03        | 698.1           |
|        |                    |           |                    | 1.12E-03        | 685.6           |
| Avg.   | DMAP (2)           | <b>4a</b> | CDCl <sub>3</sub>  | <b>1.11E-03</b> | <b>693.9</b>    |
|        |                    |           |                    | 1.56E-03        | 492.2           |
|        |                    |           |                    | 1.57E-03        | 489.1           |
| Avg.   | DMAP (3)           | <b>4a</b> | CDCl <sub>3</sub>  | 1.58E-03        | 486.0           |
|        |                    |           |                    | <b>1.57E-03</b> | <b>489.1</b>    |
|        |                    |           |                    | 1.28E-03        | 599.9           |
| Avg.   | DMAP (4)           | <b>4a</b> | CDCl <sub>3</sub>  | 1.20E-03        | 639.9           |
|        |                    |           |                    | 1.20E-03        | 639.9           |
|        |                    |           |                    | <b>1.23E-03</b> | <b>626.0</b>    |
| Avg.   | DMAP (4)           | <b>4a</b> | CDCl <sub>3</sub>  | 1.86E-03        | 412.8           |
|        |                    |           |                    | 1.92E-03        | 399.9           |
|        |                    |           |                    | 1.99E-03        | 385.9           |
| Avg.   | DMAP (4)           | <b>4a</b> | CDCl <sub>3</sub>  | <b>1.92E-03</b> | <b>399.3</b>    |
|        |                    |           |                    | 4.91E-05        | 15637.6         |
|        |                    |           |                    | 4.88E-05        | 15727.2         |
| Avg.   | DMAP (30)          | <b>4b</b> | CDCl <sub>3</sub>  | <b>4.90E-05</b> | <b>15682.3</b>  |
|        |                    |           |                    | 9.35E-03        | 82.1            |
|        |                    |           |                    | 2.18E-02        | 35.3            |
| Avg.   | DMAP (0)           | <b>4b</b> | DMF-d <sub>7</sub> | <b>1.06E-02</b> | <b>49.4</b>     |
|        |                    |           |                    | 7.81E-03        | 98.3            |
|        |                    |           |                    | 1.33E-02        | 59.6            |
| Avg.   | DMAP (30)          | <b>4b</b> | DMF-d <sub>7</sub> | <b>1.43E-02</b> | <b>72.6</b>     |
|        |                    |           |                    |                 |                 |
|        |                    |           |                    |                 |                 |

#### 4) Direct Rate Measurements – Results

All results of the direct rate measurements will be shown on the following pages, sorted by the leaving group of the silyl compound. The data have been normalized with  $y_0$  obtained from equation S7 and plotted in order to reach a conversion of 100%.

As mentioned in the manuscript a linear correlation between catalyst concentration and silyl reagent was obtained for primary alcohol (**4a**) for the transformation with TBSCl (**1a**) and TBSCN (**1c**) (Figure S6).

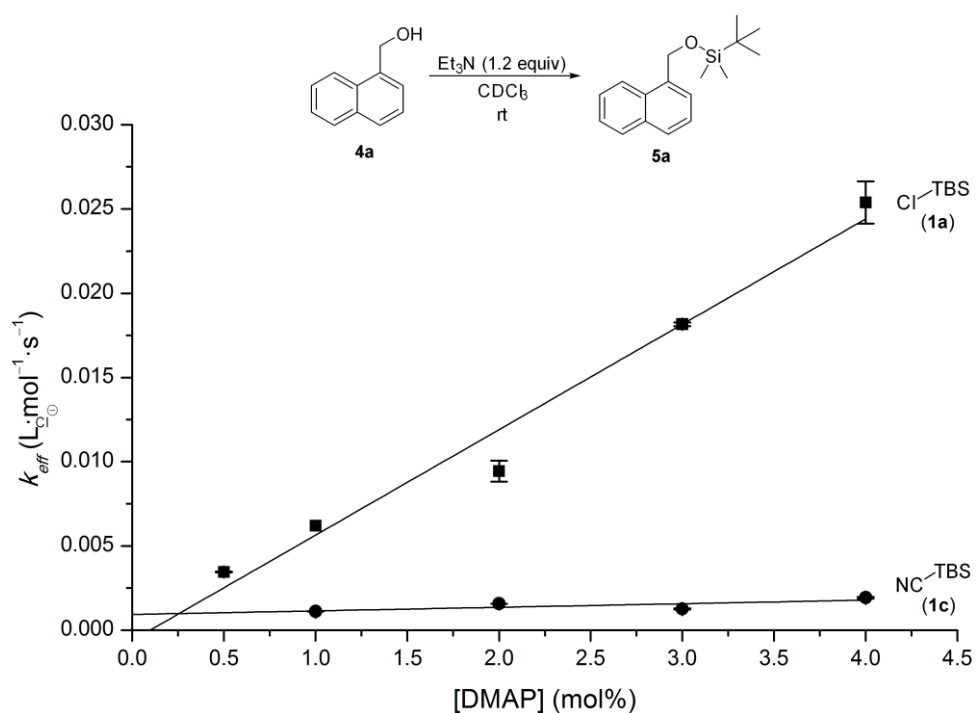

**Figure S6.** Influence of catalyst concentration on the silylation of primary alcohol **4a** with various silylation reagents in  $\text{CDCl}_3$ .

## 4.1 Time vs. conversion plots

### 4.1.1 Measurements with TBSCl (**1a**)

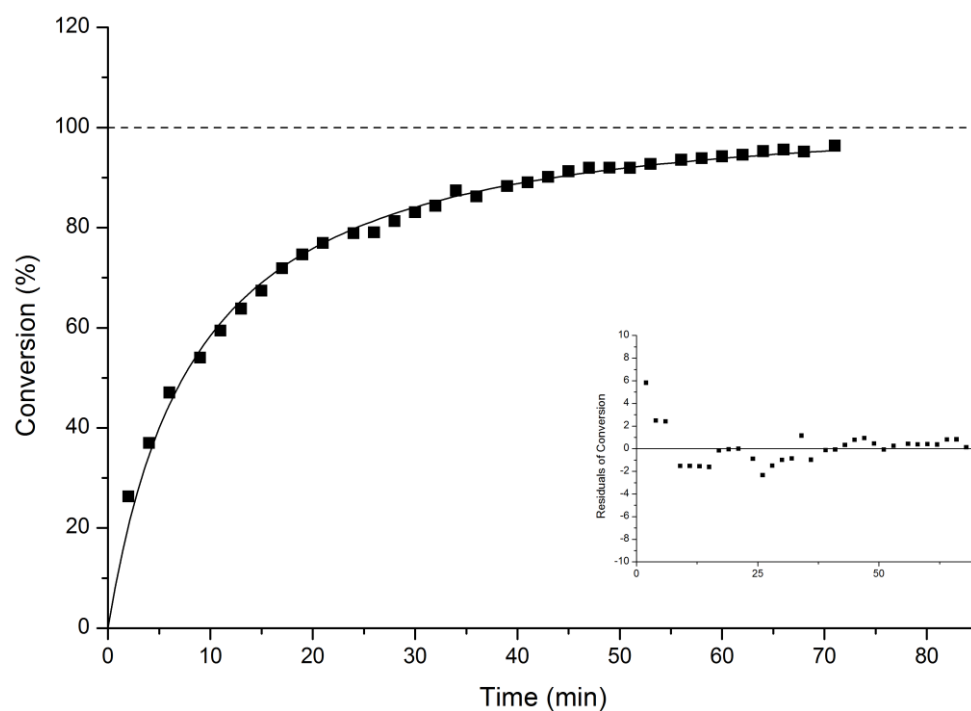

**Figure S7** Conversion vs time plot of **4b** with 1.2 equiv of TEA (**3b**), 1.2 equiv TBSCl (**1a**), and DMAP with 30 mol% catalyst loading in DMF- $d_7$ .

$$R^2 = 0.9927$$

$$k_{\text{eff}} = 0.10517$$

$$t_{1/2} = 7.3 \text{ min}$$

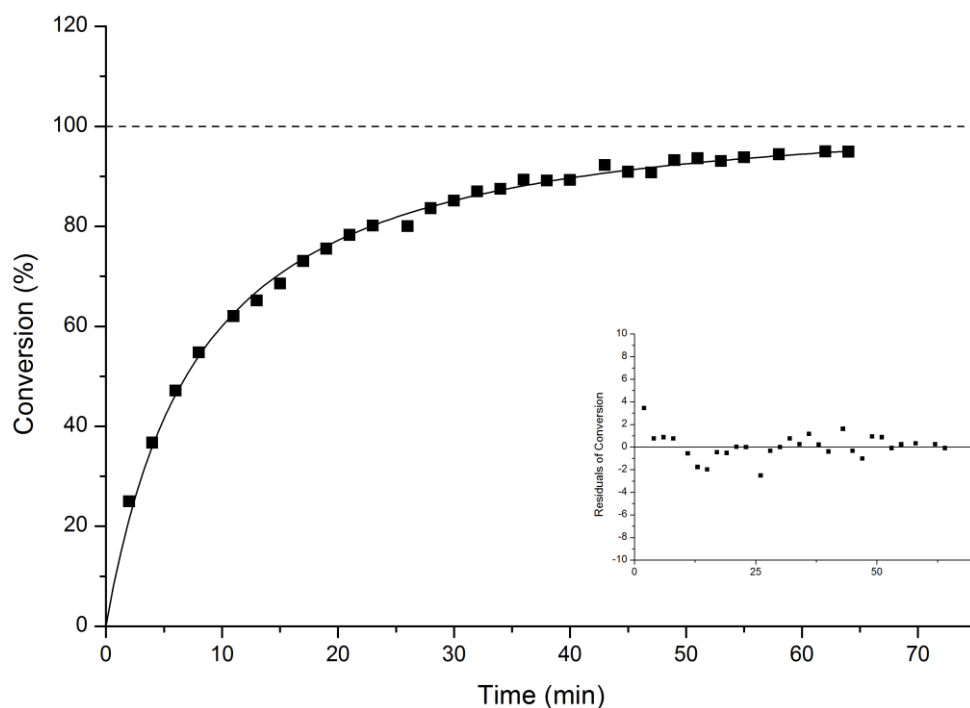

**Figure S8** Second conversion vs time plot of **4b** with 1.2 equiv of TEA (**3b**), 1.2 equiv TBSCl (**1a**), and DMAP with 30 mol% catalyst loading in DMF- $d_7$ .

$$R^2 = 0.9961$$

$$k_{\text{eff}} = 0.11183$$

$$t_{1/2} = 6.9 \text{ min}$$

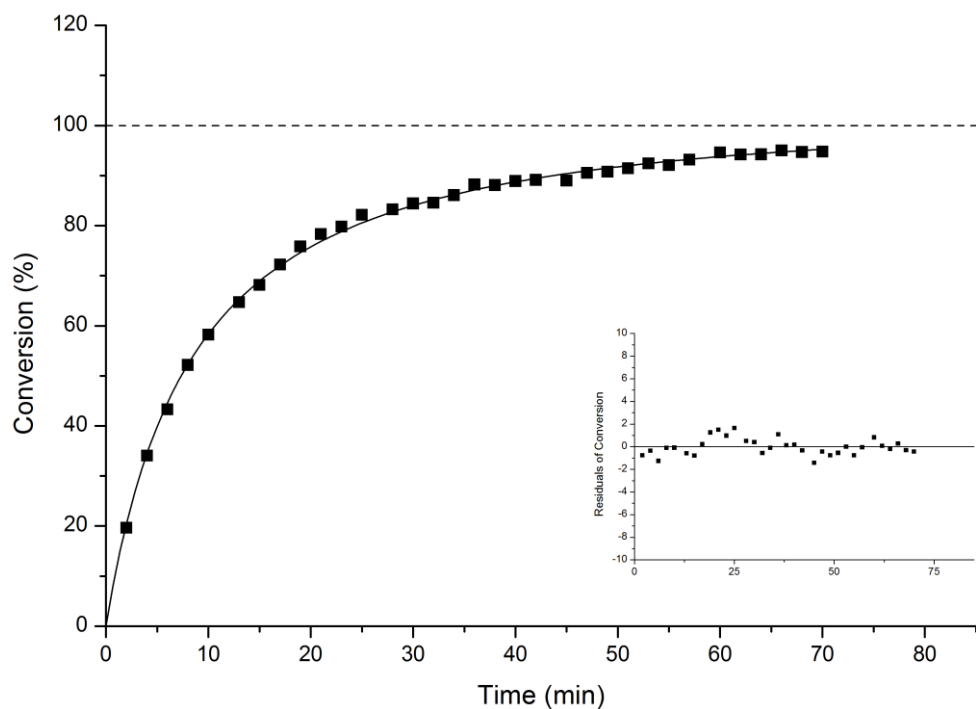

**Figure S9** Conversion vs time plot of **4b** with 1.2 equiv of Imidazole (**3a**), 1.2 equiv TBSCl (**1a**), and no catalyst loading in DMF-d<sub>7</sub>.

$$R^2 = 0.99841$$

$$k_{\text{eff}} = 0.1048$$

$$t_{1/2} = 7.3 \text{ min}$$

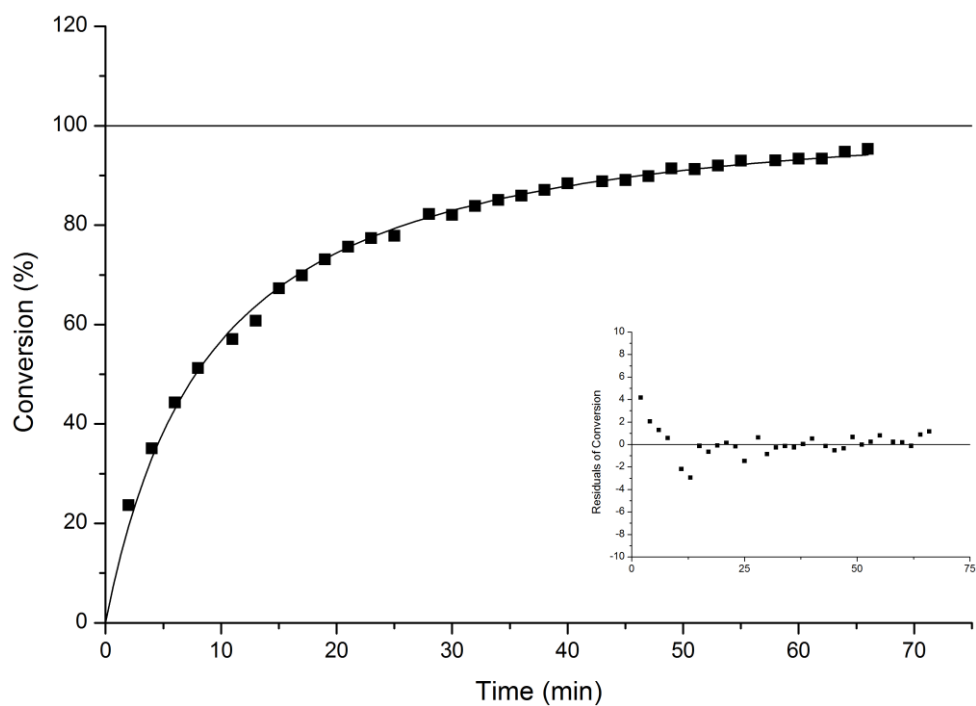

**Figure S10** Second conversion vs time plot of **4b** with 1.2 equiv of Imidazole (**3a**), 1.2 equiv TBSCl (**1a**), and no catalyst loading in DMF-d<sub>7</sub>.

$$R^2 = 0.99551$$

$$k_{\text{eff}} = 0.09875$$

$$t_{1/2} = 7.8 \text{ min}$$

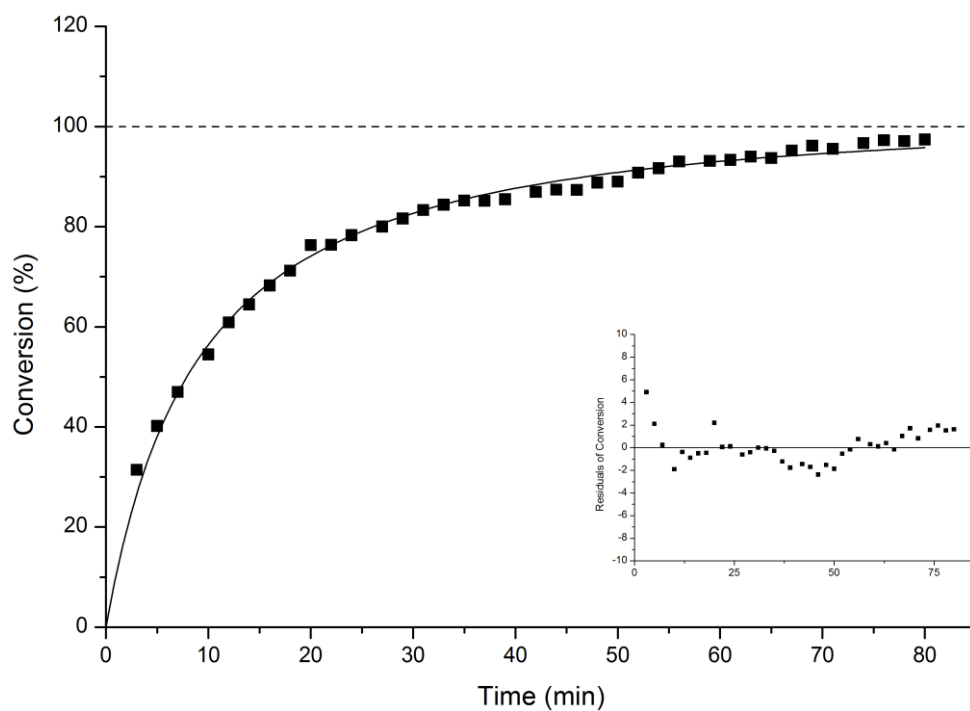

**Figure S11** Conversion vs time plot of **4b** with 1.8 equiv of Imidazole (**3a**), 1.2 equiv TBSCl (**1a**), and no catalyst loading in DMF-d<sub>7</sub>.

$$R^2 = 0.9920$$

$$k_{\text{eff}} = 0.09754$$

$$t_{1/2} = 7.8 \text{ min}$$

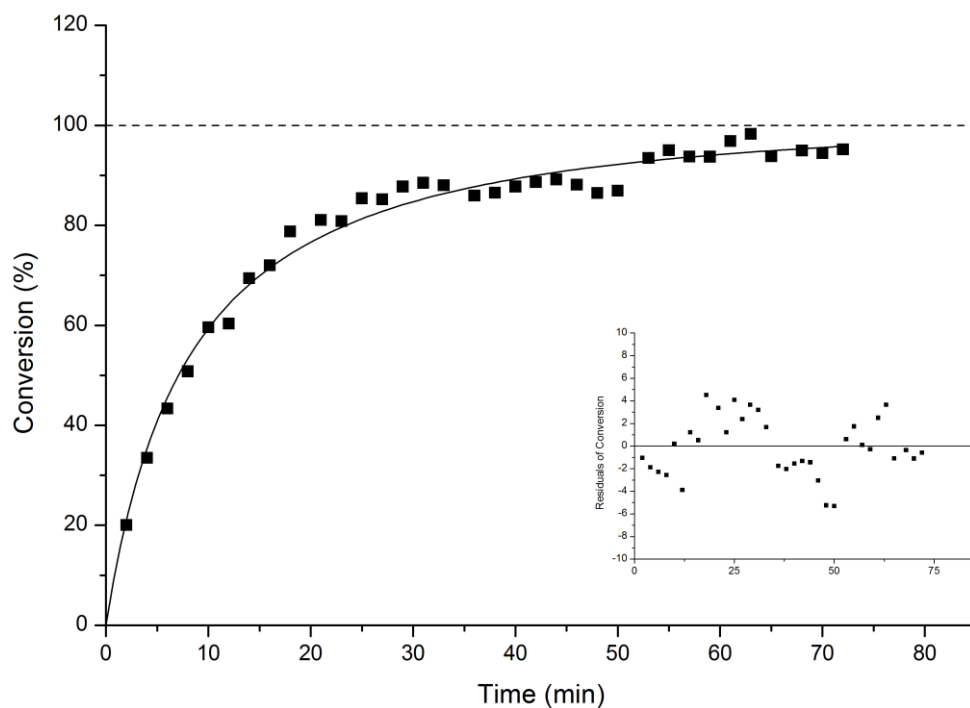

**Figure S12** Second Conversion vs time plot of **4b** with 1.8 equiv of Imidazole (**3a**), 1.2 equiv TBSCl (**1a**), and no catalyst loading in DMF-d<sub>7</sub>.

$$R^2 = 0.98095$$

$$k_{\text{eff}} = 0.10913$$

$$t_{1/2} = 7.0 \text{ min}$$



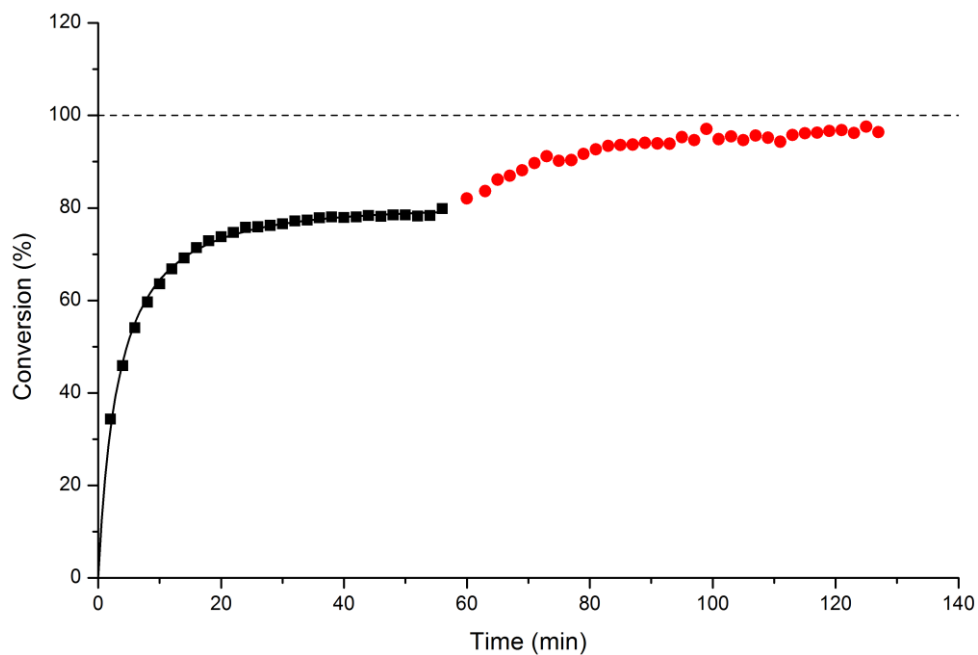

**Figure S13** Conversion vs time plot of **4b** with 1.2 equiv TBSCl (**1a**) in DMF-d<sub>7</sub> (black) and addition of 1.2 equiv Et<sub>3</sub>N (**3b**) (red).

$$R^2 = 0.9958$$

$$k_{\text{eff}} = 0.26426$$

$$t_{1/2} = 2.9 \text{ min}$$

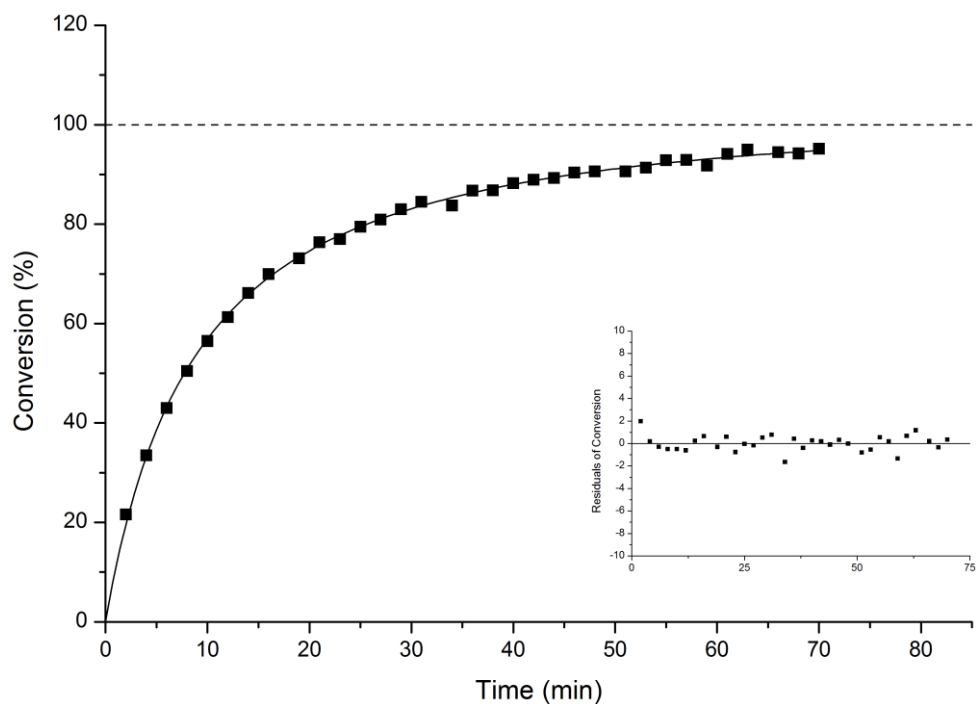

**Figure S14** Conversion vs time plot of **4b** with 1.2 equiv of Et<sub>3</sub>N (**3b**) and 1.2 equiv TBSCl (**1a**) in DMF-d<sub>7</sub>.

$$R^2 = 0.99857$$

$$k_{\text{eff}} = 0.09868$$

$$t_{1/2} = 7.7 \text{ min}$$

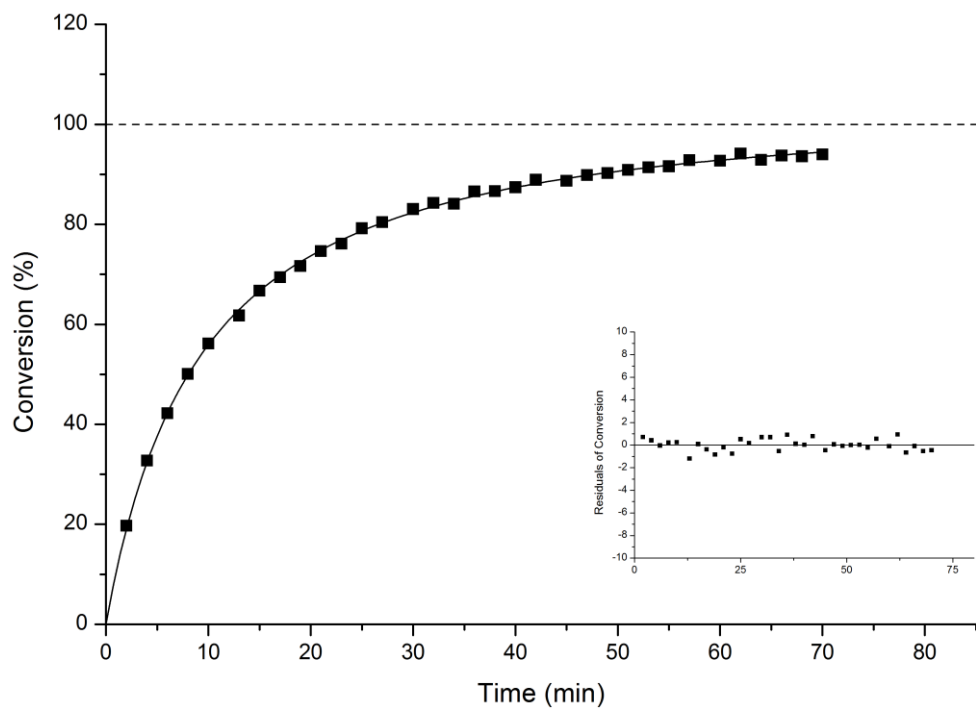

**Figure S15** Second conversion vs time plot of **4b** with 1.2 equiv of Et<sub>3</sub>N (**3b**), and 1.2 equiv TBSCl (**1a**) in DMF-d<sub>7</sub>.

$$R^2 = 0.99919$$

$$k_{\text{eff}} = 0.09585$$

$$t_{1/2} = 8.0 \text{ min}$$

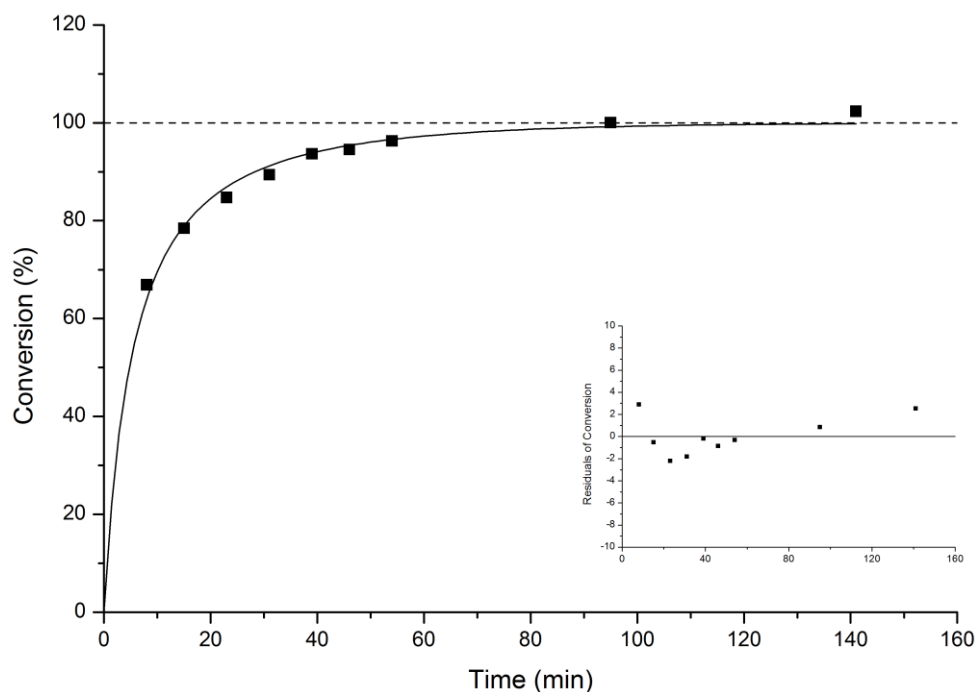

**Figure S16** Third conversion vs time plot of **4b** with 1.2 equiv of Et<sub>3</sub>N (**3b**), and 1.2 equiv TBSCl (**1a**) in DMF-d<sub>7</sub>.

$$R^2 = 0.97232$$

$$k_{\text{eff}} = 0.16206$$

$$t_{1/2} = 6.7 \text{ min}$$

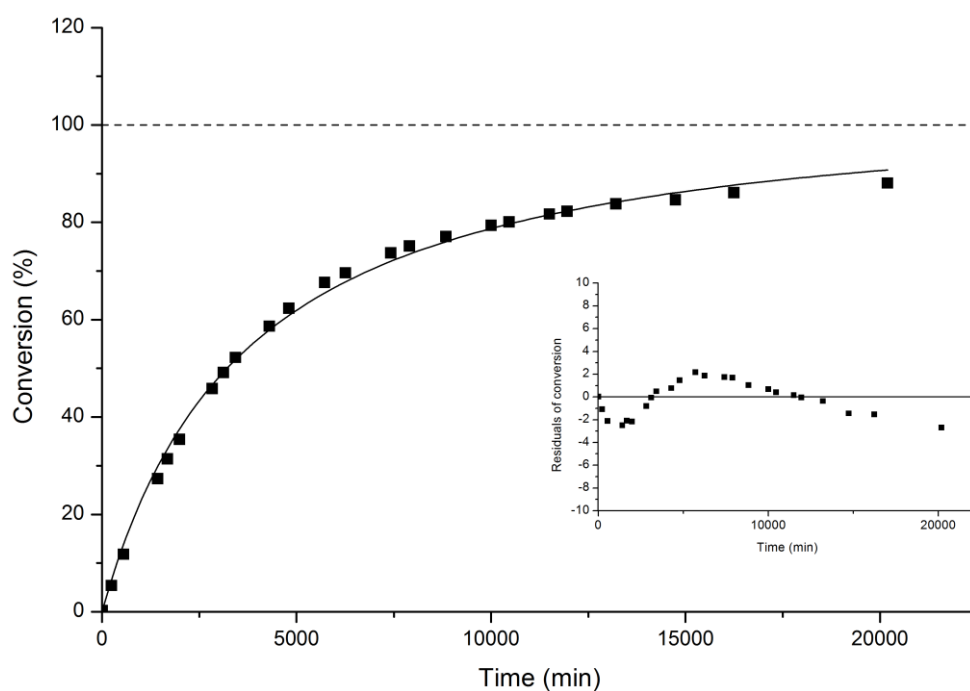

**Figure S17** Conversion vs time plot of **4b** with 1.2 equiv of Et<sub>3</sub>N (**3b**), 1.2 equiv TBSCl (**1a**), and DMAP as catalyst with 4.0 mol% catalyst loading in CDCl<sub>3</sub>.

$$R^2 = 0.99678$$

$$k_{\text{eff}} = 2.40 \times 10^{-4}$$

$$t_{1/2} = 3199.1 \text{ min}$$

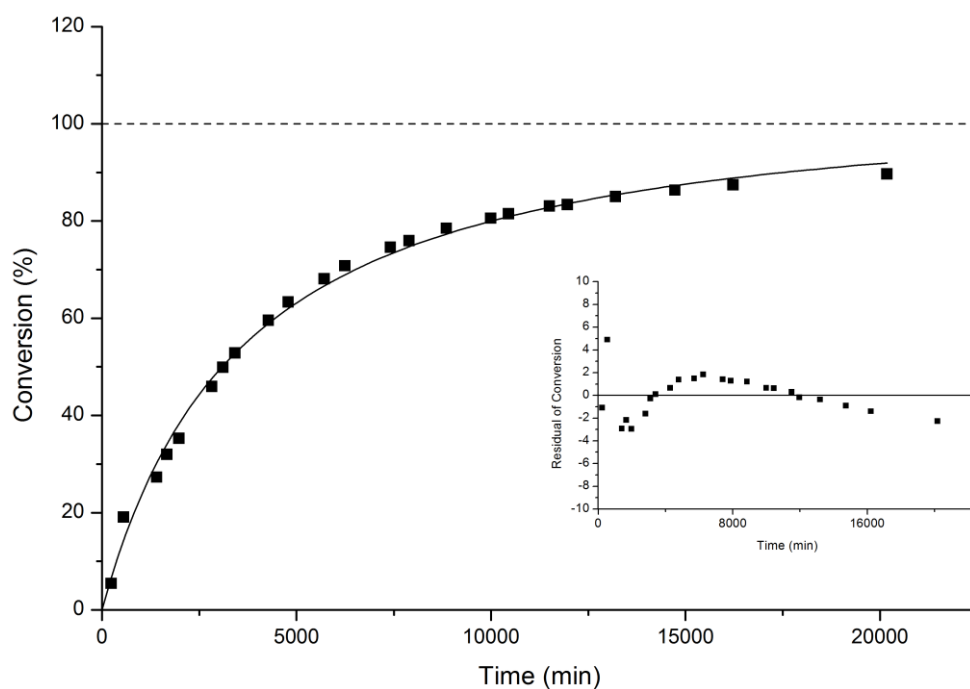

**Figure S18.** Second conversion vs time plot of **4b** with 1.2 equiv of Et<sub>3</sub>N (**3b**), 1.2 equiv TBSCl (**1a**), and DMAP as catalyst with 4.0 mol% catalyst loading in CDCl<sub>3</sub>.

$$R^2 = 0.9943$$

$$k_{\text{eff}} = 2.451 \times 10^{-4}$$

$$t_{1/2} = 3132.8 \text{ min}$$

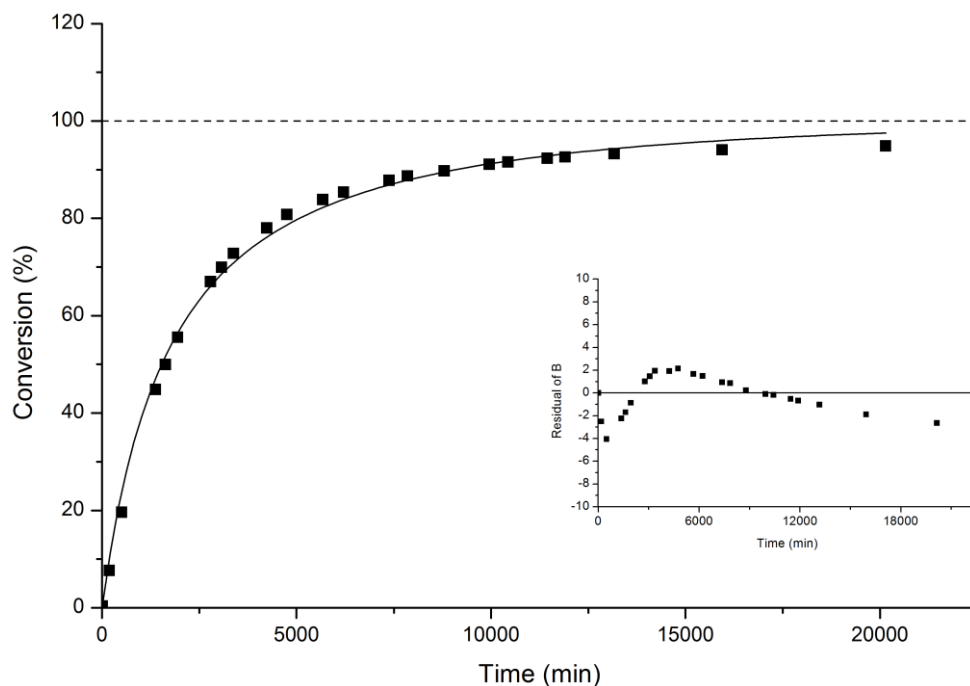

**Figure S19.** Conversion vs time plot of **4b** with 1.2 equiv of Et<sub>3</sub>N (**3b**), 1.2 equiv TBSCl (**1a**), and DMAP as catalyst with 10.0 mol% catalyst loading in CDCl<sub>3</sub>.

$$R^2 = 0.99614$$

$$k_{\text{eff}} = 5.034 \times 10^{-4}$$

$$t_{1/2} = 1525.3 \text{ min}$$

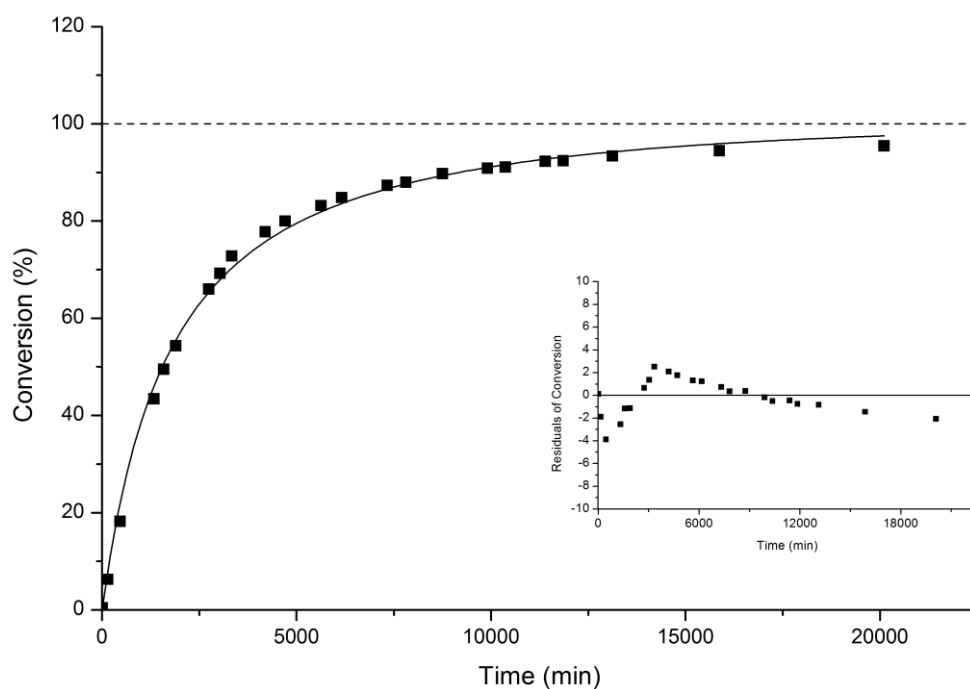

**Figure S20.** Second conversion vs time plot of **4b** with 1.2 equiv of Et<sub>3</sub>N (**3b**), 1.2 equiv TBSCl (**1a**), and DMAP as catalyst with 10.0 mol% catalyst loading in CDCl<sub>3</sub>.

$$R^2 = 0.99658$$

$$k_{\text{eff}} = 5.079 \times 10^{-4}$$

$$t_{1/2} = 1512.0 \text{ min}$$

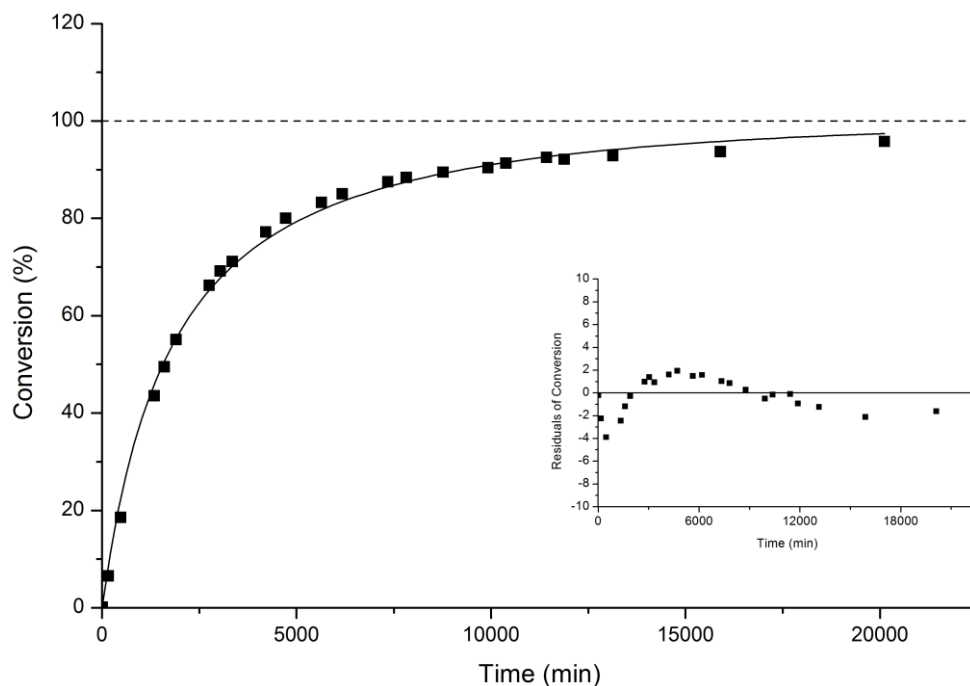

**Figure S21.** Third conversion vs time plot of **4b** with 1.2 equiv of Et<sub>3</sub>N (**3b**), 1.2 equiv TBSCl (**1a**), and DMAP as catalyst with 10.0 mol% catalyst loading in CDCl<sub>3</sub>.

$$R^2 = 0.99678$$

$$k_{\text{eff}} = 4.94 \times 10^{-4}$$

$$t_{1/2} = 1553.8 \text{ min}$$

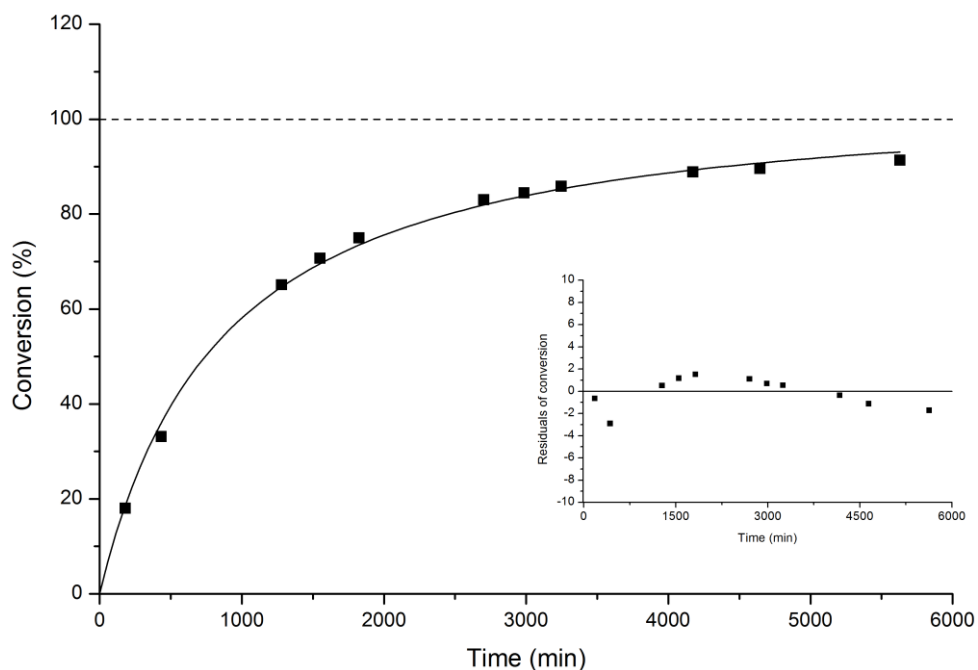

**Figure S22.** Conversion vs time plot of **4b** with 1.2 equiv of Et<sub>3</sub>N (**3b**), 1.2 equiv TBSCl (**1a**), and DMAP as catalyst with 20.0 mol% catalyst loading in CDCl<sub>3</sub>.

$$R^2 = 0.99638$$

$$k_{\text{eff}} = 1.04 \times 10^{-3}$$

$$t_{1/2} = 738.4 \text{ min}$$

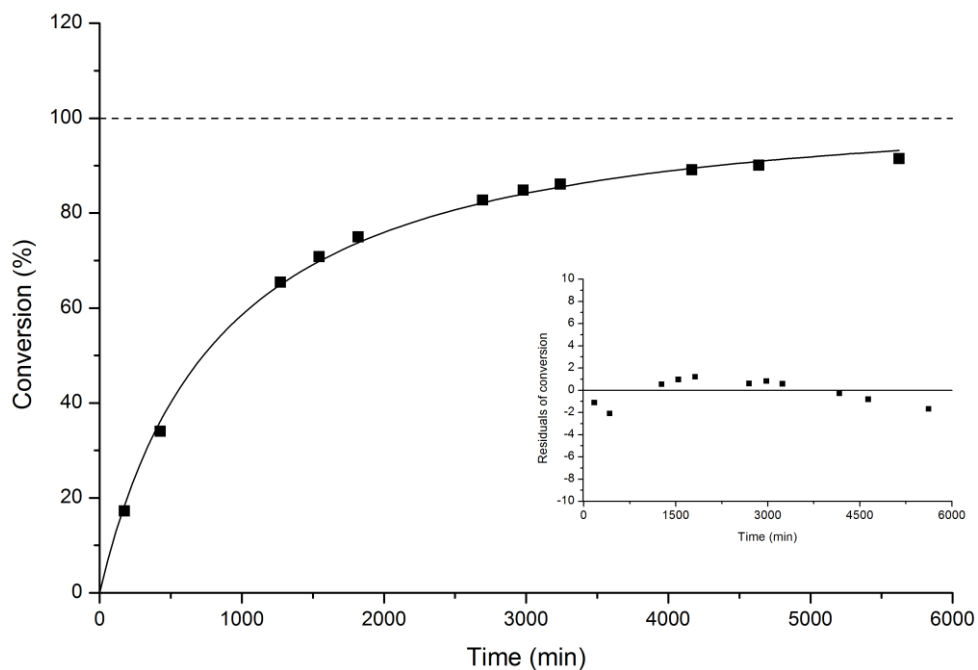

**Figure S23.** Second conversion vs time plot of **4b** with 1.2 equiv of Et<sub>3</sub>N (**3b**), 1.2 equiv TBSCl (**1a**), and DMAP as catalyst with 20.0 mol% catalyst loading in CDCl<sub>3</sub>.

$$R^2 = 0.9975$$

$$k_{\text{eff}} = 1.06 \times 10^{-3}$$

$$t_{1/2} = 724.5 \text{ min}$$

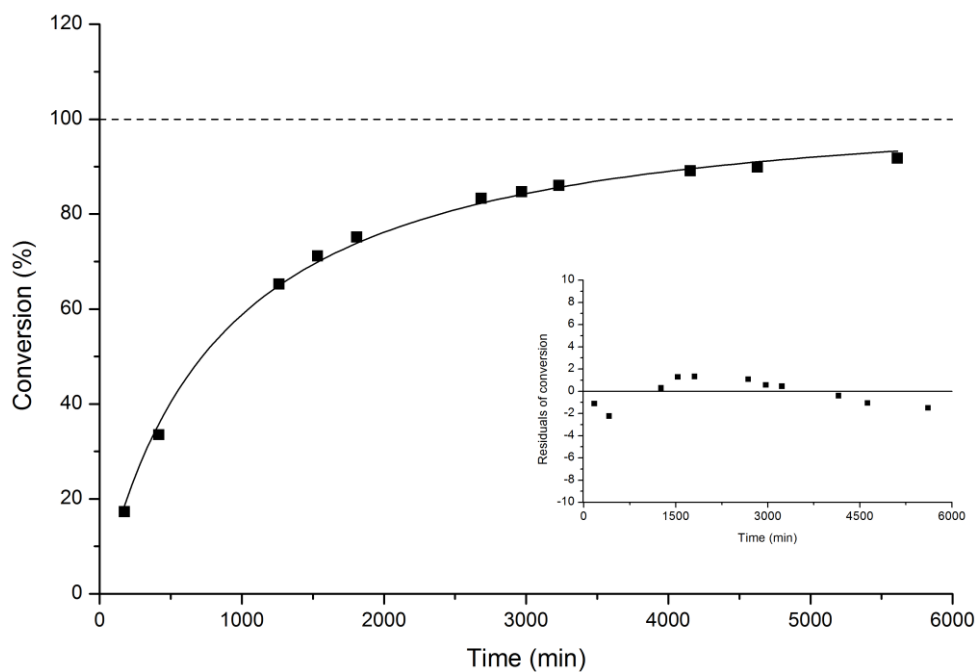

**Figure S24.** Third conversion vs time plot of **4b** with 1.2 equiv of Et<sub>3</sub>N (**3b**), 1.2 equiv TBSCl (**1a**), and DMAP as catalyst with 20.0 mol% catalyst loading in CDCl<sub>3</sub>.

$$R^2 = 0.9972$$

$$k_{\text{eff}} = 1.07 \times 10^{-3}$$

$$t_{1/2} = 717.7 \text{ min}$$

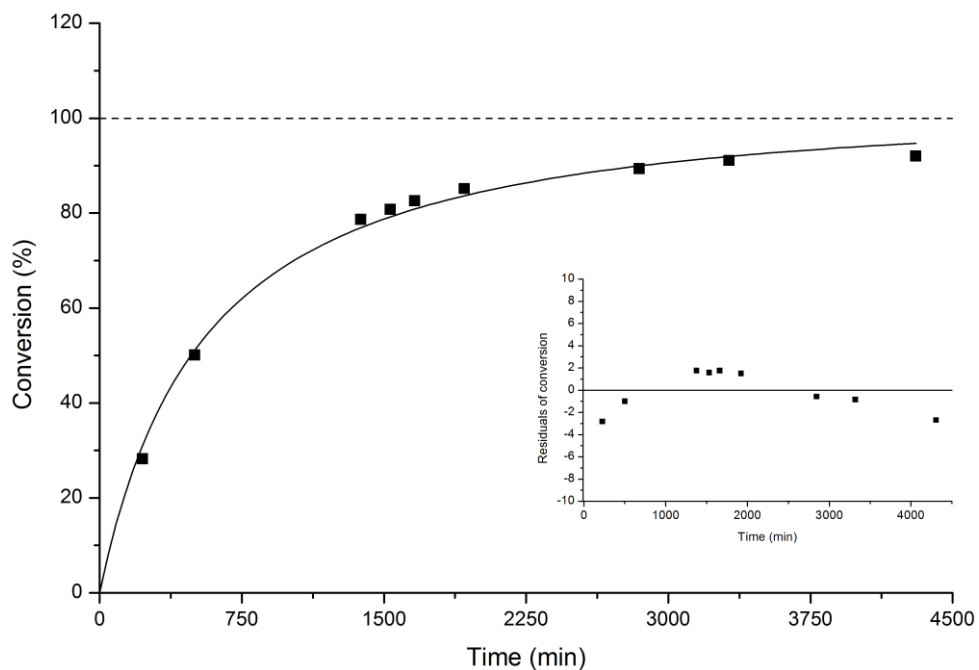

**Figure S25.** Conversion vs time plot of **4b** with 1.2 equiv of Et<sub>3</sub>N (**3b**), 1.2 equiv TBSCl (**1a**), and DMAP as catalyst with 30.0 mol% catalyst loading.

$$R^2 = 0.9914$$

$$k_{\text{eff}} = 1.60 \times 10^{-3}$$

$$t_{1/2} = 479.9 \text{ min}$$

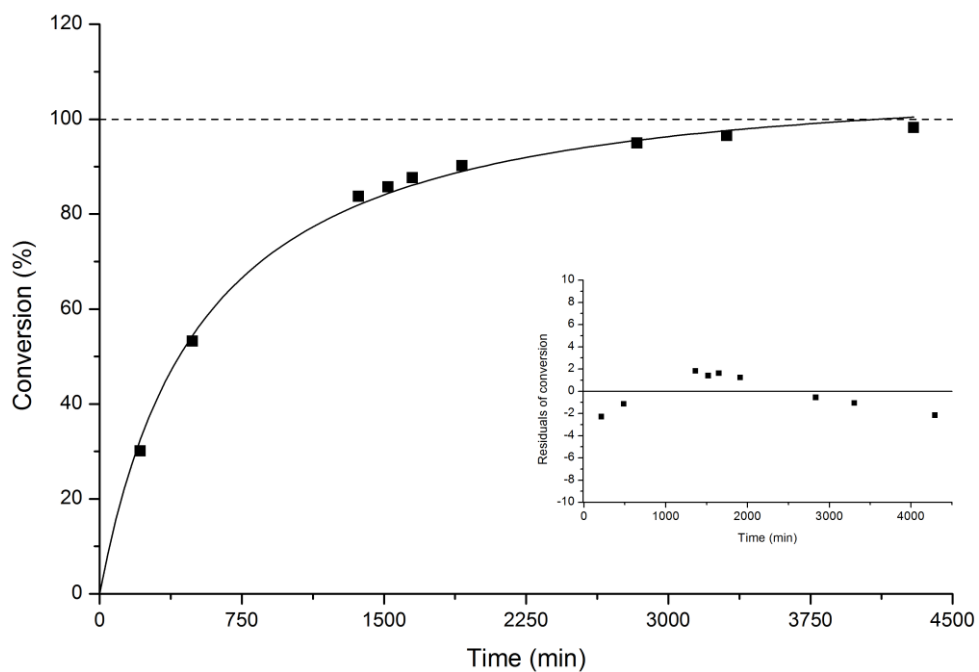

**Figure S26.** Second Conversion vs time plot of **4b** with 1.2 equiv of Et<sub>3</sub>N (**3b**), 1.2 equiv TBSCl (**1a**), and DMAP as catalyst with 30.0 mol% catalyst loading in CDCl<sub>3</sub>.

$$R^2 = 0.99404$$

$$k_{\text{eff}} = 1.66 \times 10^{-3}$$

$$t_{1/2} = 462.6 \text{ min}$$

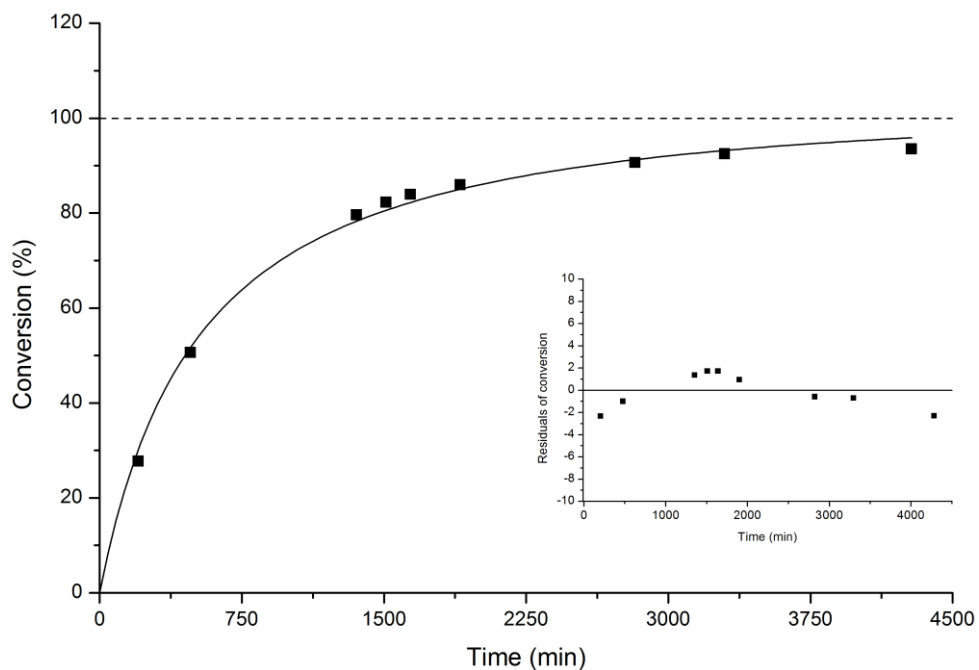

**Figure S27.** Third Conversion vs time plot of **4b** with 1.2 equiv of Et<sub>3</sub>N (**3b**), 1.2 equiv TBSCl (**1a**), and DMAP as catalyst with 30.0 mol% catalyst loading in CDCl<sub>3</sub>.

$$R^2 = 0.9938$$

$$k_{\text{eff}} = 1.69 \times 10^{-3}$$

$$t_{1/2} = 454.4 \text{ min}$$

#### 4.1.1.1 Primary Alcohol (**4a**)

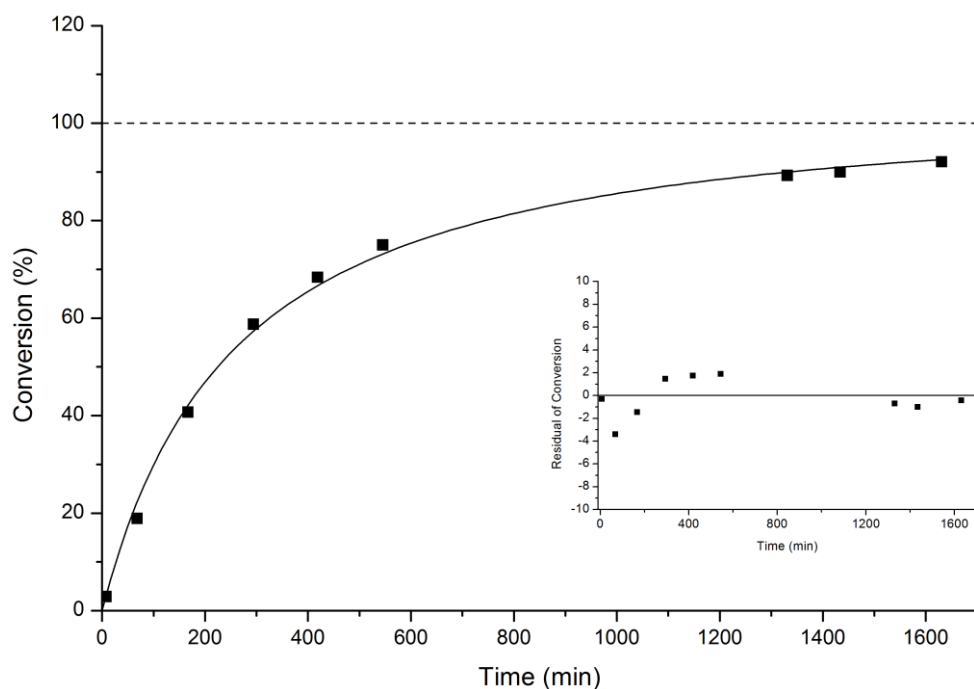

**Figure S28.** Conversion vs time plot of **4b** with 1.2 equiv of Et<sub>3</sub>N (**3b**), 1.2 equiv TBSCl (**1a**), and DMAP as catalyst with 0.5 mol% catalyst loading in CDCl<sub>3</sub>.

$$R^2 = 0.99672$$

$$k_{\text{eff}} = 3.43 \times 10^{-3}$$

$$t_{1/2} = 223.8 \text{ min}$$



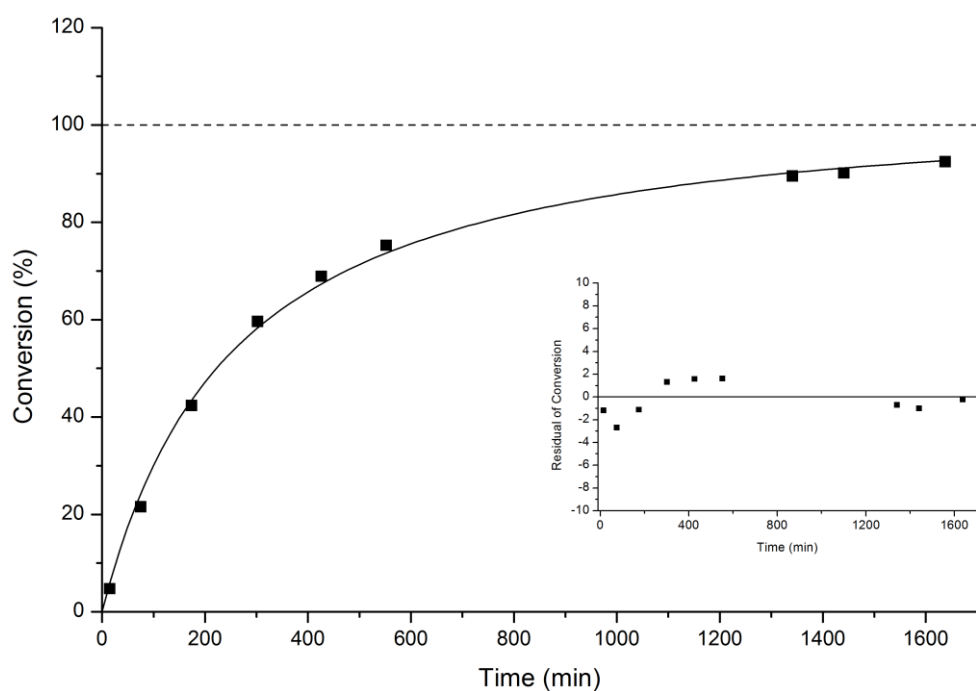

**Figure S29.** Second conversion vs time plot of **4b** with 1.2 equiv of **Et<sub>3</sub>N (3b)**, 1.2 equiv **TBSCl (1a)**, and DMAP as catalyst with 0.5 mol% catalyst loading in  $\text{CDCl}_3$ .

$$R^2 = 0.99739$$

$$k_{\text{eff}} = 3.47 \times 10^{-3}$$

$$t_{1/2} = 221.3 \text{ min}$$

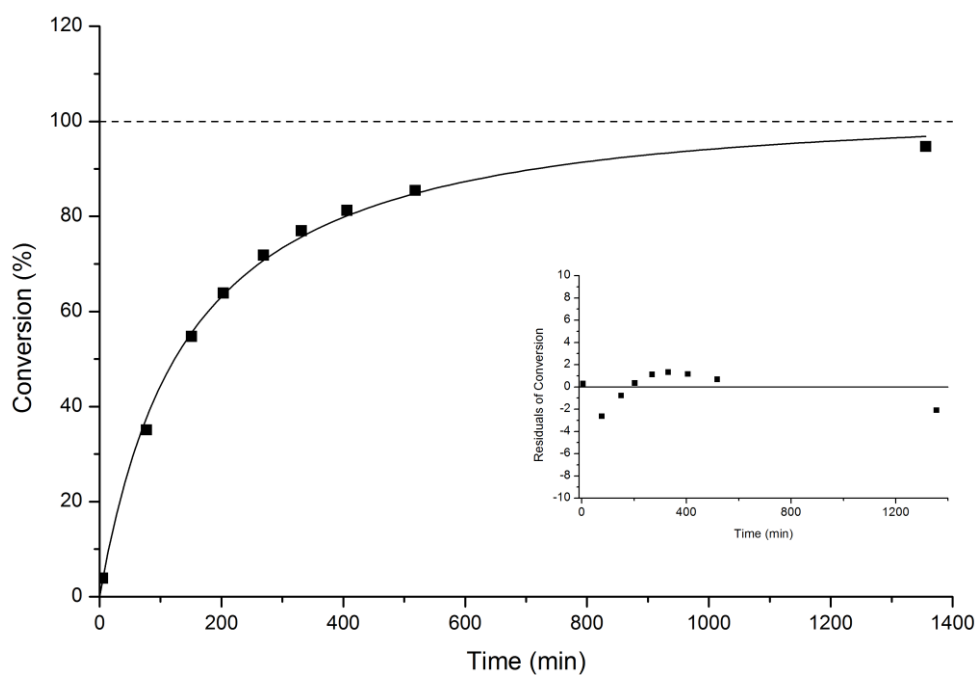

**Figure S30.** Conversion vs time plot of **4b** with 1.2 equiv of **Et<sub>3</sub>N (3b)**, 1.2 equiv **TBSCl (1a)**, and DMAP as catalyst with 1.0 mol% catalyst loading in  $\text{CDCl}_3$ .

$$R^2 = 0.99701$$

$$k_{\text{eff}} = 6.21 \times 10^{-3}$$

$$t_{1/2} = 123.9 \text{ min}$$

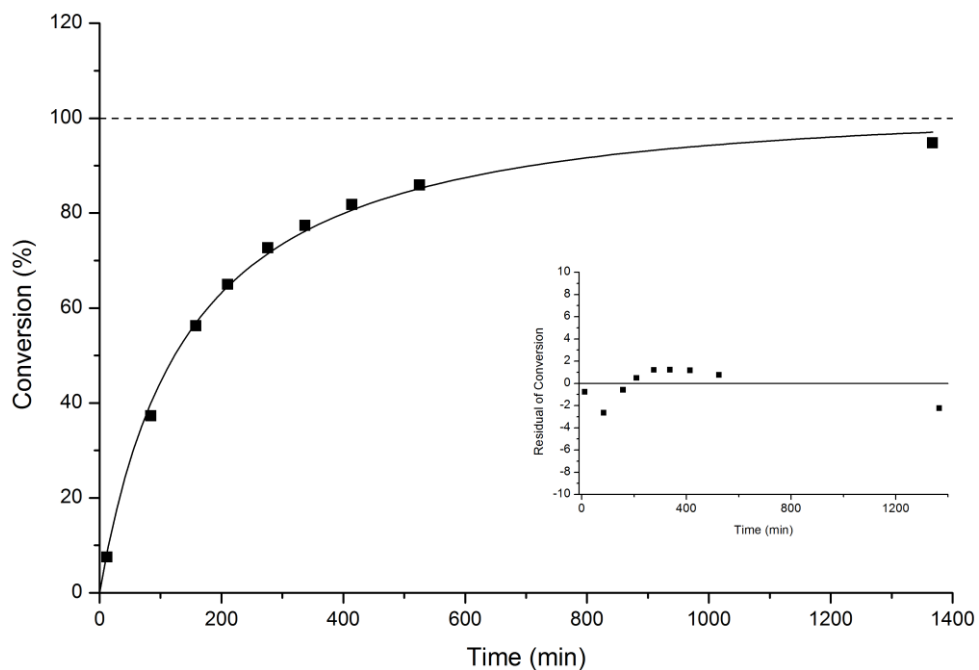

**Figure S31.** Second conversion vs time plot of **4b** with 1.2 equiv of **Et<sub>3</sub>N (3b)**, 1.2 equiv **TBSCl (1a)**, and DMAP as catalyst with 1.0 mol% catalyst loading in  $\text{CDCl}_3$ .

$$R^2 = 0.99652 \quad k_{\text{eff}} = 6.20 \times 10^{-3} \quad t_{1/2} = 123.9 \text{ min}$$

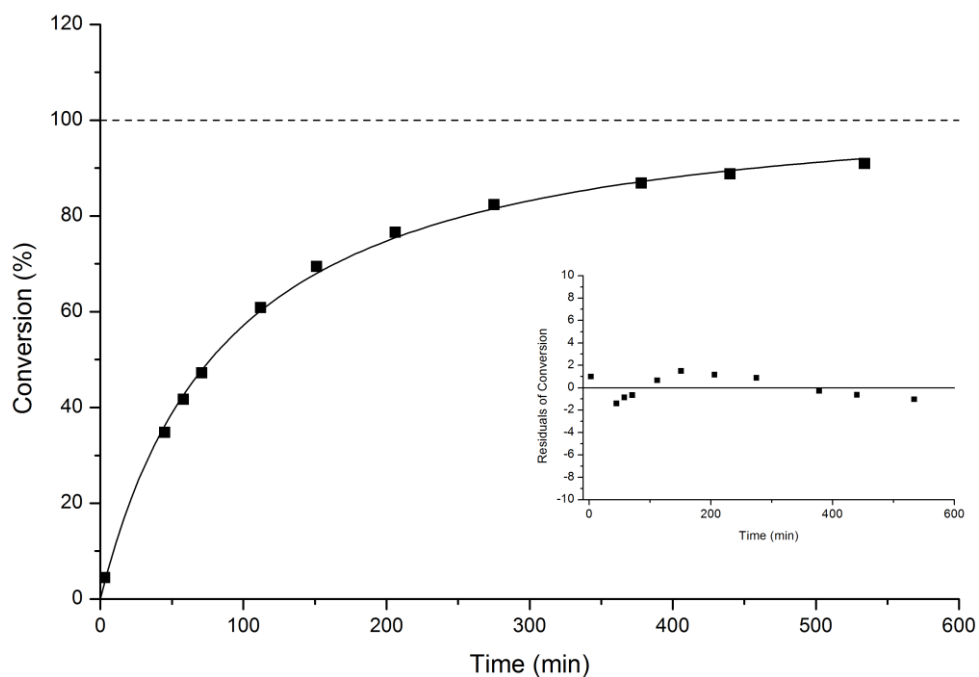

**Figure S32.** Conversion vs time plot of **4b** with 1.2 equiv of **Et<sub>3</sub>N (3b)**, 1.2 equiv **TBSCl (1a)**, and DMAP as catalyst with 2.0 mol% catalyst loading in  $\text{CDCl}_3$ .

$$R^2 = 0.99844 \quad k_{\text{eff}} = 1.00 \times 10^{-2} \quad t_{1/2} = 76.4 \text{ min}$$

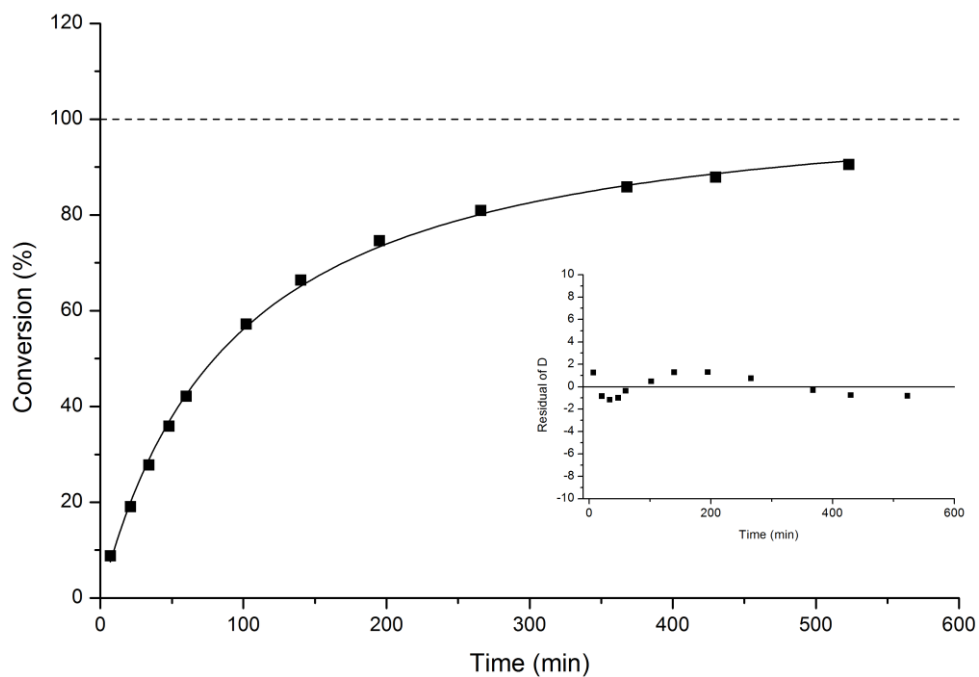

**Figure S33.** Second conversion vs time plot of **4b** with 1.2 equiv of Et<sub>3</sub>N (**3b**), 1.2 equiv TBSCl (**1a**), and DMAP as catalyst with 2.0 mol% catalyst loading in CDCl<sub>3</sub>.

$$R^2 = 0.99878$$

$$k_{\text{eff}} = 9.76 \times 10^{-3}$$

$$t_{1/2} = 79.4 \text{ min}$$

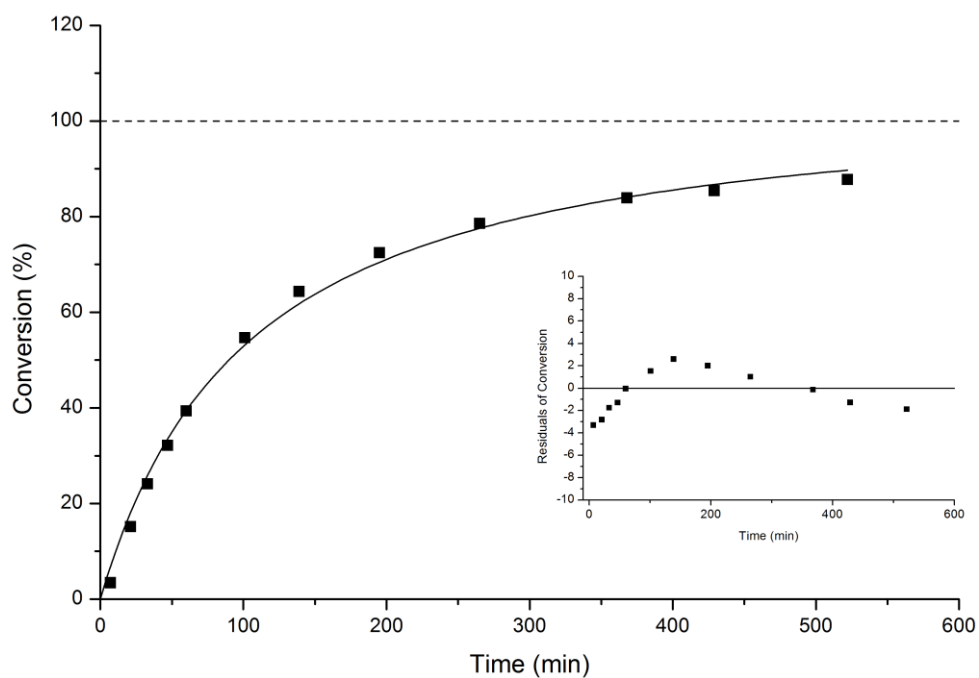

**Figure S34.** Third conversion vs time plot of **4b** with 1.2 equiv of Et<sub>3</sub>N (**3b**), 1.2 equiv TBSCl (**1a**), and DMAP as catalyst with 2.0 mol% catalyst loading in CDCl<sub>3</sub>.

$$R^2 = 0.99511$$

$$k_{\text{eff}} = 8.58 \times 10^{-3}$$

$$t_{1/2} = 89.5 \text{ min}$$

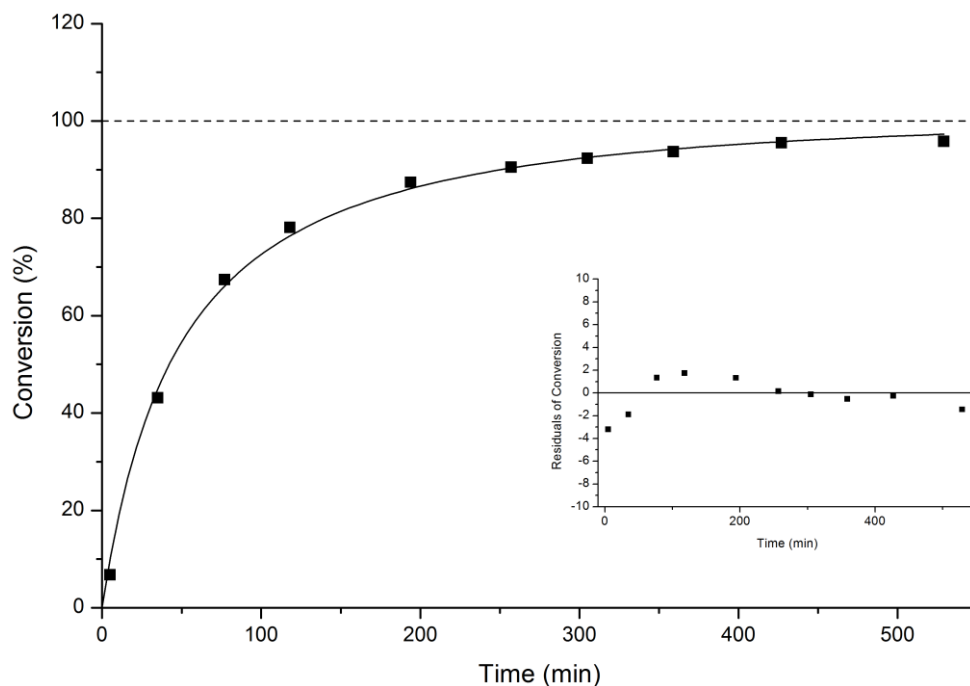

**Figure S35.** Conversion vs time plot of **4b** with 1.2 equiv of Et<sub>3</sub>N (**3b**), 1.2 equiv TBSCl (**1a**), and DMAP as catalyst with 3.0 mol% catalyst loading in CDCl<sub>3</sub>.

$$R^2 = 0.99662$$

$$k_{\text{eff}} = 1.828 \times 10^{-2}$$

$$t_{1/2} = 42.0 \text{ min}$$

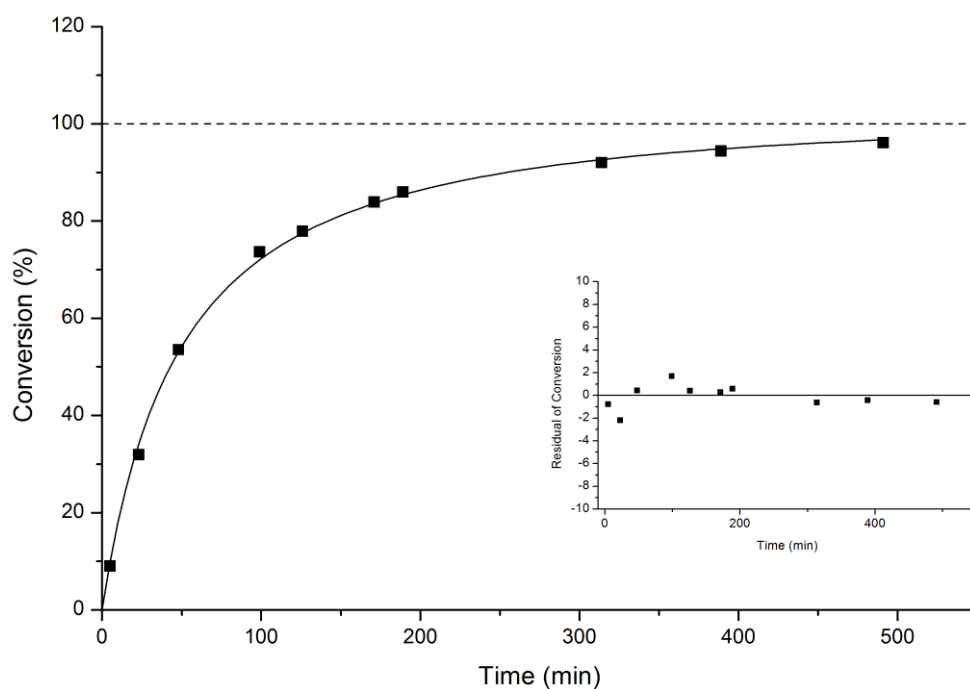

**Figure S36.** Second conversion vs time plot of **4b** with 1.2 equiv of Et<sub>3</sub>N (**3b**), 1.2 equiv TBSCl (**1a**), and DMAP as catalyst with 3.0 mol% catalyst loading in CDCl<sub>3</sub>.

$$R^2 = 0.99855$$

$$k_{\text{eff}} = 1.801 \times 10^{-2}$$

$$t_{1/2} = 42.6 \text{ min}$$

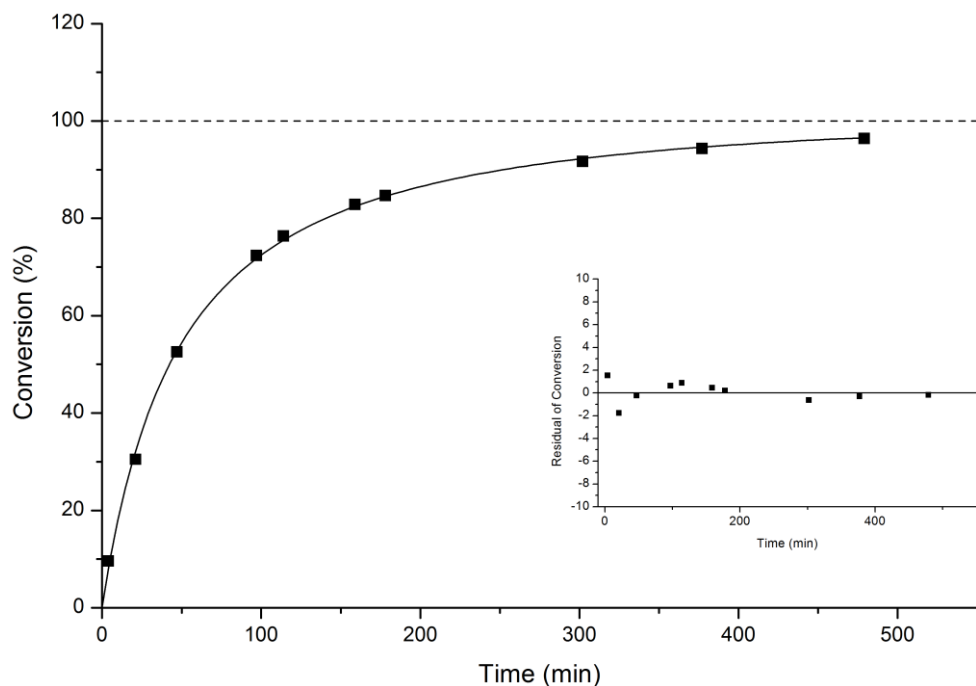

**Figure S37.** Third conversion vs time plot of **4b** with 1.2 equiv of Et<sub>3</sub>N (**3b**), 1.2 equiv TBSCl (**1a**), and DMAP as catalyst with 3.0 mol% catalyst loading in CDCl<sub>3</sub>.

$$R^2 = 0.9989$$

$$k_{\text{eff}} = 1.818 \times 10^{-2}$$

$$t_{1/2} = 42.2 \text{ min}$$

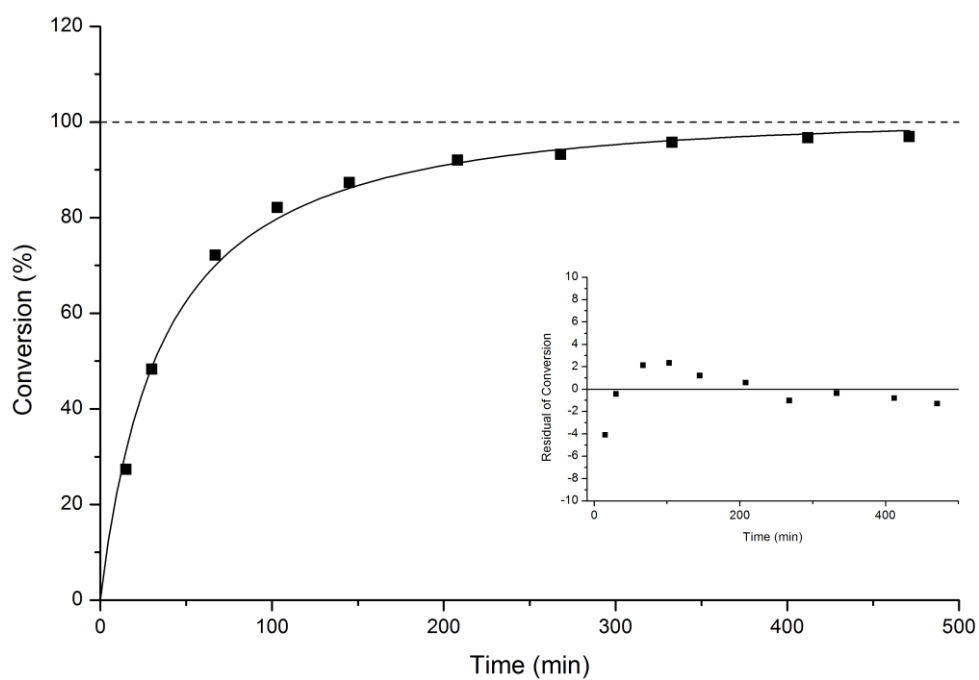

**Figure S38.** Conversion vs time plot of **4b** with 1.2 equiv of Et<sub>3</sub>N (**3b**), 1.2 equiv TBSCl (**1a**), and DMAP as catalyst with 4.0 mol% catalyst loading in CDCl<sub>3</sub>.

$$R^2 = 0.9928$$

$$k_{\text{eff}} = 2.45 \times 10^{-2}$$

$$t_{1/2} = 31.3 \text{ min}$$

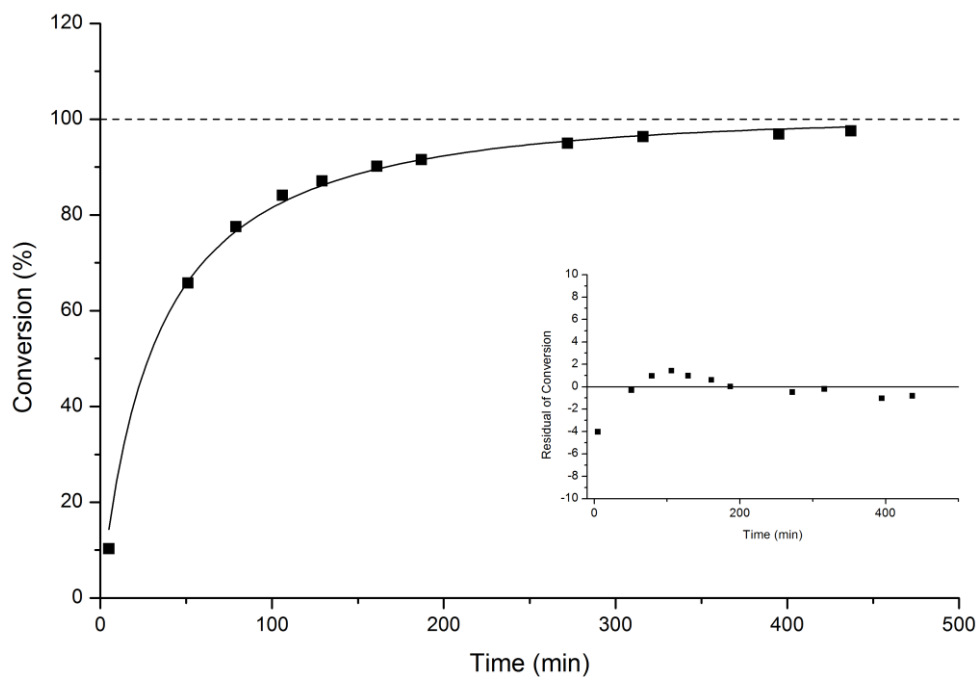

**Figure S39.** Second conversion vs time plot of **4b** with 1.2 equiv of Et<sub>3</sub>N (**3b**), 1.2 equiv TBSCl (**1a**), and DMAP as catalyst with 4.0 mol% catalyst loading in CDCl<sub>3</sub>.

$$R^2 = 0.99609 \quad k_{\text{eff}} = 2.75 \times 10^{-2} \quad t_{1/2} = 27.9 \text{ min}$$

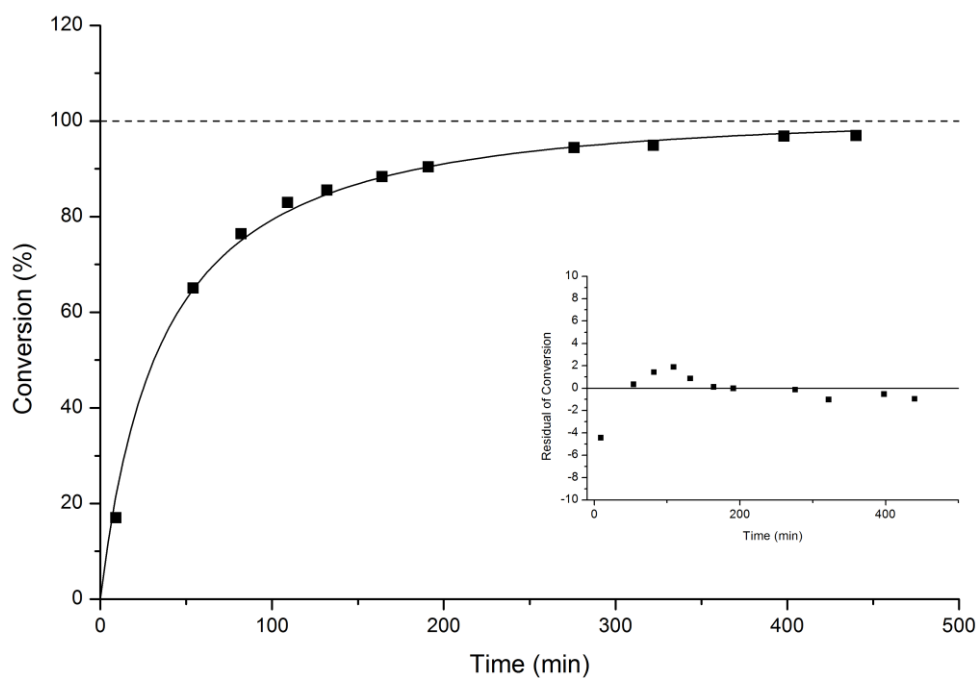

**Figure S40.** Third conversion vs time plot of **4b** with 1.2 equiv of Et<sub>3</sub>N (**3b**), 1.2 equiv TBSCl (**1a**), and DMAP as catalyst with 4.0 mol% catalyst loading in CDCl<sub>3</sub>.

$$R^2 = 0.99416 \quad k_{\text{eff}} = 2.473 \times 10^{-2} \quad t_{1/2} = 31.1 \text{ min}$$

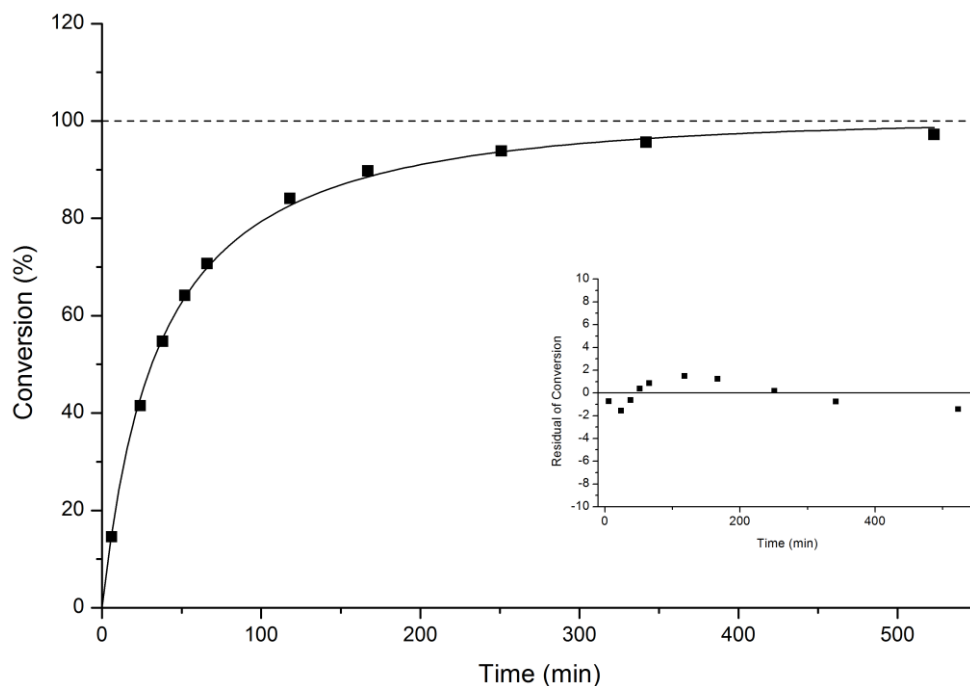

**Figure S41.** Forth conversion vs time plot of **4b** with 1.2 equiv of Et<sub>3</sub>N (**3b**), 1.2 equiv TBSCl (**1a**), and DMAP as catalyst with 4.0 mol% catalyst loading in CDCl<sub>3</sub>.

$$R^2 = 0.99823$$

$$k_{\text{eff}} = 2.474 \times 10^{-2}$$

$$t_{1/2} = 31.0 \text{ min}$$

#### 4.1.2 Measurements with TBSOTf (**1b**)

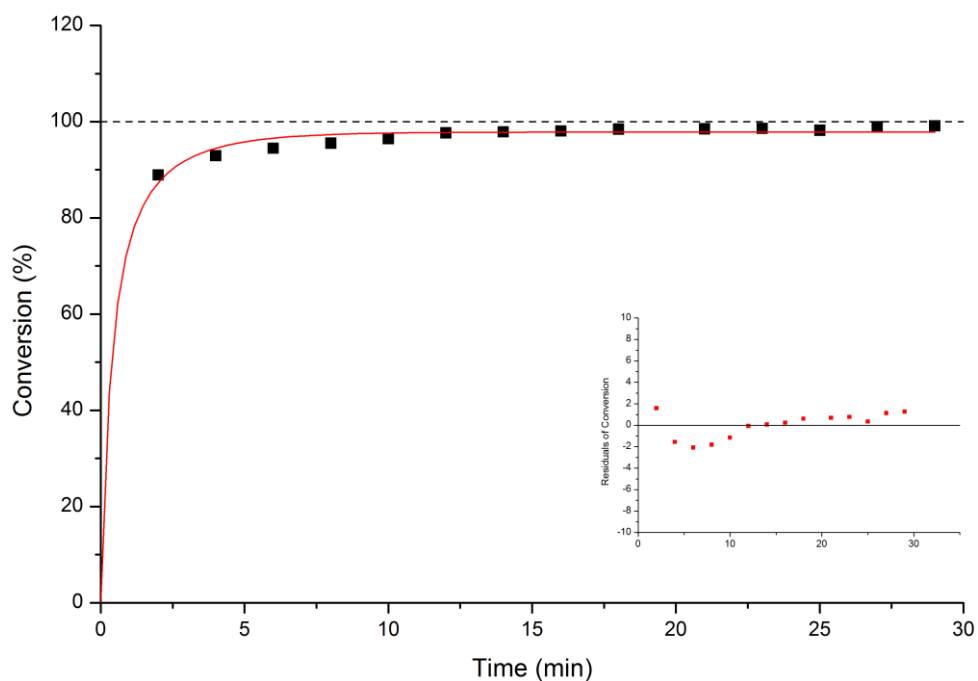

**Figure S42** Conversion vs time plot of **4b** with 1.2 equiv of Et<sub>3</sub>N (**3b**), 1.2 equiv TBSOTf (**1b**), and 30 mol% DMAP as catalyst in DMF-d<sub>7</sub>.

$$R^2 = 0.8343$$

$$k_{\text{eff}} = 2.137$$

$$t_{1/2} = 0.353 \text{ min}$$

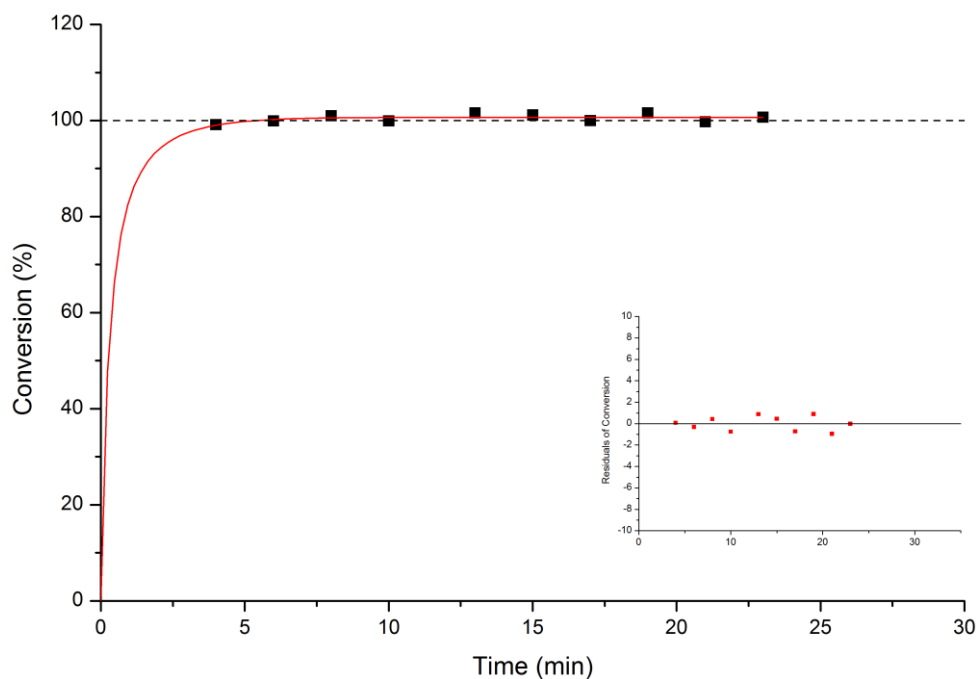

**Figure S43** Second conversion vs time plot of **4b** with 1.2 equiv of Et<sub>3</sub>N (**3b**), 1.2 equiv TBSOTf (**1b**), and 30 mol% DMAP as catalyst in DMF-d<sub>7</sub>.

$$R^2 = 0.9215$$

$$k_{\text{eff}} = 2.9975$$

$$t_{1/2} = 0.256 \text{ min}$$

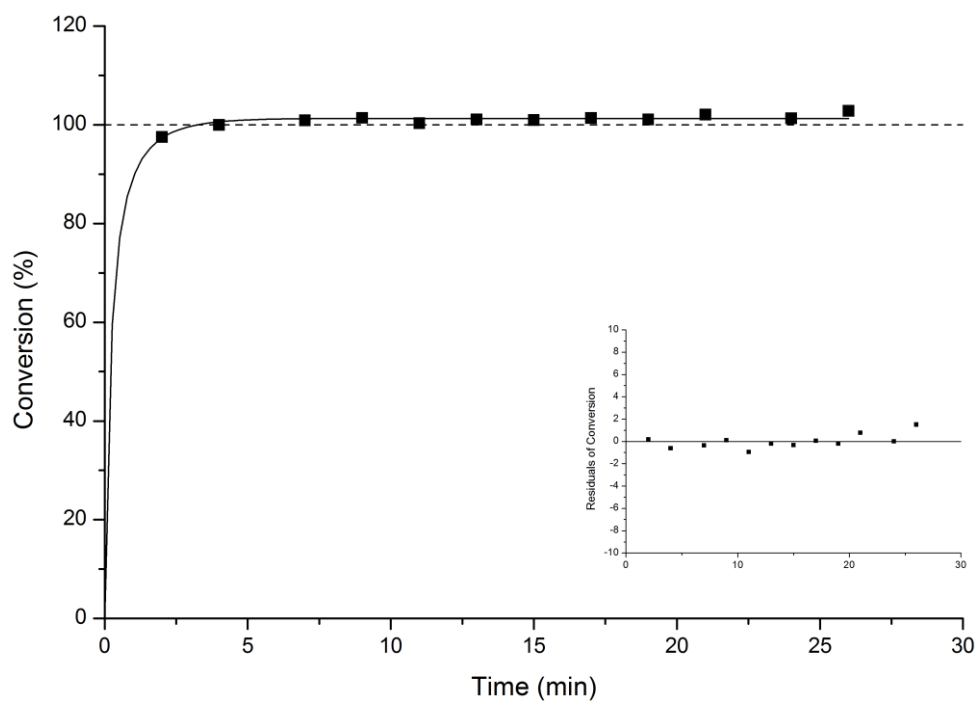

**Figure S44** Conversion vs time plot of **4b** with 1.2 equiv of Et<sub>3</sub>N (**3b**), 1.2 equiv TBSOTf (**1b**), and 15 mol% DMAP as catalyst in DMF-d<sub>7</sub>.

$$R^2 = 0.7241$$

$$k_{\text{eff}} = 4.065$$

$$t_{1/2} = 0.189 \text{ min}$$



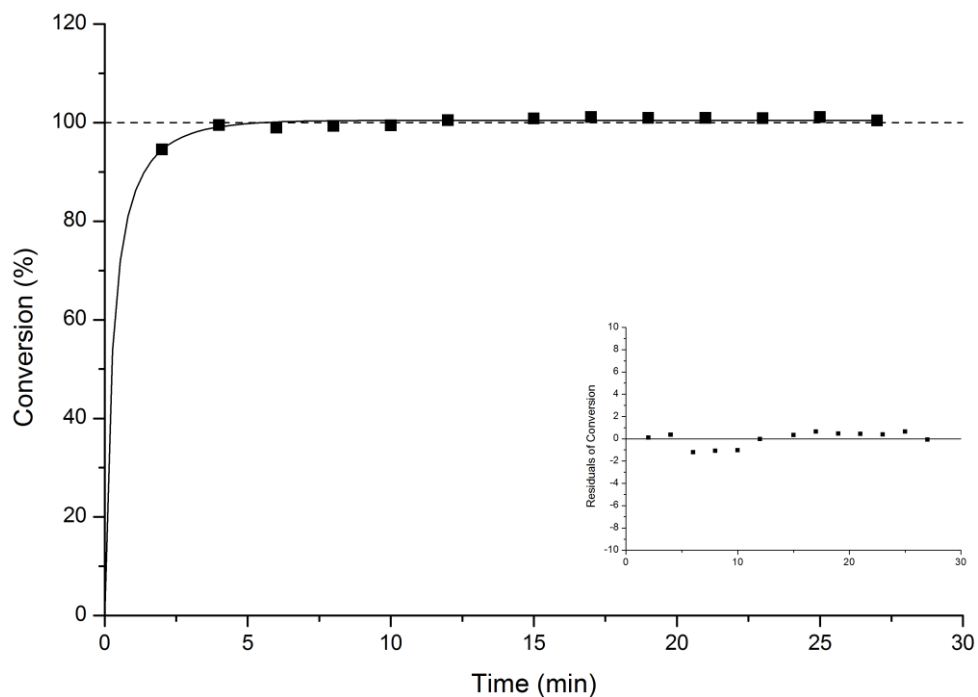

**Figure S45** Second conversion vs time plot of **4b** with 1.2 equiv of  $\text{Et}_3\text{N}$  (**3b**), 1.2 equiv TBSOTf (**1b**), and 15 mol% DMAP as catalyst in  $\text{DMF-d}_7$ .

$$R^2 = 0.8465$$

$$k_{\text{eff}} = 3.214$$

$$t_{1/2} = 0.239 \text{ min}$$

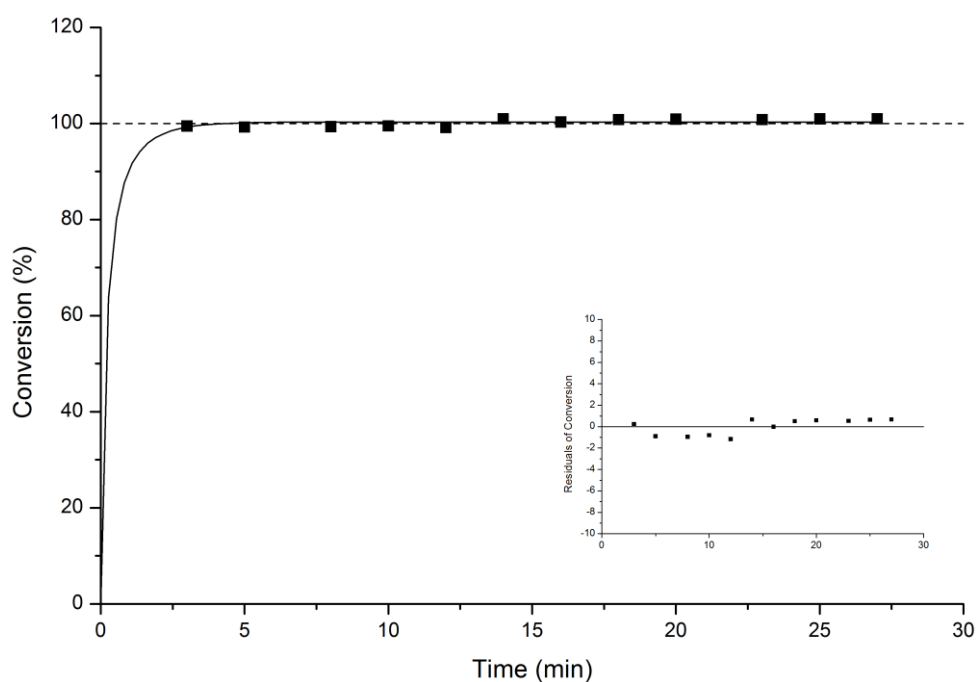

**Figure S46** Conversion vs time plot of **4b** with 1.2 equiv of  $\text{Et}_3\text{N}$  (**3b**), 1.2 equiv TBSOTf (**1b**), and no catalyst in  $\text{DMF-d}_7$ .

$$R^2 = 0.9944$$

$$k_{\text{eff}} = 4.681$$

$$t_{1/2} = 0.164 \text{ min}$$

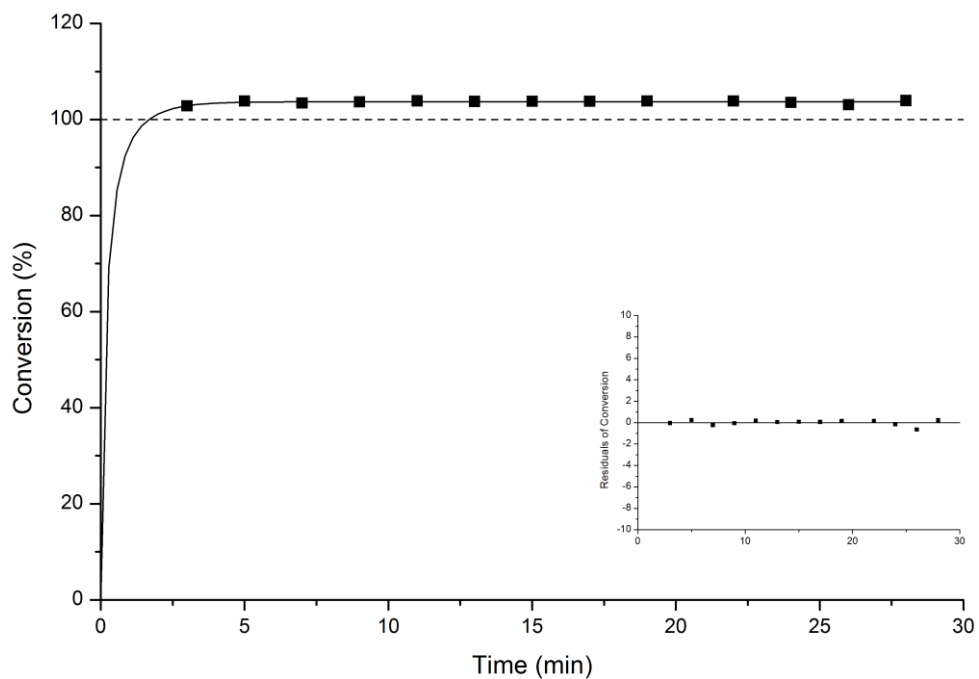

**Figure 47** Second conversion vs time plot of **4b** with 1.2 equiv of Et<sub>3</sub>N (**3b**), 1.2 equiv TBSOTf (**1b**), and no catalyst in DMF-d<sub>7</sub>.

$$R^2 = 0.9987$$

$$k_{\text{eff}} = 5.084$$

$$t_{1/2} = 0.151 \text{ min}$$

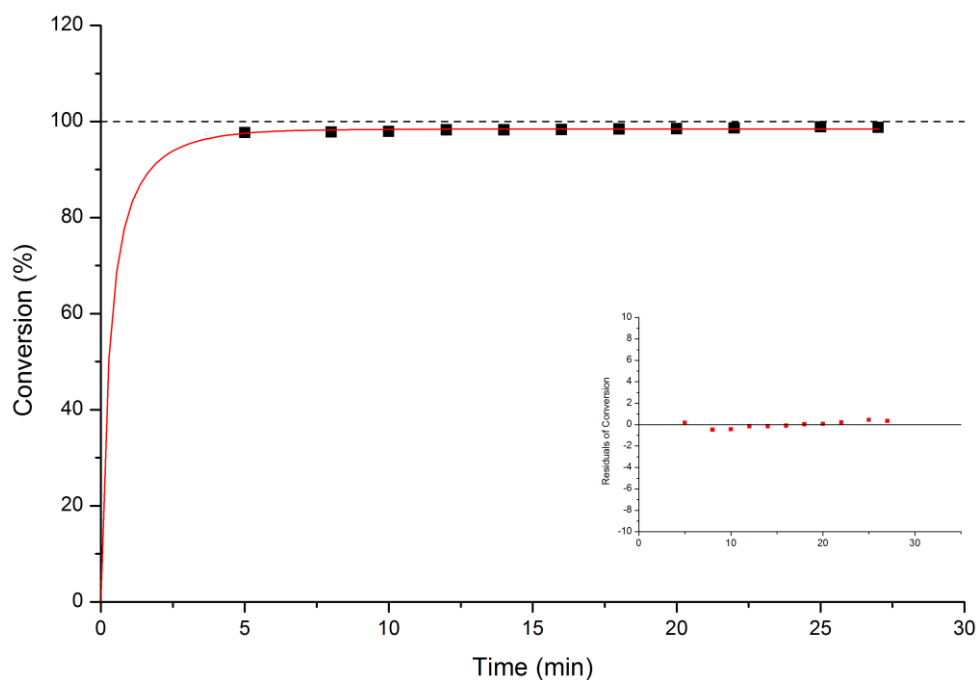

**Figure S48** Conversion vs time plot of **4b** with 1.2 equiv of Et<sub>3</sub>N (**3b**), 1.2 equiv TBSOTf (**1b**), and no catalyst in CDCl<sub>3</sub>.

$$R^2 = 0.3241$$

$$k_{\text{eff}} = 2.979$$

$$t_{1/2} = 0.258 \text{ min}$$

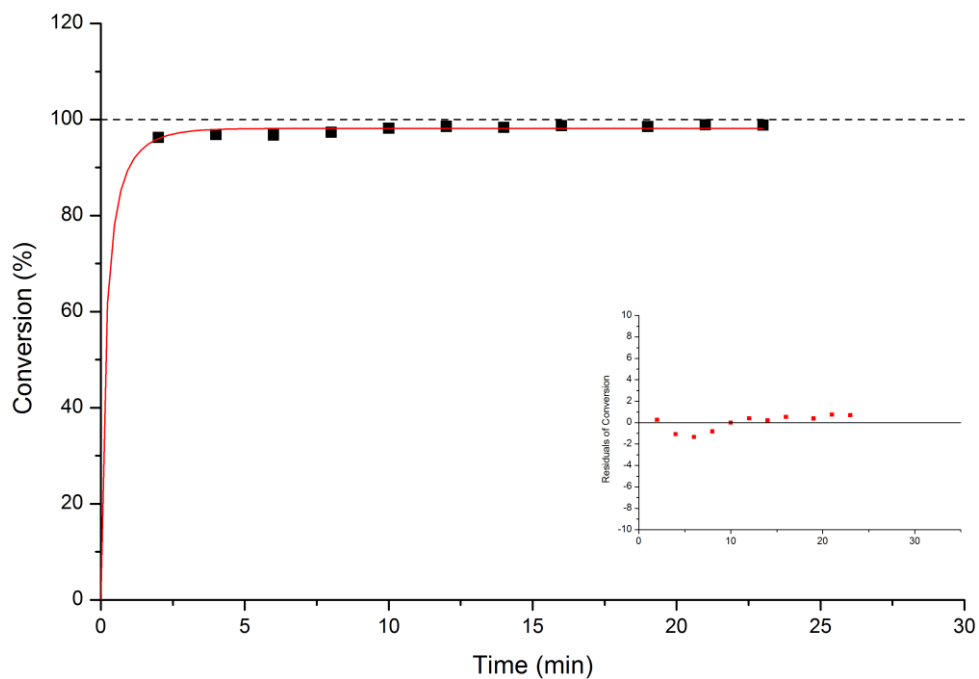

**Figure S49** Second conversion vs time plot of **4b** with 1.2 equiv of Et<sub>3</sub>N (**3b**), 1.2 equiv TBSOTf (**1b**), and no catalyst in CDCl<sub>3</sub>.

$$R^2 = 0.33046$$

$$k_{\text{eff}} = 5.3482$$

$$t_{1/2} = 0.144 \text{ min}$$

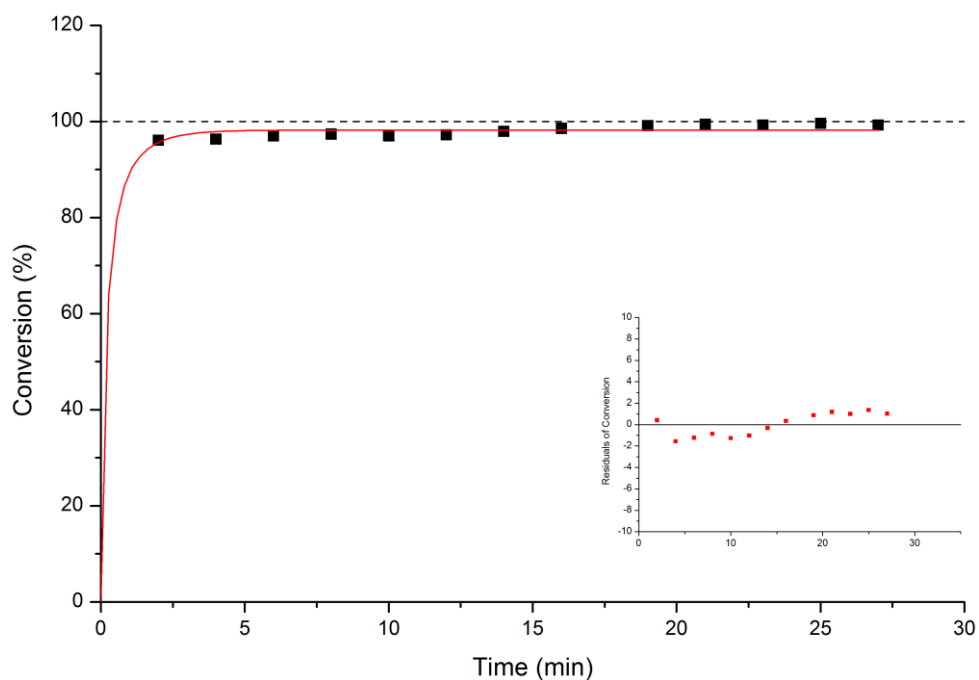

**Figure S50** Third conversion vs time plot of **4b** with 1.2 equiv of Et<sub>3</sub>N (**3b**), 1.2 equiv TBSOTf (**1b**), and no catalyst in CDCl<sub>3</sub>.

$$R^2 = 0.2043$$

$$k_{\text{eff}} = 4.9206$$

$$t_{1/2} = 0.156 \text{ min}$$

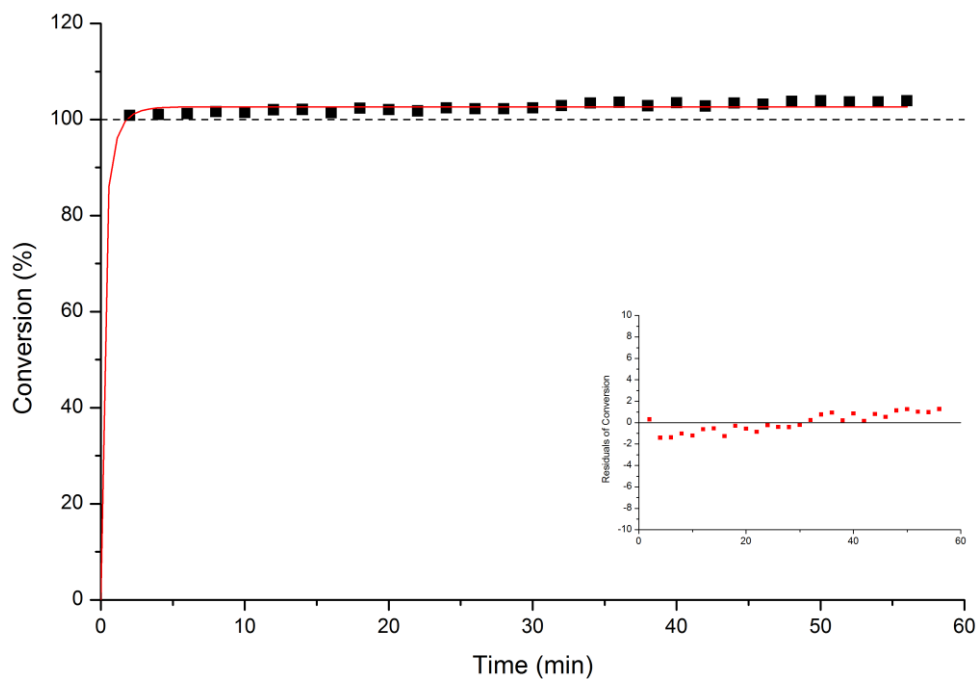

**Figure S51** Conversion vs time plot of **4b** with 1.2 equiv of Et<sub>3</sub>N (**3b**), 1.2 equiv TBSOTf (**1b**), and 10 mol% DMAP as catalyst in CDCl<sub>3</sub>.

$$R^2 = 0.11972$$

$$k_{\text{eff}} = 5.4947$$

$$t_{1/2} = 0.140 \text{ min}$$

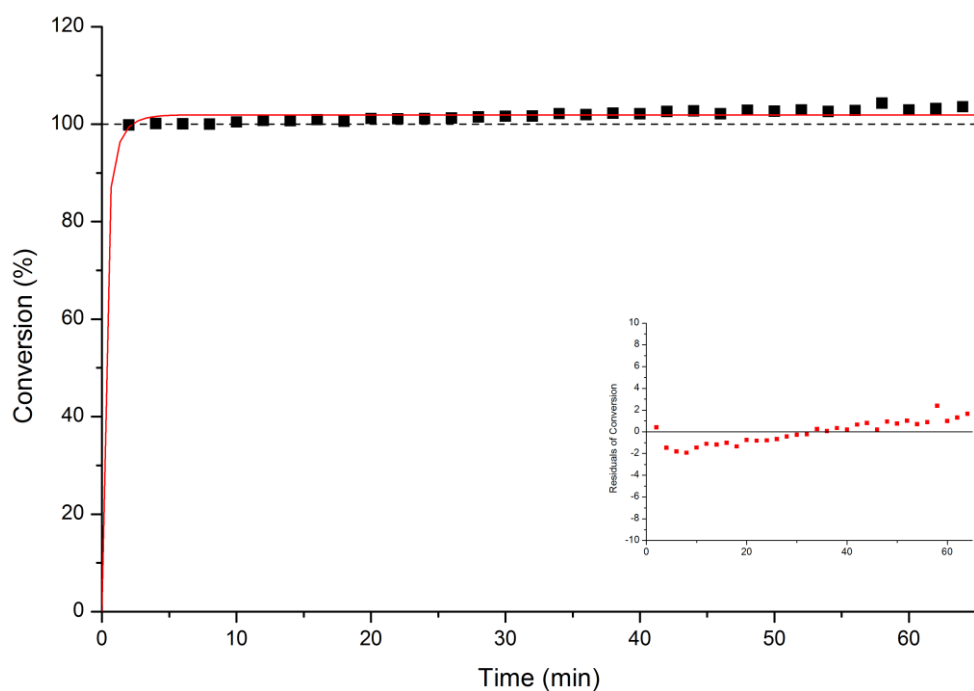

**Figure S52** Second conversion vs time plot of **4b** with 1.2 equiv of Et<sub>3</sub>N (**3b**), 1.2 equiv TBSOTf (**1b**), and 10 mol% DMAP as catalyst in CDCl<sub>3</sub>.

$$R^2 = 0.0862$$

$$k_{\text{eff}} = 5.0958$$

$$t_{1/2} = 0.151 \text{ min}$$

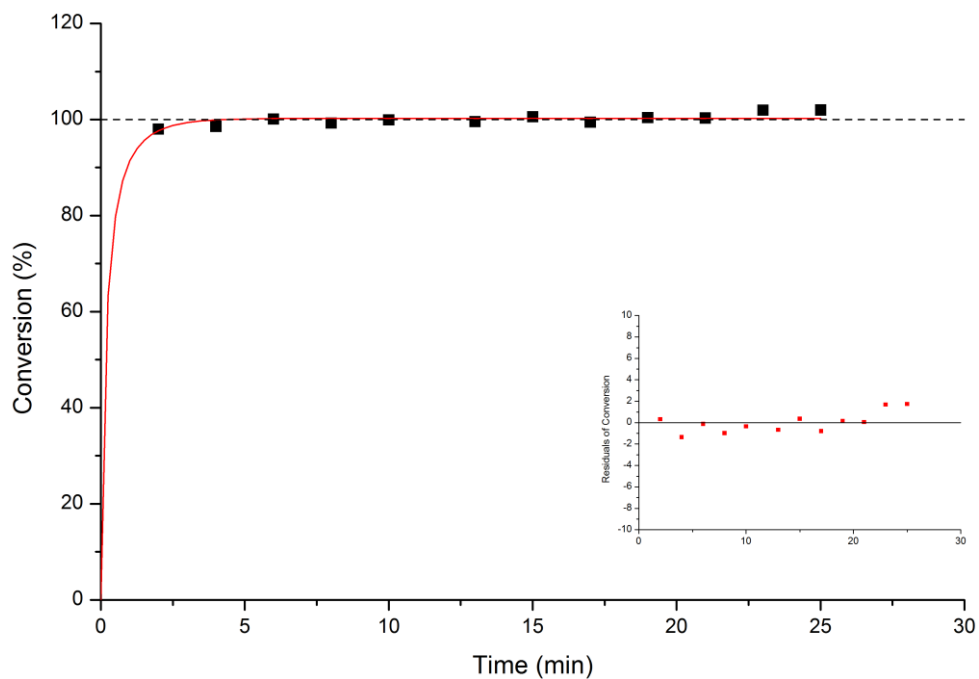

**Figure S53** Conversion vs time plot of **4b** with 1.2 equiv of Et<sub>3</sub>N (**3b**), 1.2 equiv TBSOTf (**1b**), and 20 mol% DMAP as catalyst in CDCl<sub>3</sub>.

$$R^2 = 0.2780$$

$$k_{\text{eff}} = 4.974$$

$$t_{1/2} = 0.154 \text{ min}$$

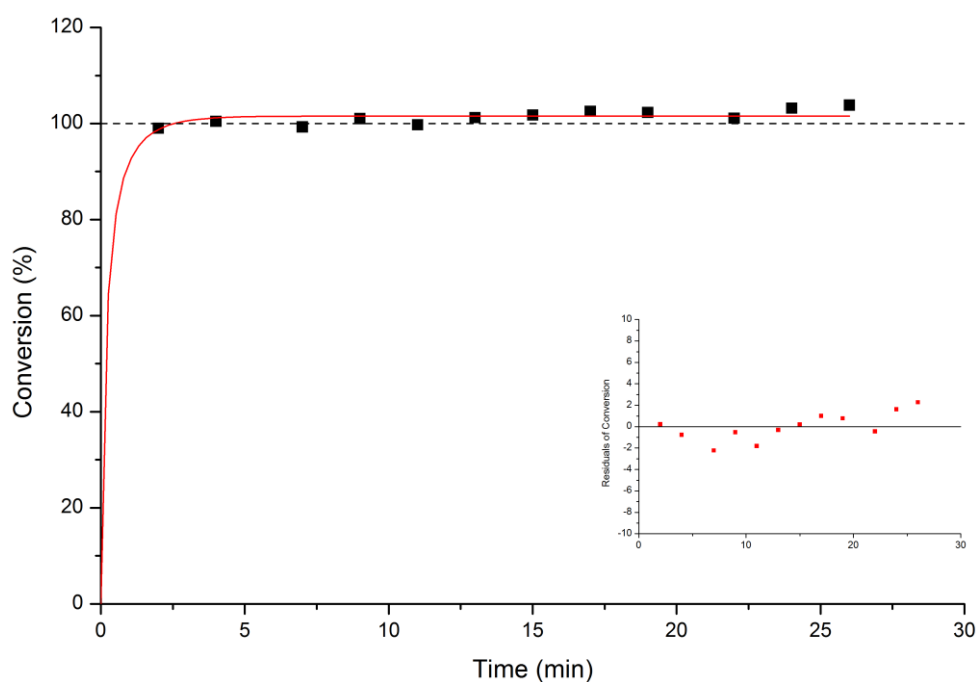

**Figure S54** Second Conversion vs time plot of **4b** with 1.2 equiv of Et<sub>3</sub>N (**3b**), 1.2 equiv TBSOTf (**1b**), and 20 mol% DMAP as catalyst in CDCl<sub>3</sub>.

$$R^2 = 0.1758$$

$$k_{\text{eff}} = 4.848$$

$$t_{1/2} = 0.158 \text{ min}$$

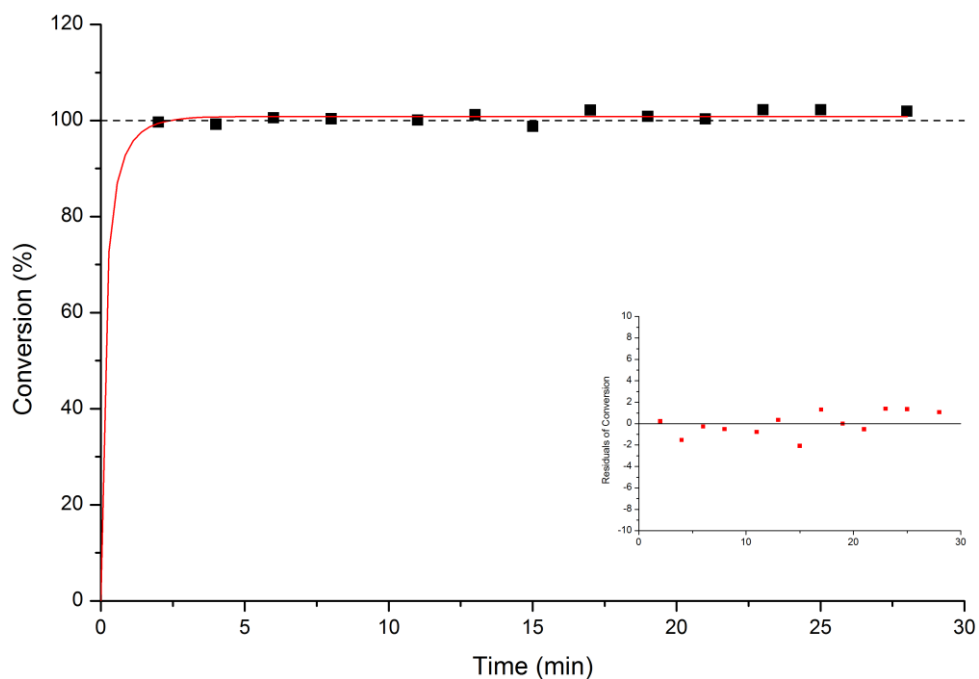

**Figure S55** Third Conversion vs time plot of **4b** with 1.2 equiv of Et<sub>3</sub>N (**3b**), 1.2 equiv TBSOTf (**1b**), and 20 mol% DMAP as catalyst in CDCl<sub>3</sub>.

$$R^2 = 0.0170$$

$$k_{\text{eff}} = 6.3133$$

$$t_{1/2} = 0.122 \text{ min}$$

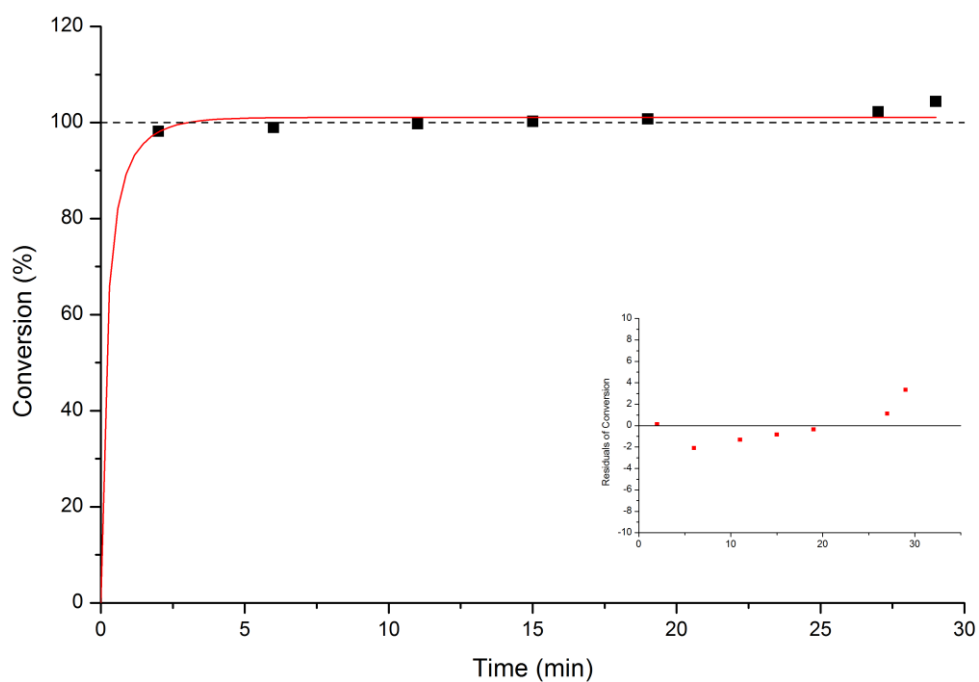

**Figure S56** Conversion vs time plot of **4b** with 1.2 equiv of Et<sub>3</sub>N (**3b**), 1.2 equiv TBSOTf (**1b**), and 30 mol% DMAP as catalyst in CDCl<sub>3</sub>.

$$R^2 = 0.1333$$

$$k_{\text{eff}} = 4.629$$

$$t_{1/2} = 0.166 \text{ min}$$

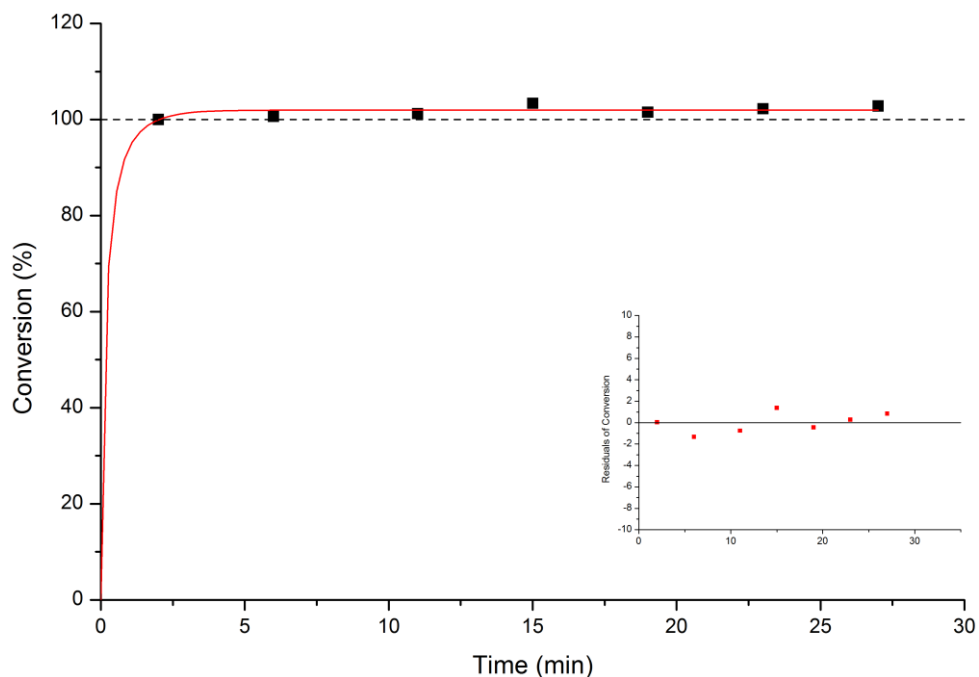

**Figure S57** Second Conversion vs time plot of **4b** with 1.2 equiv of Et<sub>3</sub>N (**3b**), 1.2 equiv TBSOTf (**1b**), and 30 mol% DMAP as catalyst in CDCl<sub>3</sub>.

$$R^2 = 0.2728$$

$$k_{\text{eff}} = 5.566$$

$$t_{1/2} = 0.138 \text{ min}$$

#### 4.1.3 Measurements with TBSCN (**1c**)

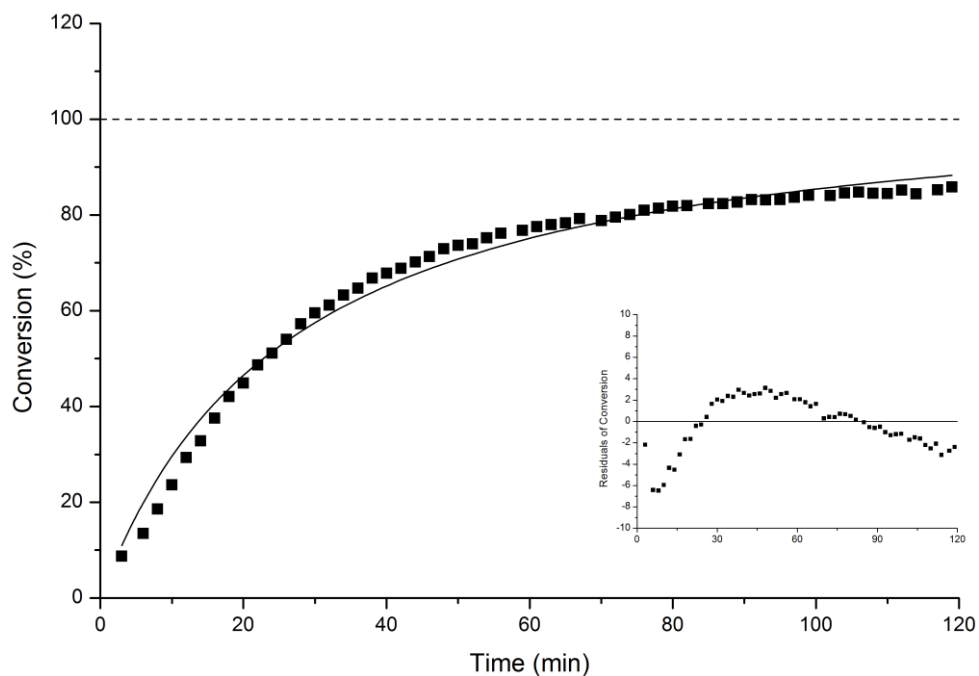

**Figure S58** Conversion vs time plot of **4b** with 1.2 equiv of Et<sub>3</sub>N (**3b**), 1.2 equiv TBSCN (**1c**), and 30 mol% DMAP as catalyst in DMF-d<sub>7</sub>.

$$R^2 = 0.9960$$

$$k_{\text{eff}} = 0.0452$$

$$t_{1/2} = 17.0 \text{ min}$$

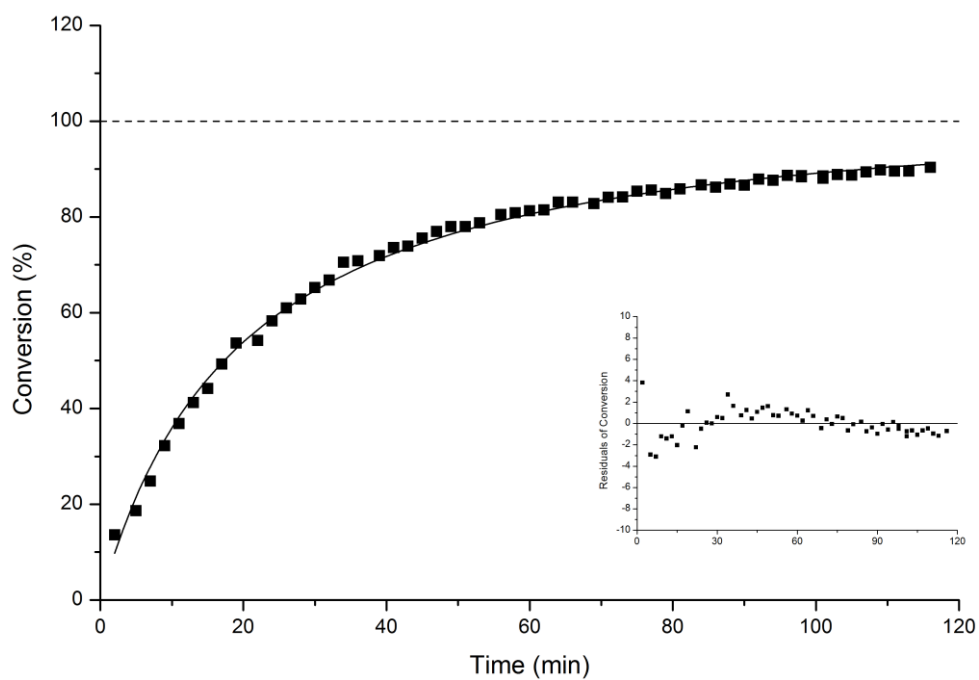

**Figure S59** Second conversion vs time plot of **4b** with 1.2 equiv of Et<sub>3</sub>N (**3b**), 1.2 equiv TBSCN (**1c**), and 30 mol% DMAP as catalyst in DMF-d<sub>7</sub>.

$$R^2 = 0.9848$$

$$k_{\text{eff}} = 0.03377$$

$$t_{1/2} = 22.7 \text{ min}$$

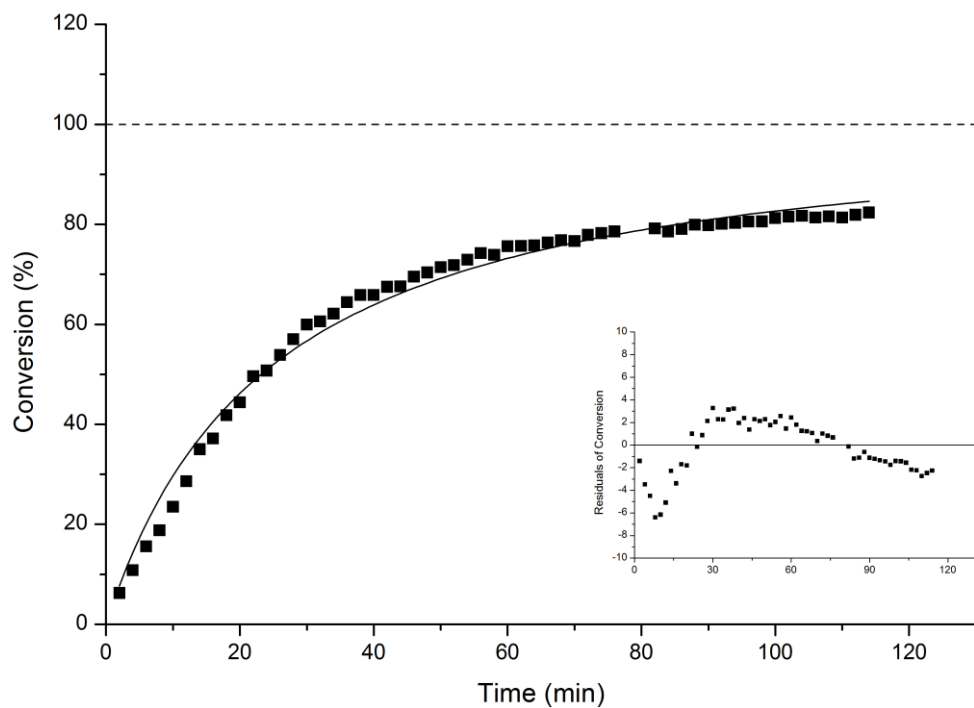

**Figure S60** Conversion vs time plot of **4b** with 1.2 equiv of Et<sub>3</sub>N (**3b**), 1.2 equiv TBSCN (**1c**), and no catalyst in DMF-d<sub>7</sub>.

$$R^2 = 0.9861$$

$$k_{\text{eff}} = 3.619 \times 10^{-2}$$

$$t_{1/2} = 21.2 \text{ min}$$



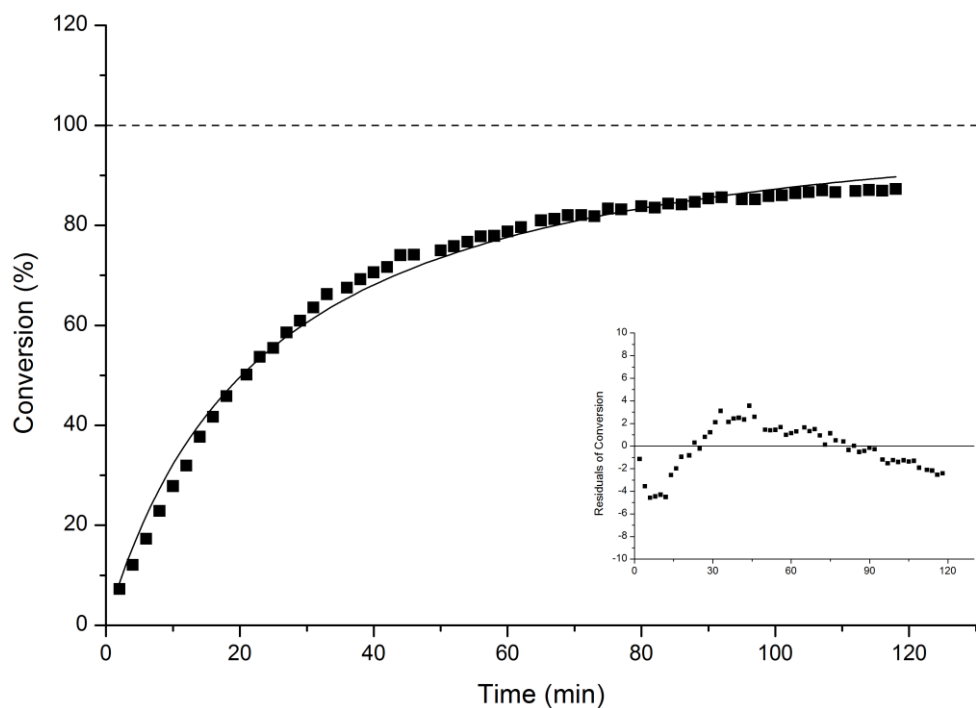

**Figure S61** Second conversion vs time plot of **4b** with 1.2 equiv of Et<sub>3</sub>N (**3b**), 1.2 equiv TBSCN (**1c**), and no catalyst in DMF-d<sub>7</sub>.

$$R^2 = 0.99096$$

$$k_{\text{eff}} = 3.802 \times 10^{-2}$$

$$t_{1/2} = 20.2 \text{ min}$$

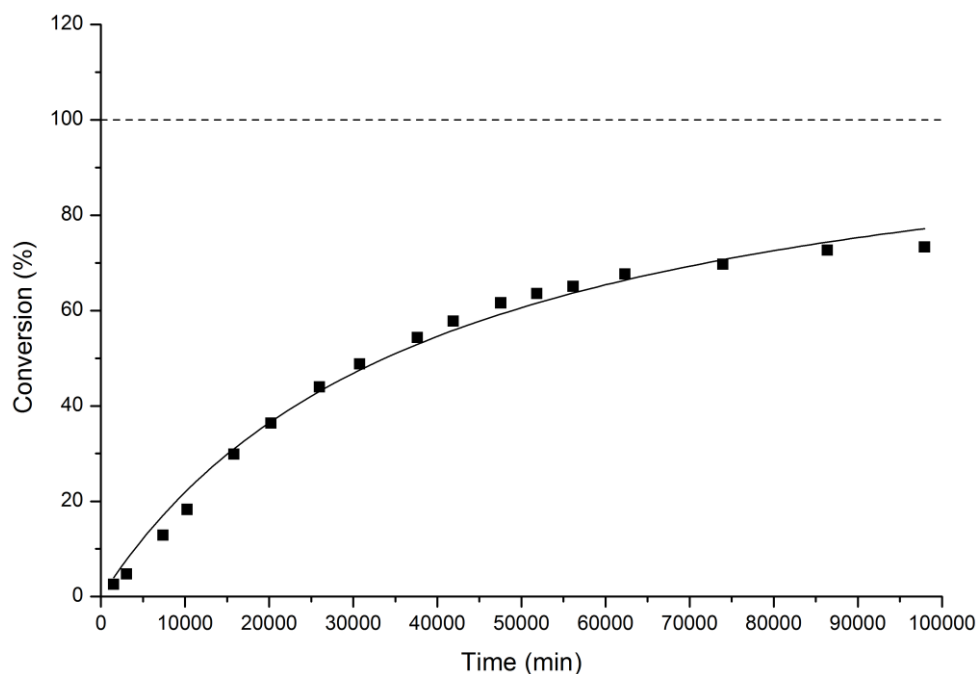

**Figure S62** Conversion vs time plot of **4b** with 1.2 equiv of Et<sub>3</sub>N (**3b**), 1.2 equiv TBSCN (**1c**), and 10 mol% DMAP as catalyst in CDCl<sub>3</sub>.

$$R^2 = 0.99029$$

$$k_{\text{eff}} = 2.283 \times 10^{-5}$$

$$t_{1/2} = 33634.8 \text{ min}$$

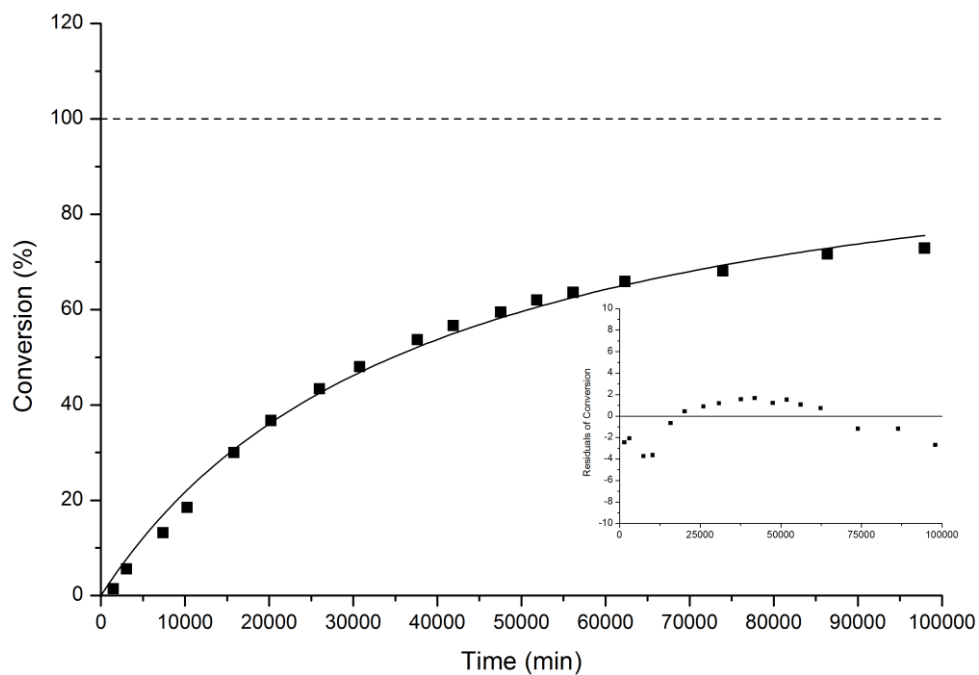

**Figure S63** Second conversion vs time plot of **4b** with 1.2 equiv of Et<sub>3</sub>N (**3b**), 1.2 equiv TBSCN (**1c**), and 10 mol% DMAP as catalyst in CDCl<sub>3</sub>.

$$R^2 = 0.99274$$

$$k_{\text{eff}} = 2.340 \times 10^{-5}$$

$$t_{1/2} = 32810.4 \text{ min}$$

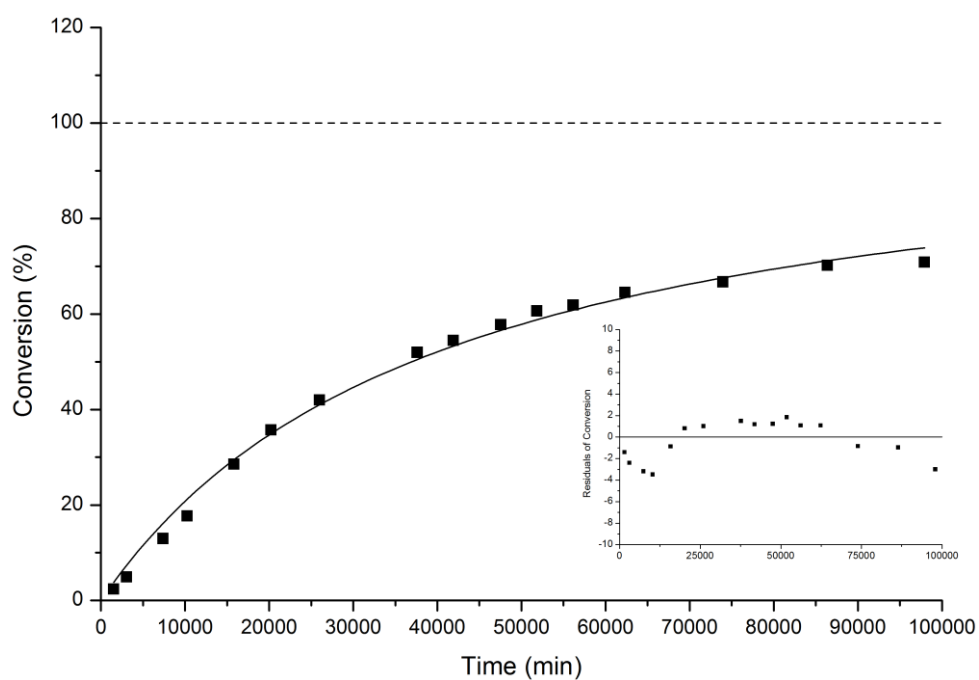

**Figure S64** Third conversion vs time plot of **4b** with 1.2 equiv of Et<sub>3</sub>N (**3b**), 1.2 equiv TBSCN (**1c**), and 10 mol% DMAP as catalyst in CDCl<sub>3</sub>.

$$R^2 = 0.9932$$

$$k_{\text{eff}} = 2.244 \times 10^{-5}$$

$$t_{1/2} = 34212.9.0 \text{ min}$$

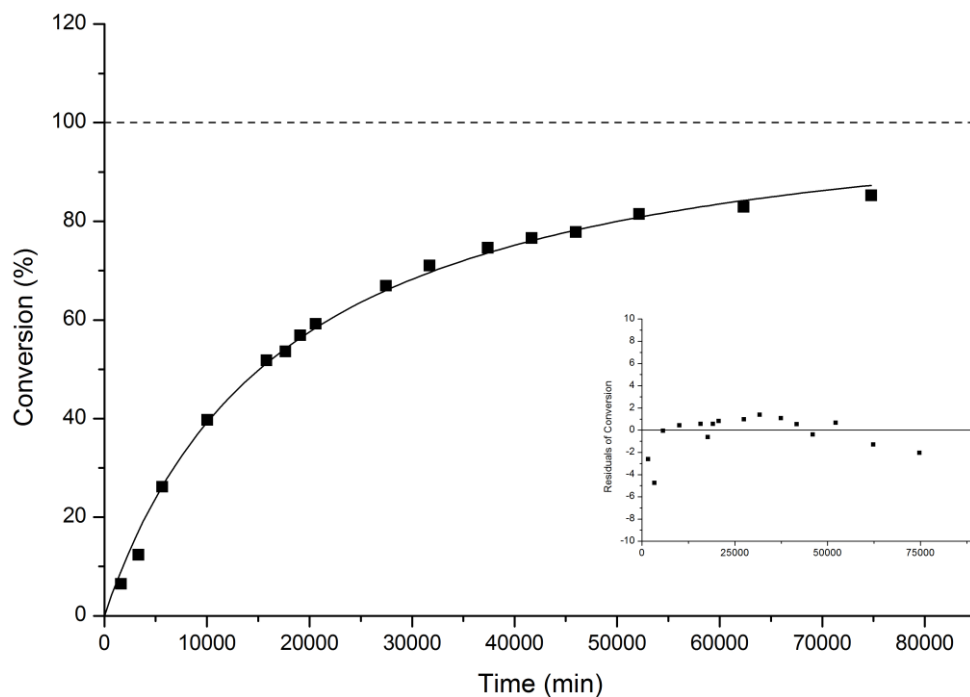

**Figure S65** Conversion vs time plot of **4b** with 1.2 equiv of Et<sub>3</sub>N (**3b**), 1.2 equiv TBSCN (**1c**), and 20 mol% DMAP as catalyst in CDCl<sub>3</sub>.

$$R^2 = 0.99517$$

$$k_{\text{eff}} = 5.100 \times 10^{-5}$$

$$t_{1/2} = 15055.0 \text{ min}$$

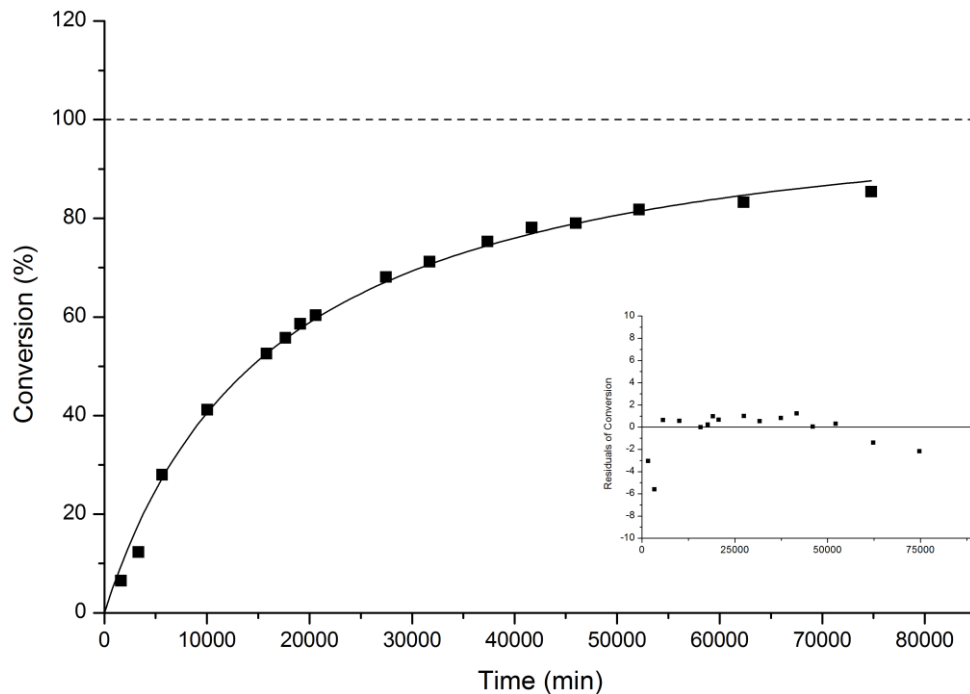

**Figure S66** Second conversion vs time plot of **4b** with 1.2 equiv of Et<sub>3</sub>N (**3b**), 1.2 equiv TBSCN (**1c**), and 20 mol% DMAP as catalyst in CDCl<sub>3</sub>.

$$R^2 = 0.9938$$

$$k_{\text{eff}} = 5.446 \times 10^{-5}$$

$$t_{1/2} = 14098.8 \text{ min}$$

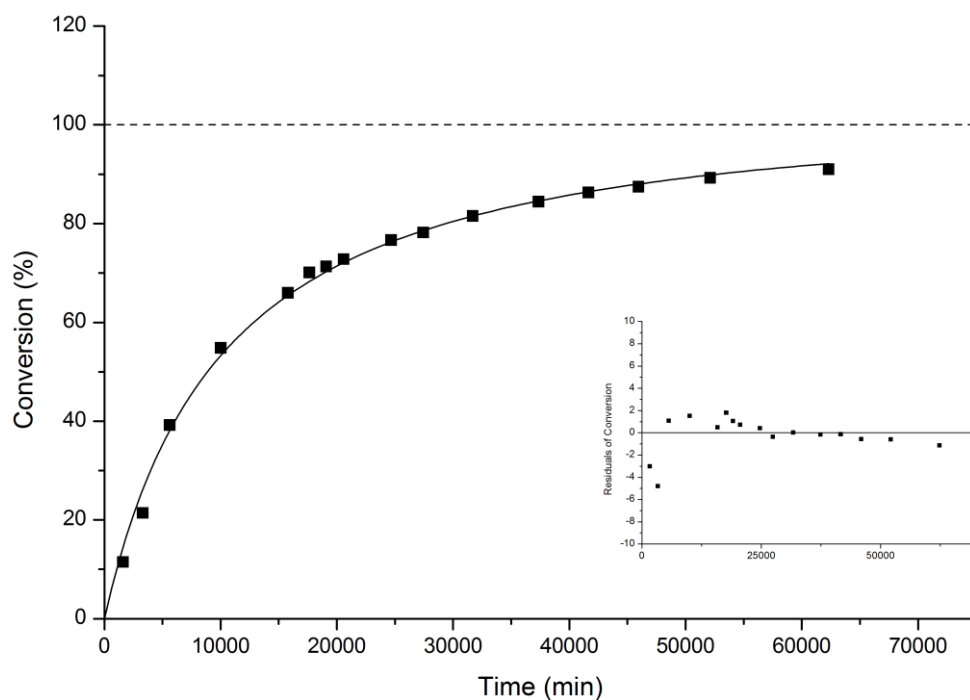

**Figure S67** Conversion vs time plot of **4b** with 1.2 equiv of Et<sub>3</sub>N (**3b**), 1.2 equiv TBSCN (**1c**), and 30 mol% DMAP as catalyst in CDCl<sub>3</sub>.

$$R^2 = 0.9947$$

$$k_{\text{eff}} = 8.6942 \times 10^{-5}$$

$$t_{1/2} = 8832.5 \text{ min}$$

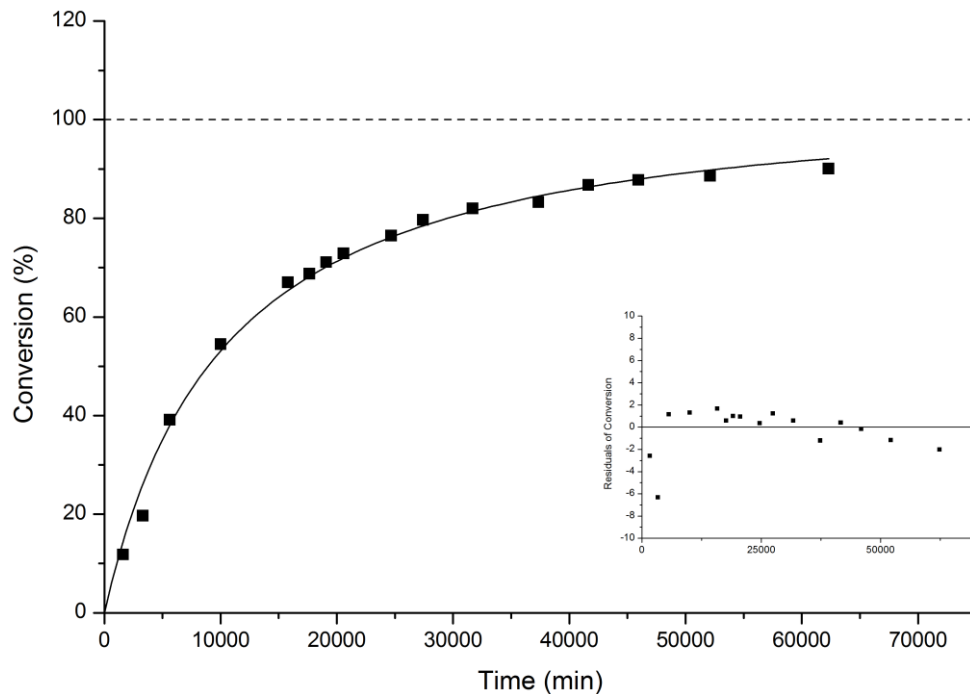

**Figure S68** Second conversion vs time plot of **4b** with 1.2 equiv of Et<sub>3</sub>N (**3b**), 1.2 equiv TBSCN (**1c**), and 30 mol% DMAP as catalyst in CDCl<sub>3</sub>.

$$R^2 = 0.9922$$

$$k_{\text{eff}} = 8.649 \times 10^{-5}$$

$$t_{1/2} = 8878.4 \text{ min}$$

#### 4.1.3.1 Primary Alcohol (**4a**)

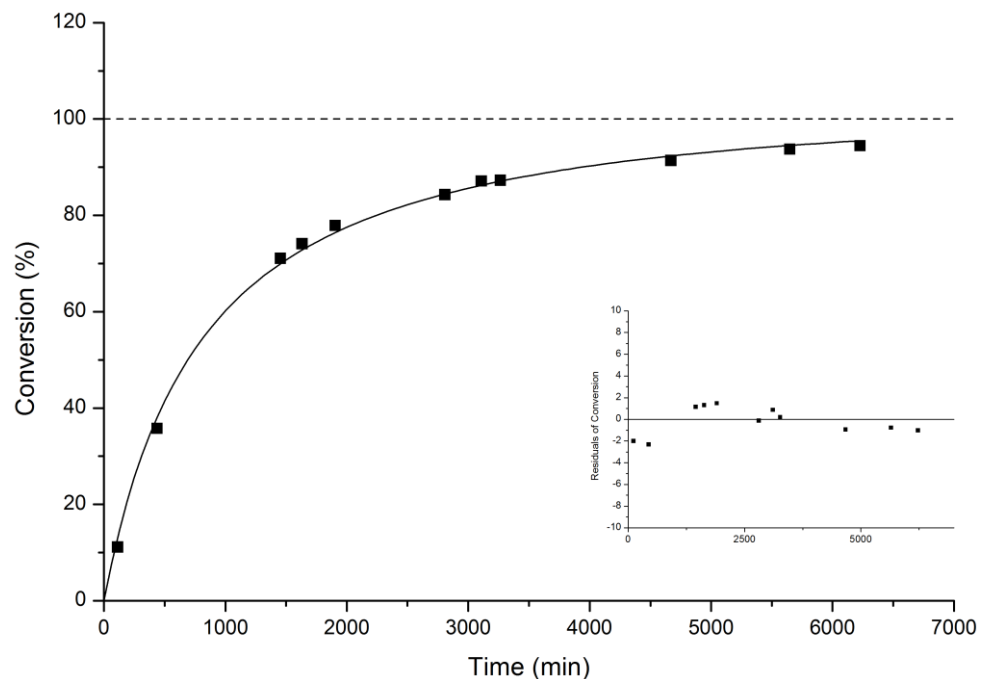

**Figure S69** Conversion vs time plot of **4a** with 1.2 equiv of Et<sub>3</sub>N (**3b**), 1.2 equiv TBSCN (**1c**), and 1 mol% DMAP as catalyst in CDCl<sub>3</sub>.

$$R^2 = 0.9971$$

$$k_{\text{eff}} = 1.10 \times 10^{-3}$$

$$t_{1/2} = 698.1 \text{ min}$$

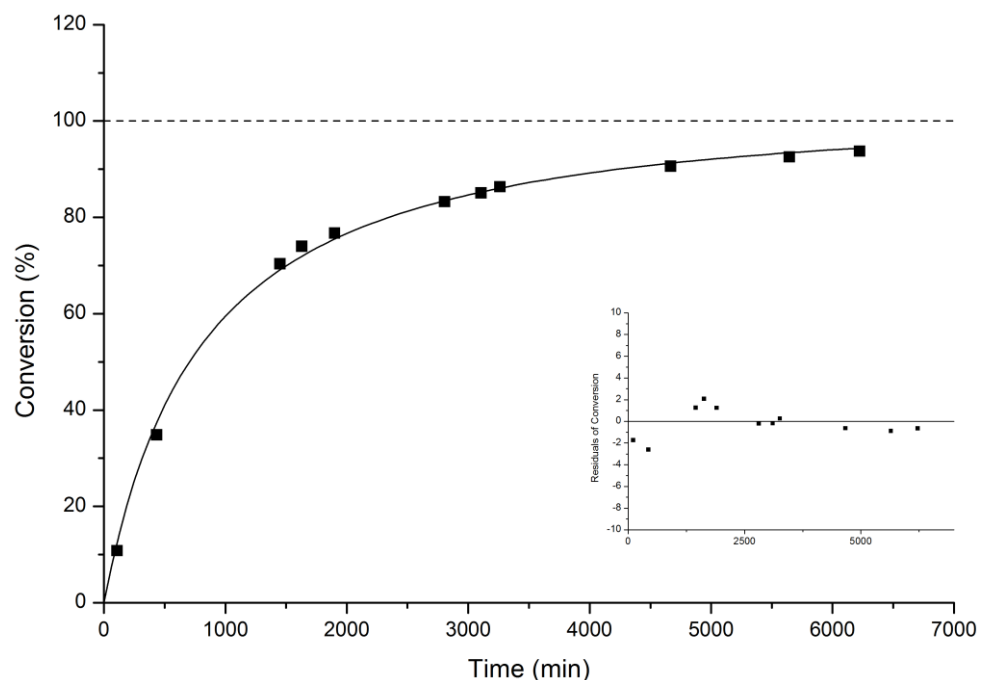

**Figure S70** Second conversion vs time plot of **4a** with 1.2 equiv of Et<sub>3</sub>N (**3b**), 1.2 equiv TBSCN (**1c**), and 1 mol% DMAP as catalyst in CDCl<sub>3</sub>.

$$R^2 = 0.9969$$

$$k_{\text{eff}} = 1.10 \times 10^{-3}$$

$$t_{1/2} = 698.1 \text{ min}$$

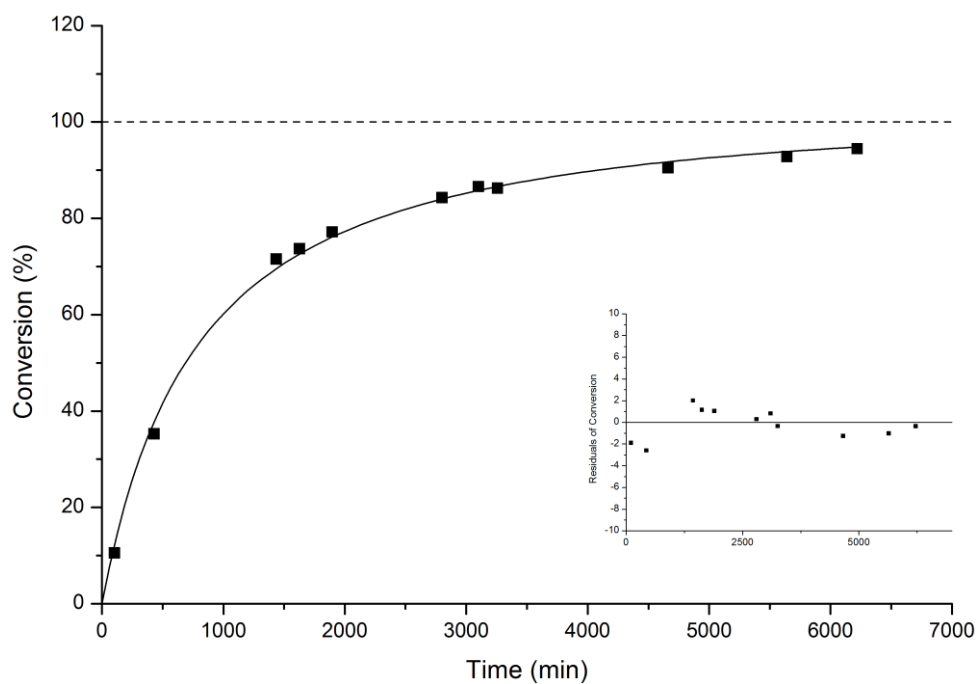

**Figure S71** Third conversion vs time plot of **4a** with 1.2 equiv of Et<sub>3</sub>N (**3b**), 1.2 equiv TBSCN (**1c**), and 1 mol% DMAP as catalyst in CDCl<sub>3</sub>.

$$R^2 = 0.9917$$

$$k_{\text{eff}} = 1.12 \times 10^{-3}$$

$$t_{1/2} = 685.6 \text{ min}$$

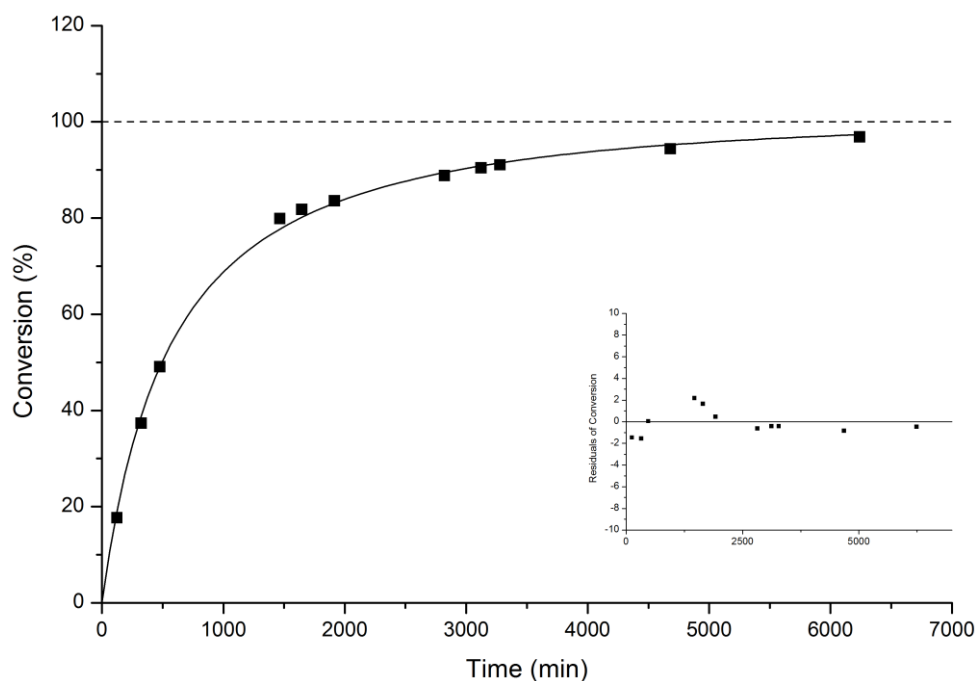

**Figure S72** Conversion vs time plot of **4a** with 1.2 equiv of Et<sub>3</sub>N (**3b**), 1.2 equiv TBSCN (**1c**), and 2 mol% DMAP as catalyst in CDCl<sub>3</sub>.

$$R^2 = 0.9978$$

$$k_{\text{eff}} = 1.56 \times 10^{-3}$$

$$t_{1/2} = 492.2 \text{ min}$$

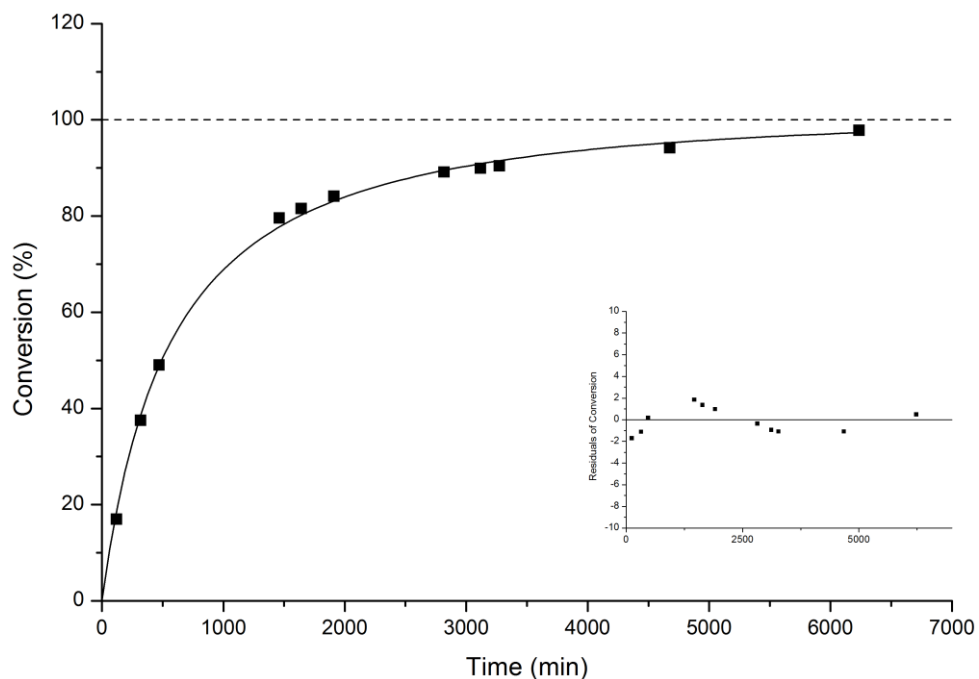

**Figure S73** Second conversion vs time plot of **4a** with 1.2 equiv of Et<sub>3</sub>N (**3b**), 1.2 equiv TBSCN (**1c**), and 2 mol% DMAP as catalyst in CDCl<sub>3</sub>.

$$R^2 = 0.9978$$

$$k_{\text{eff}} = 1.57 \times 10^{-3}$$

$$t_{1/2} = 489.1 \text{ min}$$

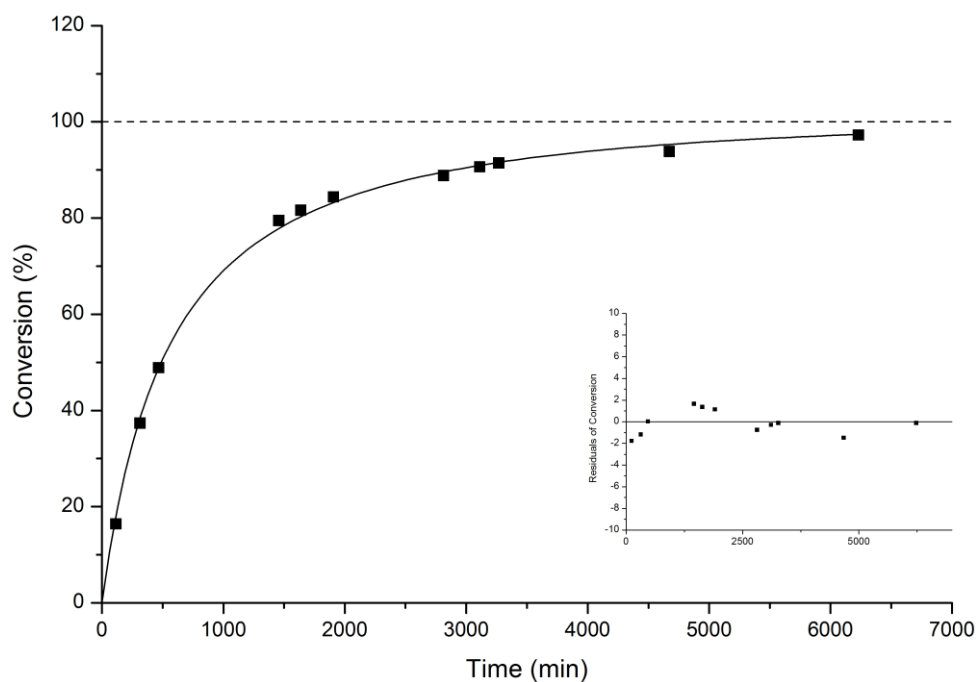

**Figure S74** Third conversion vs time plot of **4a** with 1.2 equiv of Et<sub>3</sub>N (**3b**), 1.2 equiv TBSCN (**1c**), and 2 mol% DMAP as catalyst in CDCl<sub>3</sub>.

$$R^2 = 0.9979$$

$$k_{\text{eff}} = 1.58 \times 10^{-3}$$

$$t_{1/2} = 486.0$$

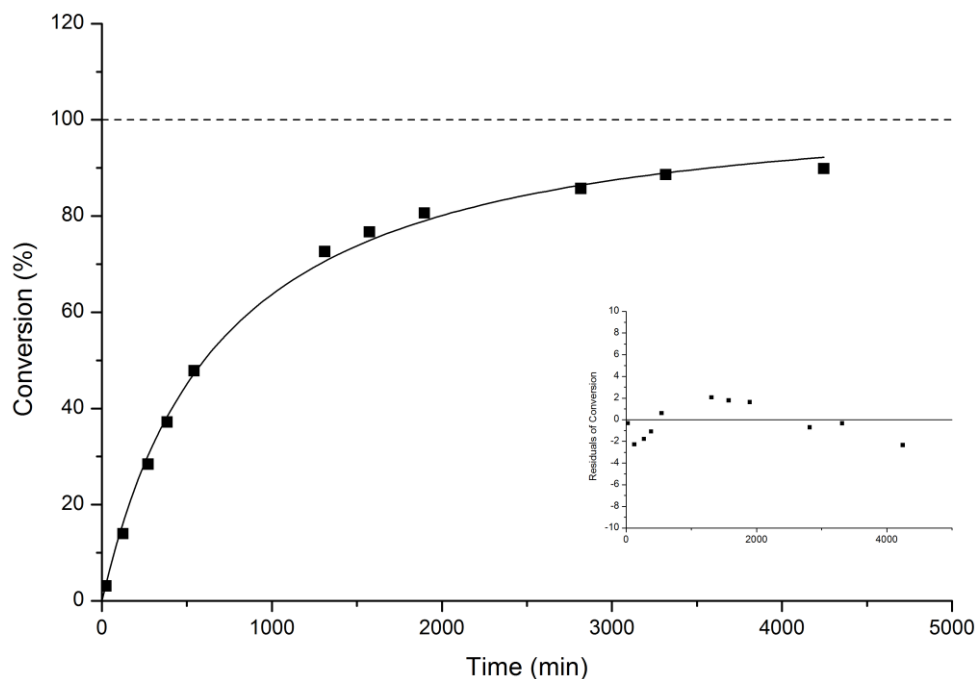

**Figure S75** Conversion vs time plot of **4a** with 1.2 equiv of Et<sub>3</sub>N (**3b**), 1.2 equiv TBSCN (**1c**), and 3 mol% DMAP as catalyst in CDCl<sub>3</sub>.

$$R^2 = 0.9959$$

$$k_{\text{eff}} = 1.20 \times 10^{-3}$$

$$t_{1/2} = 639.9$$

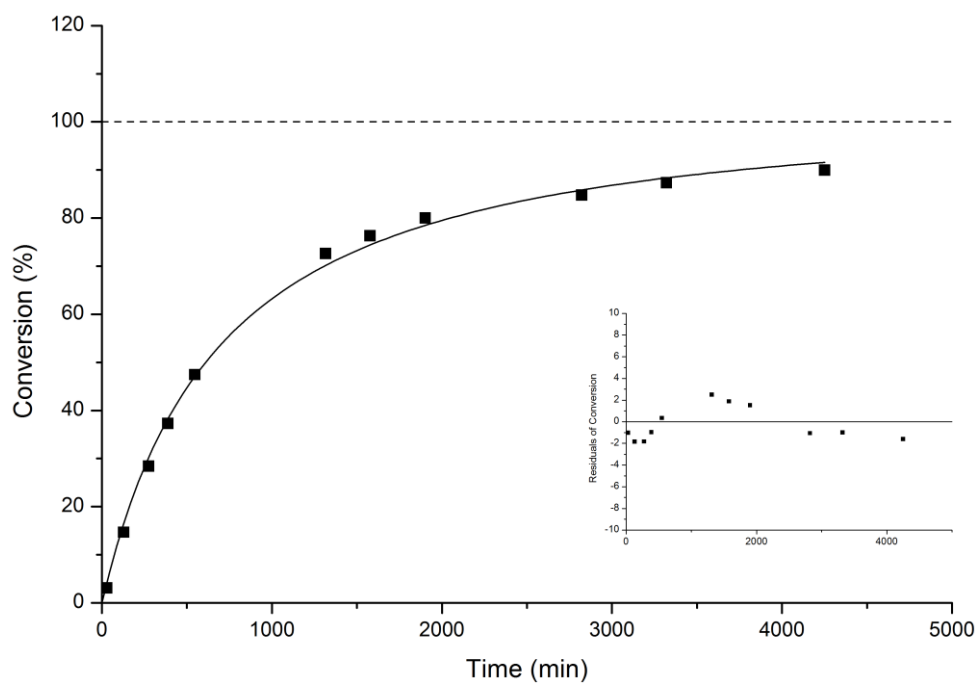

**Figure S76** Second conversion vs time plot of **4a** with 1.2 equiv of Et<sub>3</sub>N (**3b**), 1.2 equiv TBSCN (**1c**), and 3 mol% DMAP as catalyst in CDCl<sub>3</sub>.

$$R^2 = 0.9971$$

$$k_{\text{eff}} = 1.28 \times 10^{-3}$$

$$t_{1/2} = 599.9$$



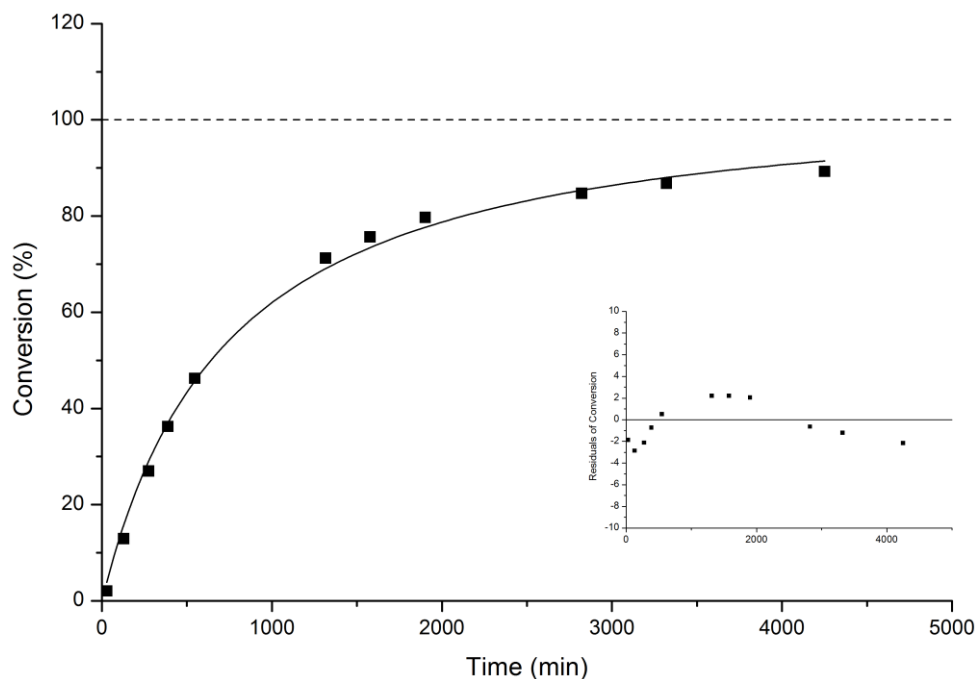

**Figure S77** Third conversion vs time plot of **4a** with 1.2 equiv of Et<sub>3</sub>N (**3b**), 1.2 equiv TBSCN (**1c**), and 3 mol% DMAP as catalyst in CDCl<sub>3</sub>.

$$R^2 = 0.9975$$

$$k_{\text{eff}} = 1.20 \times 10^{-3}$$

$$t_{1/2} = 639.9$$

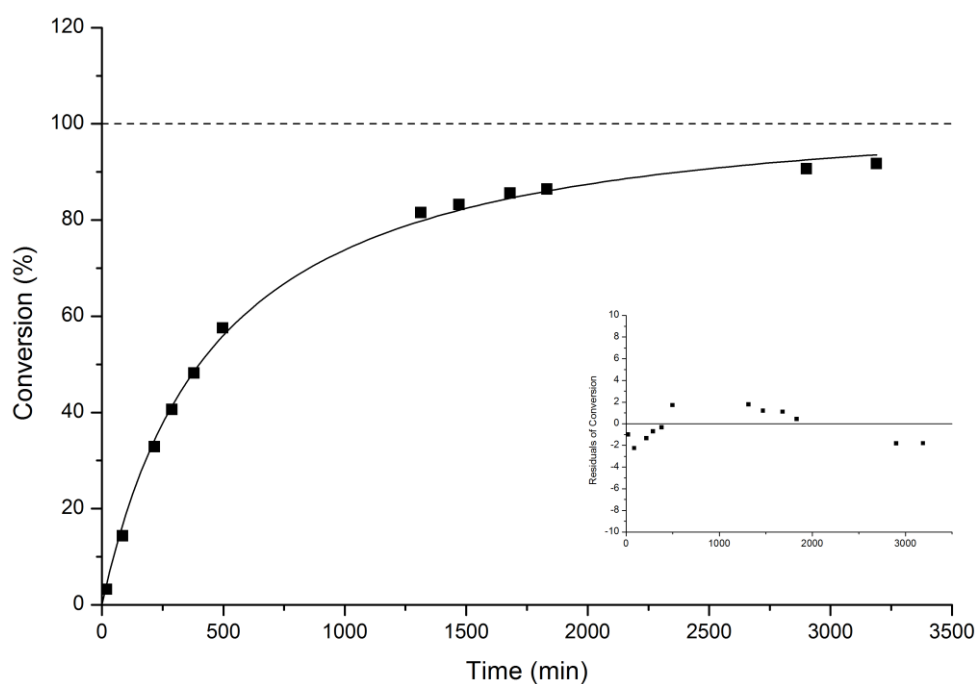

**Figure S78** Conversion vs time plot of **4a** with 1.2 equiv of Et<sub>3</sub>N (**3b**), 1.2 equiv TBSCN (**1c**), and 4 mol% DMAP as catalyst in CDCl<sub>3</sub>.

$$R^2 = 0.9975$$

$$k_{\text{eff}} = 1.92 \times 10^{-3}$$

$$t_{1/2} = 399.9 \text{ min}$$

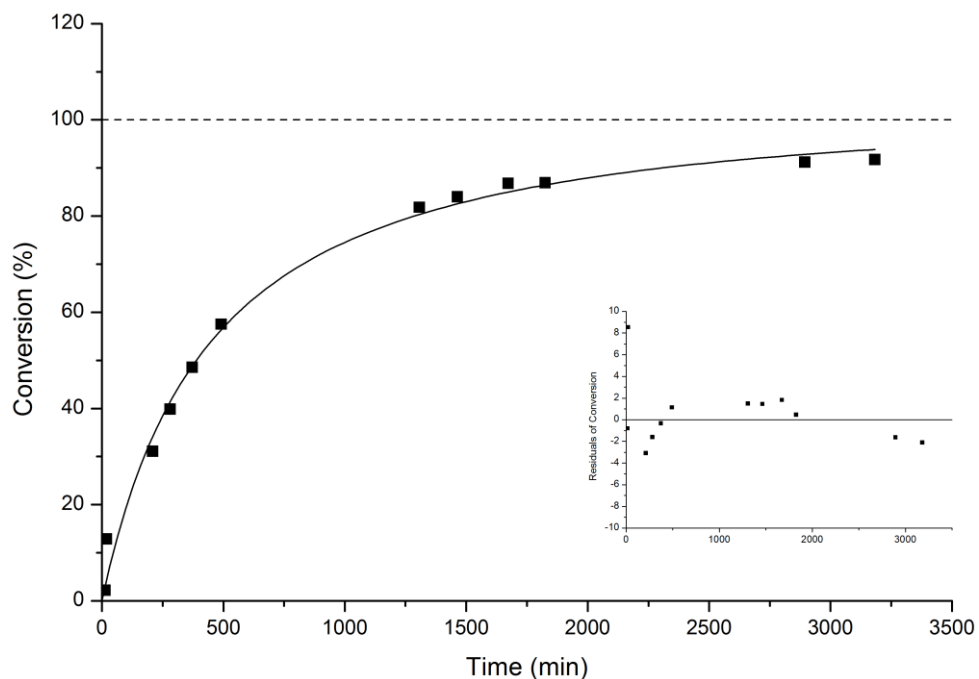

**Figure S79** Second conversion vs time plot of **4a** with 1.2 equiv of Et<sub>3</sub>N (**3b**), 1.2 equiv TBSCN (**1c**), and 4 mol% DMAP as catalyst in CDCl<sub>3</sub>.

$$R^2 = 0.9901$$

$$k_{\text{eff}} = 1.99 \times 10^{-3}$$

$$t_{1/2} = 385.9 \text{ min}$$

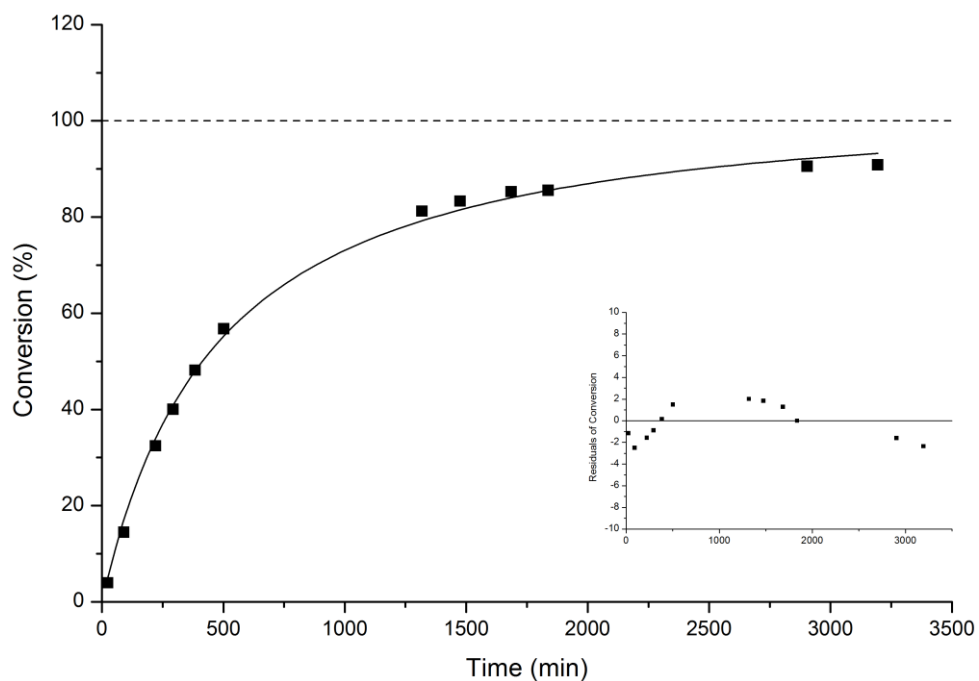

**Figure S80** Third conversion vs time plot of **4a** with 1.2 equiv of Et<sub>3</sub>N (**3b**), 1.2 equiv TBSCN (**1c**), and 4 mol% DMAP as catalyst in CDCl<sub>3</sub>.

$$R^2 = 0.9968$$

$$k_{\text{eff}} = 1.87 \times 10^{-3}$$

$$t_{1/2} = 410.6 \text{ min}$$

#### 4.1.4 Measurements with MTBSTFA (**1e**)

Due to impurities in the reagent MTBSTFA (**1e**) in the region of the product in the NMR spectra at  $t=0$ , determined by a separate measurement in DMF- $d_7$ , the measured conversion is obtained too high (5 % yield enhancement) based on this impurity. Therefore, this amount was removed from the determined yield in order to correct this values. The yields with this reagent were obtained in a rather low area compared to the other reagents. This effect was only observed in DMF- $d_7$  and was not found in  $CDCl_3$ .

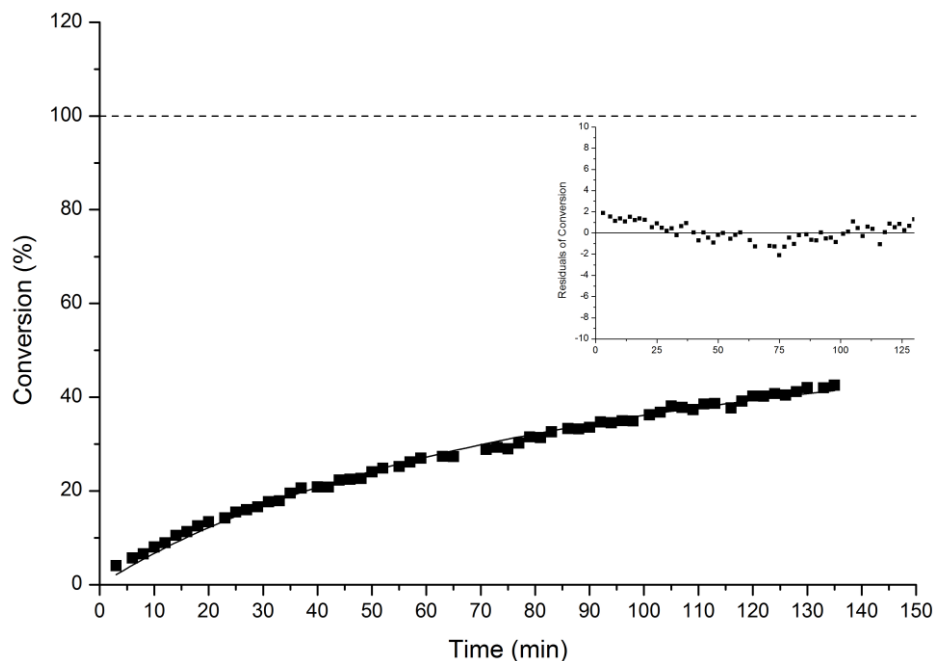

**Figure S81** Conversion vs time plot of **4a** with 1.2 equiv of  $Et_3N$  (**3b**), 1.2 equiv MTBSTFA (**1e**) and no catalyst in DMF- $d_7$ .

$$R^2 = 0.9816$$

$$k_{eff} = 9.35 \times 10^{-3}$$

$$t_{1/2} = 82.1 \text{ min}$$

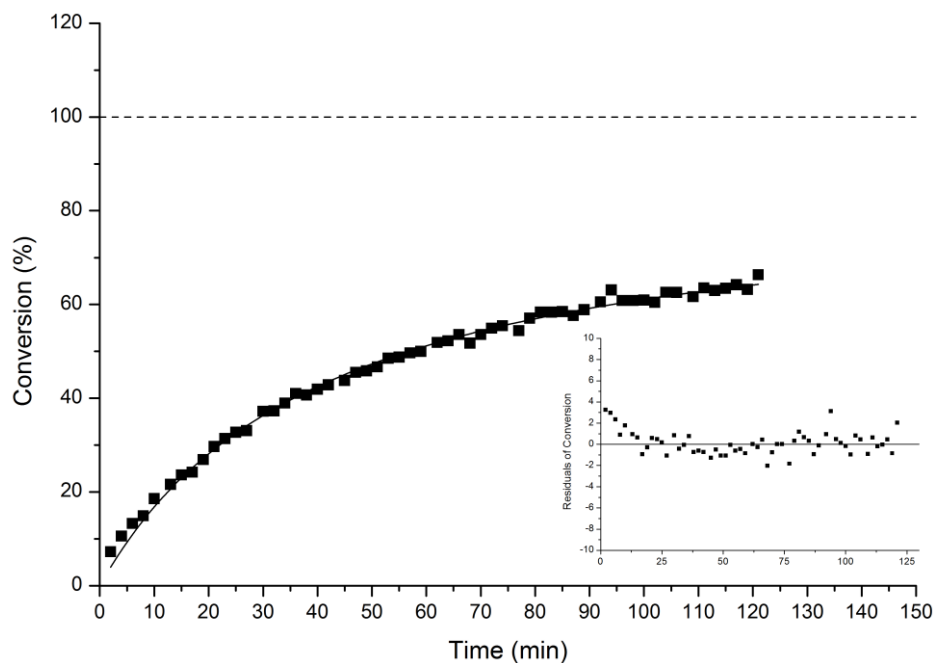

**Figure S82** Second conversion vs time plot of **4a** with 1.2 equiv of  $Et_3N$  (**3b**), 1.2 equiv MTBSTFA (**1e**), and no catalyst in DMF- $d_7$ .

$$R^2 = 0.9778$$

$$k_{eff} = 2.177 \times 10^{-3}$$

$$t_{1/2} = 35.3 \text{ min}$$

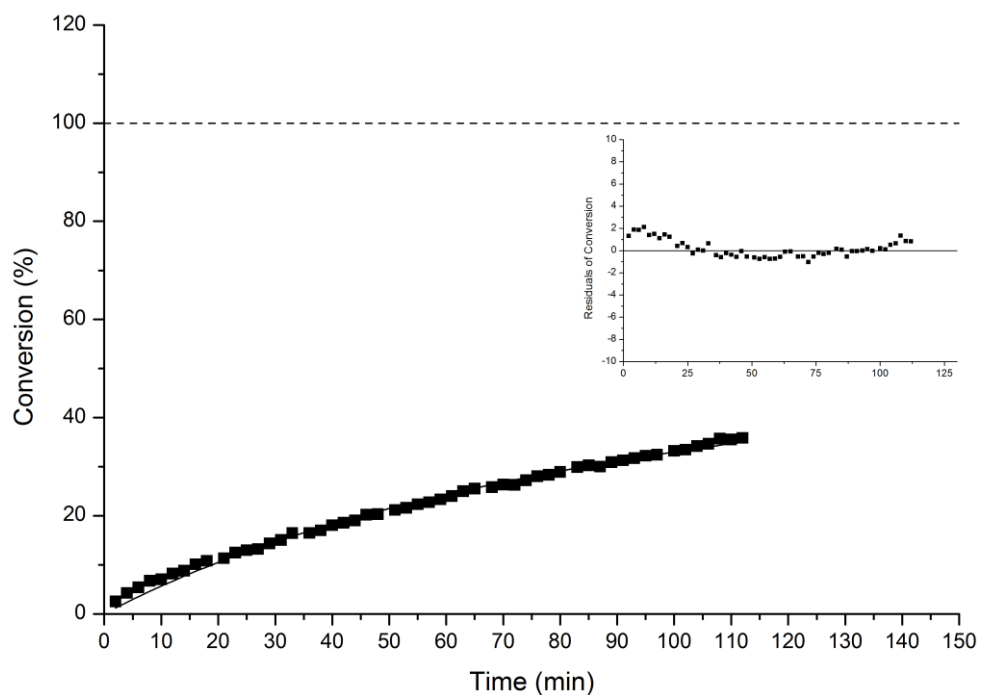

**Figure S83** Conversion vs time plot of **4a** with 1.2 equiv of Et<sub>3</sub>N (**3b**), 1.2 equiv MTBSTFA (**1e**), and 30 mol% DMAP as catalyst in DMF-d<sub>7</sub>.

$$R^2 = 0.9879$$

$$k_{\text{eff}} = 7.81 \times 10^{-3}$$

$$t_{1/2} = 98.3 \text{ min}$$

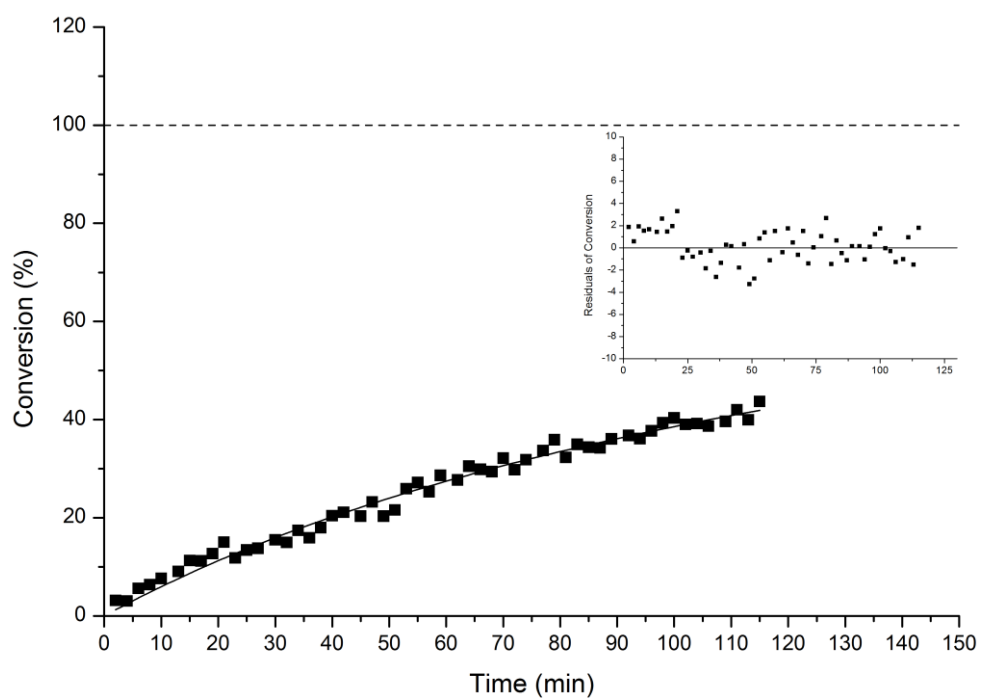

**Figure S84** Second conversion vs time plot of **4a** with 1.2 equiv of Et<sub>3</sub>N (**3**), 1.2 equiv MTBSTFA (**1e**), and 30 mol% DMAP as catalyst in DMF-d<sub>7</sub>.

$$R^2 = 0.9804$$

$$k_{\text{eff}} = 1.337 \times 10^{-2}$$

$$t_{1/2} = 57.4 \text{ min}$$

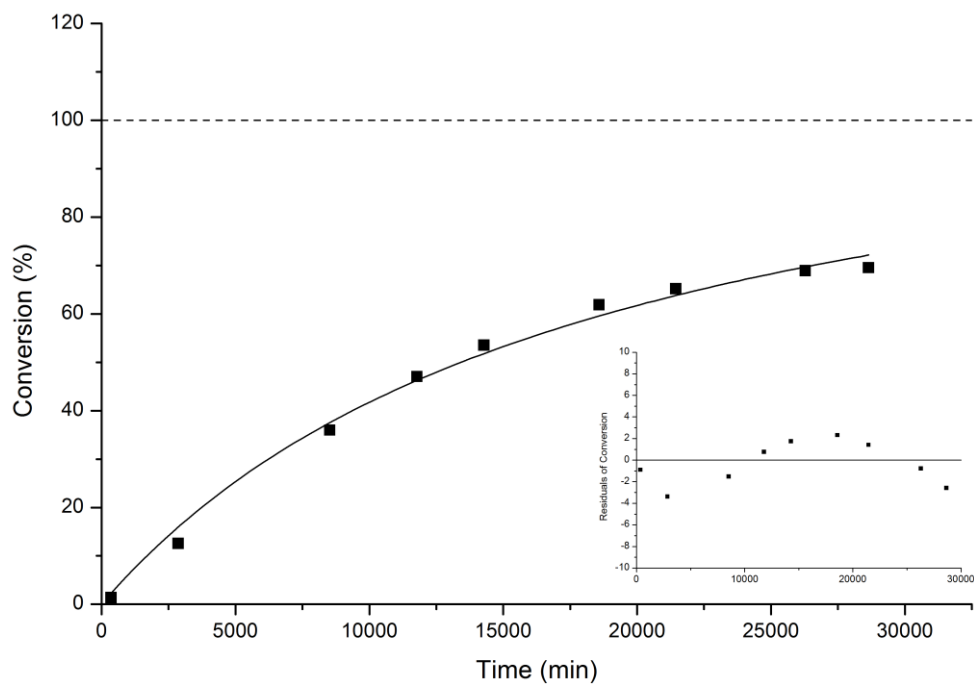

**Figure S85** Conversion vs time plot of **4b** with 1.2 equiv of Et<sub>3</sub>N (**3b**), 1.2 equiv MTBSTFA (**1e**), and 30 mol% DMAP as catalyst in CDCl<sub>3</sub>.

$$R^2 = 0.9924$$

$$k_{\text{eff}} = 4.911 \times 10^{-5}$$

$$t_{1/2} = 15637.6 \text{ min}$$

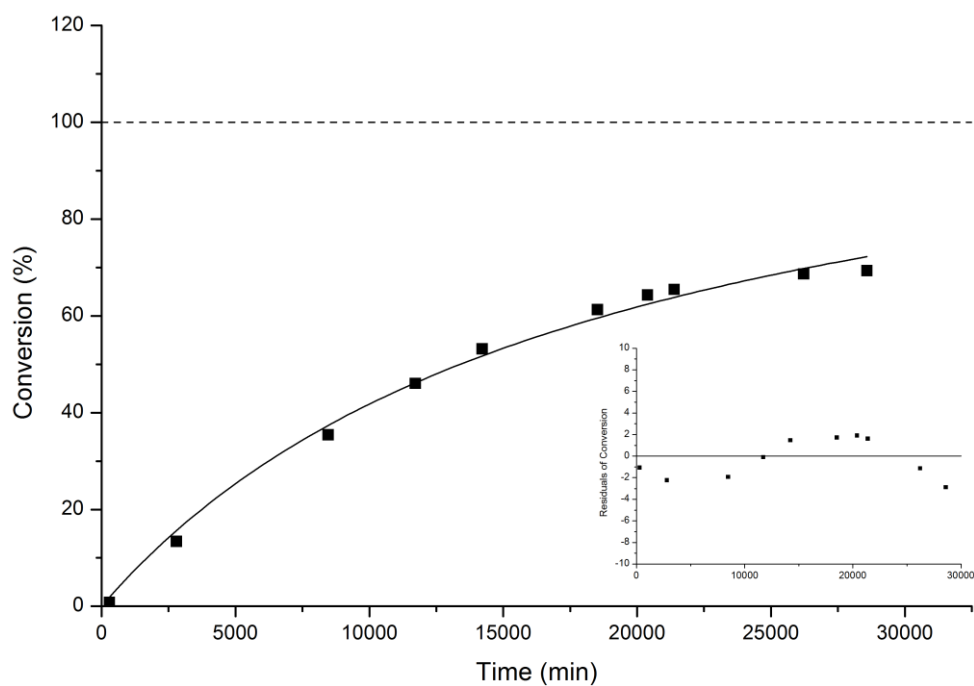

**Figure S86** Second conversion vs time plot of **4b** with 1.2 equiv of Et<sub>3</sub>N (**3b**), 1.2 equiv MTBSTFA (**1e**), and 30 mol% DMAP as catalyst in CDCl<sub>3</sub>.

$$R^2 = 0.9934$$

$$k_{\text{eff}} = 4.883 \times 10^{-5}$$

$$t_{1/2} = 15727.2 \text{ min}$$

#### 4.1.5 Measurements with TBSImi (**1d**)

As already mentioned in the manuscript almost no conversion was observed with TBSImi (**1d**). Therefore the rates were estimated by comparing with the conversion for the slowest reagent (MTBSTFA, **1e**).

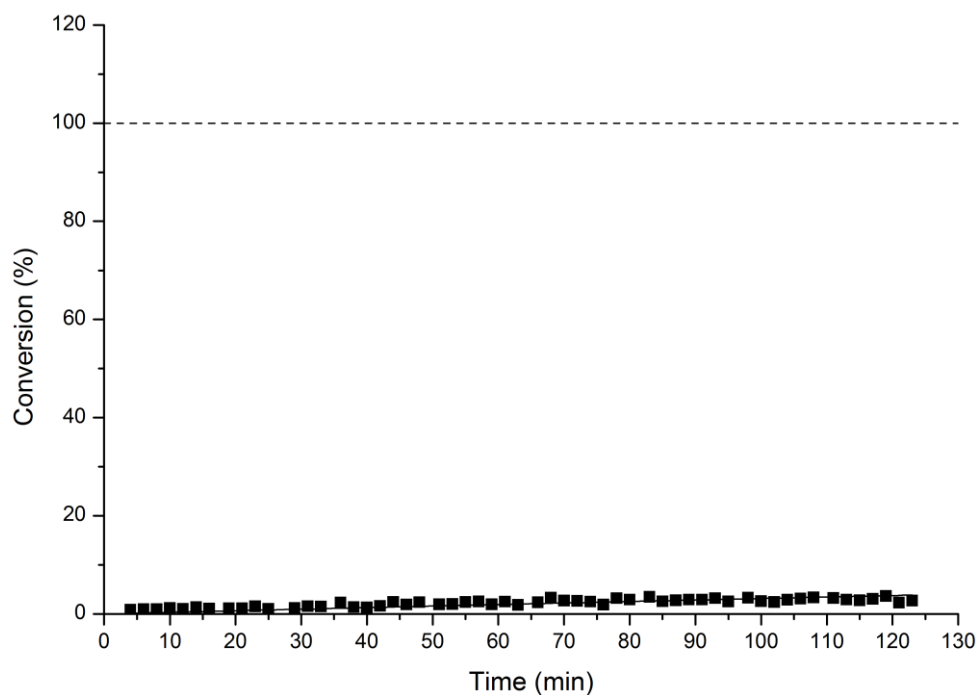

**Figure S87** Conversion vs time plot of **4b** with 1.2 equiv of Et<sub>3</sub>N (**3**), 1.2 equiv TBSImi (**1d**), and no catalyst in DMF-d<sub>7</sub>.

Correlation with **1d** leads to a rate of  $k_{\text{eff}} = 7.54 \times 10^{-4}$  and  $t_{1/2} = 1018.4$ .

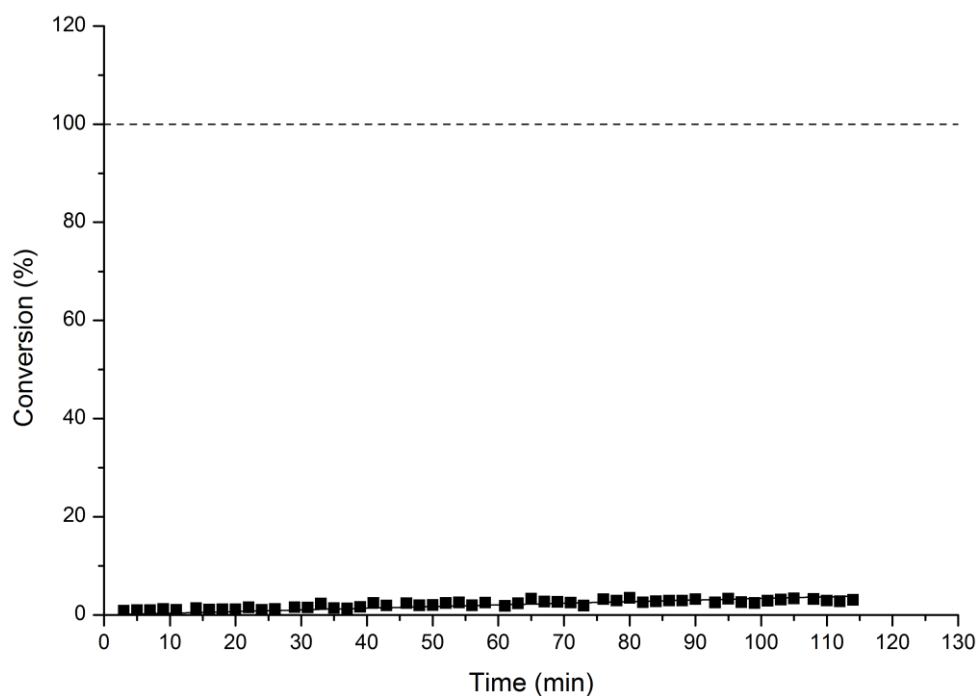

**Figure S88** Second conversion vs time plot of **4b** with 1.2 equiv of Et<sub>3</sub>N (**3**), 1.2 equiv TBSImi (**1d**), and no catalyst in DMF-d<sub>7</sub>.

Correlation with **1d** leads to a rate of  $k_{\text{eff}} = 7.79 \times 10^{-4}$  and  $t_{1/2} = 985.7$ .

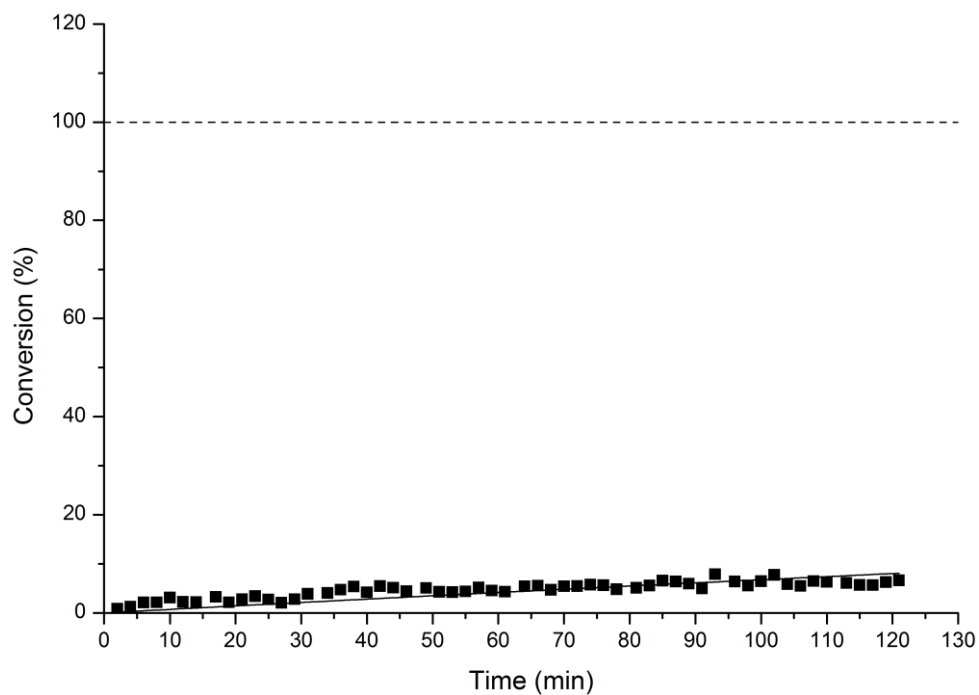

**Figure S89** Conversion vs time plot of **4b** with 1.2 equiv of Et<sub>3</sub>N (**3**), 1.2 equiv TBSImi (**1d**), and 30 mol% DMAP as catalyst in DMF-d<sub>7</sub>.

Correlation with **1d** leads to a rate of  $k_{\text{eff}} = 9.03 \times 10^{-4}$  and  $t_{1/2} = 850.4$ .

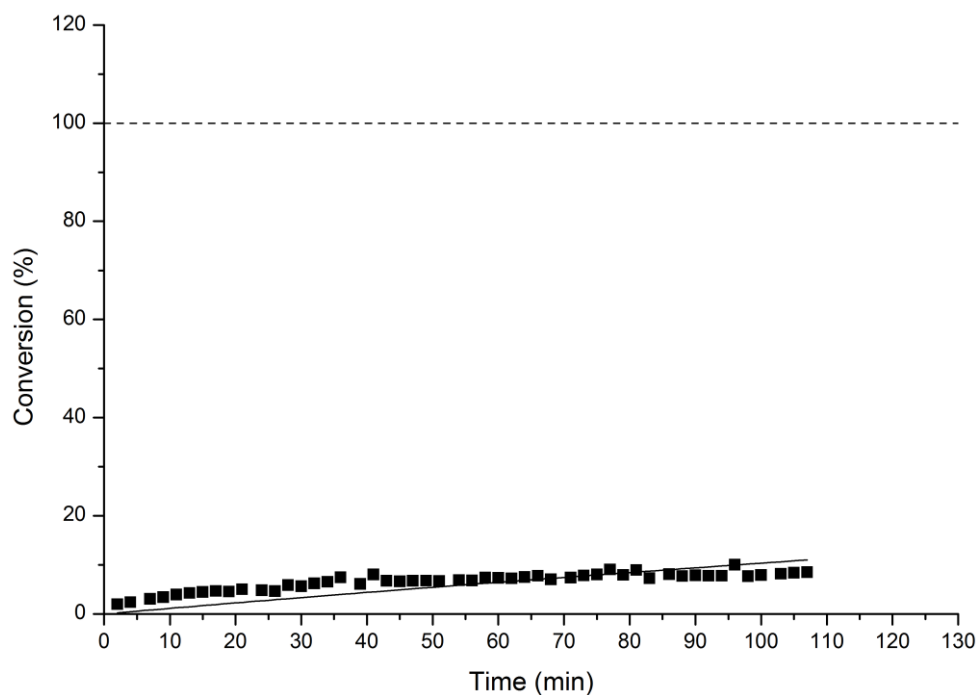

**Figure S90** Second conversion vs time plot of **4b** with 1.2 equiv of Et<sub>3</sub>N (**3**), 1.2 equiv TBSImi (**1d**), and 30 mol% DMAP as catalyst in DMF-d<sub>7</sub>.

Correlation with **1d** leads to a rate of  $k_{\text{eff}} = 1.19 \times 10^{-3}$  and  $t_{1/2} = 645.4$ .

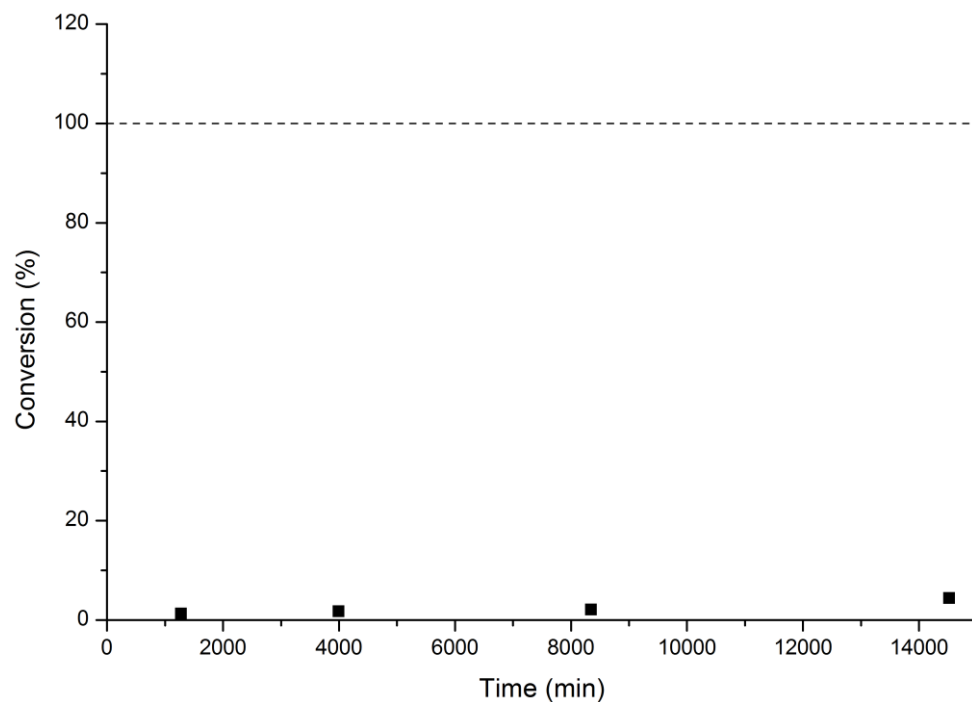

**Figure S91** Conversion vs time plot of **4b** with 1.2 equiv of Et<sub>3</sub>N (**3**), 1.2 equiv TBSImi (**1d**), and 30 mol% DMAP as catalyst in CDCl<sub>3</sub>.

Correlation with **1d** leads to a rate of  $k_{\text{eff}} = 4.1 \times 10^{-6}$  and  $t_{1/2} = 1.84 \cdot 10^6$ .



## 4.2. Possible effects of autocatalysis

In order to understand the strong deviations of the plots for the measurement in DMF-d<sub>7</sub>, an effort was made by using the tool CoPaSi to simulate the reaction rates. It became apparent that in polar solvents autocatalysis of the silyl reagent might be possible, which could explain the deviation of the fit for TBSCN, for instance. Using the reaction equations shown in Scheme S1 for the example of TBSCN in DMF (Figure S59) leads to strong improvement of the fit.

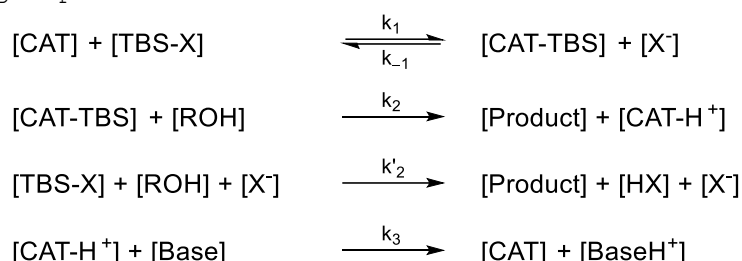

**Scheme S1.** Equations used to describe the reaction mechanism for the silylation reaction.

For all simulations  $k_3$  was chosen as a fixed value ( $k_3 = 100$ ) and the starting values were chosen randomly by the program for all remaining rates ( $k_1$ ,  $k_{-1}$ ,  $k_2$  and  $k'_2$ ). All settings and initial concentration for CoPaSi are displayed in Table S7.

**Table S7** General starting parameters for CoPaSi simulations.

| System    | Initial Value |
|-----------|---------------|
| CAT (DMF) | 12.9 M        |
| ROH       | 0.20 M        |
| TBS-X     | 0.24 M        |
| Base      | 0.24 M        |
| Volume    | 0.6 mL        |

The simulations for the obtained experimental data show a similar deviation as for the fitting function (S7). By adding the autocatalysis option with  $k'_2$  the fit can be significantly improved as shown in Figure S91. Even though we know that an additional variable will improve any fit we still think that this is an option to describe the observed experimental data better.

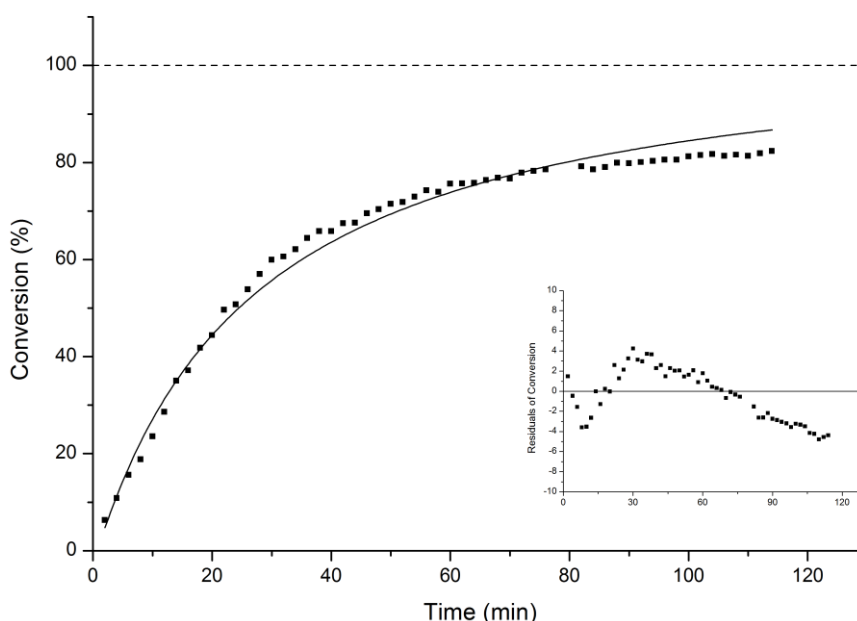

**Figure S92** Simulation of TBSCN in DMF-d<sub>7</sub> with CoPaSi.

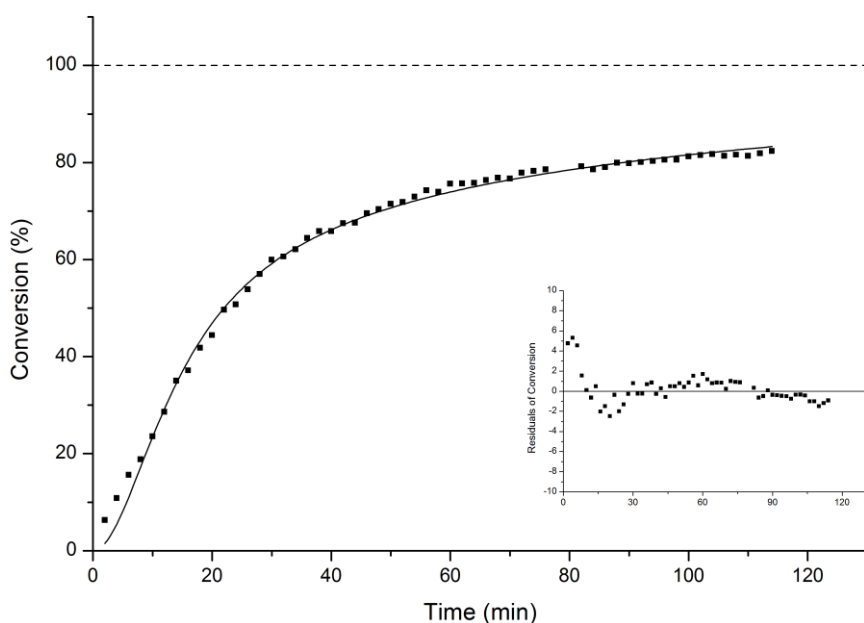

**Figure S93** Simulation of TBSCN in DMF-d7 with CoPaSi and an autocatalysis option.

Furthermore, one can obtain the amount of autocatalysis based on the experimental data in this reaction. All other reagents were evaluated under the same conditions and lead to the results in Table S8. It seems that only cyanide has a quite large amount of autocatalysis present during the reaction.

**Table S8.** Simulated k-values by CoPaSi for the reaction of alcohol **4b** with TBSCN (**1c**).

| System  | $k_1$     | $k_{-1}$  | $k_2$     | $k_2'$ |
|---------|-----------|-----------|-----------|--------|
| CN      | 9.962E-02 | 7.344E-02 | 1.649E-01 | n.d.   |
| CN-Auto | 1.811E-03 | 2.266E-01 | 2.780E-06 | 5.994  |

## 5) Computational Methods

### 5.1 Methods and data sheets

The energies have been calculated as the reaction enthalpy at 298.15 K and 1 atm pressure for the exchange reaction for the counterion shown in Figure S91. We focused on the most common TBS group as the system of choice.

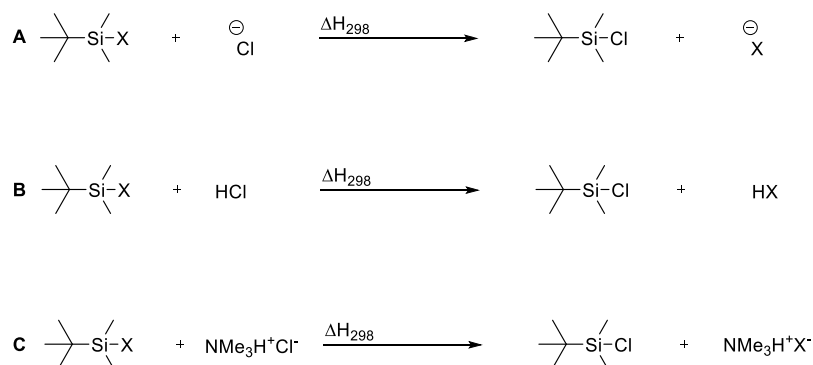

X = OTf, OClO<sub>3</sub>, MeNCOCF<sub>3</sub>, N<sub>3</sub>, CN, Imi

**Figure S94.** Counterion transfer reaction show for A) Counterion only, B) Corresponding acid, and C) auxiliary base added.

All geometry optimizations and vibrational frequency calculations have been performed using the MPW1K hybrid functional in combination with the 6-31+G(d) basis set. Thermochemical corrections to 298.15 K have been calculated for all minima from unscaled vibrational frequencies obtained at this same level. The thermochemical corrections have been combined with single point energies calculated at the MP2(FC)/G3MP2large//MPW1K/6-31+G(d) level to yield enthalpies  $H_{298}$  at 298.15 K. In conformationally flexible systems enthalpies have been calculated as Boltzmann-averaged values over all available conformers. All quantum mechanical calculations have been performed with Gaussian 09.<sup>[1]</sup>

**Table S6.** Stabilization energies for silylation reagents in various reactions relative to TBSCl (gas phase data).

| Reagent                                                                                       | A       | B      | C      | $\Delta H_{\text{Rxn}}$ |
|-----------------------------------------------------------------------------------------------|---------|--------|--------|-------------------------|
|  <b>1d</b> | +33.44  | -30.83 | -9.18  | +74.20                  |
| TBS-CN <b>1c</b>                                                                              | +28.75  | -51.73 | -21.87 | +54.35                  |
| TBS-N <sub>3</sub> <b>1f</b>                                                                  | +5.47   | -7.62  | +10.90 | +33.89                  |
| TBS-Cl <b>1a</b>                                                                              | 0.00    | 0.00   | 0.00   | 0.00                    |
|  <b>1e</b> | -6.35   | -60.61 | -26.66 | +37.86                  |
|  <b>1g</b> | -108.17 | +20.62 | -35.38 | -65.32                  |
|  <b>1b</b> | -136.26 | +29.93 | -38.98 | -54.33                  |

In Table S7 the raw data for the silyl compounds (\_sil) with various leavings groups will be shown, as well as, all counterions (\_) and protonated species (\_H). The counterion in combination with the auxiliary base will be marked aux\_f for frontside. If more than one conformer was obtained the energy was Boltzmann averaged.

**Table S9** Data for various silyl compounds with different leaving groups and their anion and protonated adducts (gas phase data).

|                 | MPW1K/6-31+G(d)  |                  | MP2 (FC) /G3MP2large//<br>MPW1K/6-31+G(d) |                  |                     |
|-----------------|------------------|------------------|-------------------------------------------|------------------|---------------------|
| System          | E <sub>tot</sub> | H <sub>298</sub> | E <sub>tot</sub>                          | H <sub>298</sub> | <H <sub>298</sub> > |
| <b>Cl</b>       |                  |                  |                                           |                  |                     |
| sil 01          | -987.420180      | -987.202751      | -985.934319                               | -985.716891      |                     |
| -               | -460.276187      | -460.273826      | -459.770535                               | -459.768174      |                     |
| H               | -460.802892      | -460.792585      | -460.302699                               | -460.292391      |                     |
| aux f           | -635.265133      | -635.118645      | -634.397798                               | -634.251311      |                     |
| <b>OTf</b>      |                  |                  |                                           |                  |                     |
| sil 01          | -1488.456837     | -1488.203145     | -1486.496515                              | -1486.242823     | <b>-1486.242562</b> |
| sil 02          | -1488.455451     | -1488.201786     | -1486.495424                              | -1486.241759     |                     |
| -               | -961.381927      | -961.346825      | -960.380846                               | -960.345744      |                     |
| H               | -961.840083      | -961.790878      | -960.855869                               | -960.806663      |                     |
| aux f           | -1136.321386     | -1136.136398     | -1134.976816                              | -1134.791828     |                     |
| <b>OC103</b>    |                  |                  |                                           |                  |                     |
| sil 01          | -1287.805800     | -1287.567884     | -1286.119487                              | -1285.881572     | <b>-1285.881346</b> |
| sil 02          | -1287.803222     | -1287.565218     | -1286.117697                              | -1285.879693     |                     |
| -               | -760.710805      | -760.689910      | -759.994724                               | -759.973830      |                     |
| H               | -761.190301      | -761.156741      | -760.482554                               | -760.448993      |                     |
| aux f           | -935.673252      | -935.503926      | -934.598569                               | -934.429243      |                     |
| <b>MeNCOCF3</b> |                  |                  |                                           |                  |                     |
| sil 01          | -1072.662903     | -1072.367468     | -1071.029448                              | -1070.734012     | <b>-1070.733885</b> |
| sil 02          | -1072.658548     | -1072.362809     | -1071.026837                              | -1070.731098     |                     |
| - 01            | -545.522667      | -545.446119      | -544.864137                               | -544.787589      | <b>-544.787589</b>  |
| - 02            | -545.505921      | -545.429693      | -544.848974                               | -544.772746      |                     |
| H 01            | -546.086672      | -545.995938      | -545.423208                               | -545.332474      |                     |
| H 02            | -546.079856      | -545.988150      | -545.416836                               | -545.325129      | <b>-545.3324712</b> |
| aux f           | -720.527281      | -720.302403      | -719.503338                               | -719.278459      |                     |
| <b>N3</b>       |                  |                  |                                           |                  |                     |
| sil 01          | -691.314247      | -691.082779      | -690.133221                               | -689.901753      | <b>-689.9018287</b> |
| sil 02          | -691.314104      | -691.082487      | -690.133512                               | -689.901894      |                     |
| -               | -164.160981      | -164.145990      | -163.966021                               | -163.951030      |                     |
| H               | -164.712883      | -164.686394      | -164.506718                               | -164.480230      |                     |
| aux f           | -339.160846      | -339.000931      | -338.592011                               | -338.432096      |                     |
| <b>Imi</b>      |                  |                  |                                           |                  |                     |
| sil 01          | -752.743078      | -752.460834      | -751.379385                               | -751.097142      | <b>-751.0971401</b> |
| sil 02          | -752.743077      | -752.460830      | -751.379386                               | -751.097138      |                     |
| -               | -225.582617      | -225.518414      | -225.199891                               | -225.135689      |                     |
| H               | -226.153471      | -226.074914      | -225.762941                               | -225.684384      |                     |
| aux f           | -400.599879      | -400.387971      | -399.846963                               | -399.635055      |                     |
| <b>CN</b>       |                  |                  |                                           |                  |                     |
| sil 01          | -619.977791      | -619.752387      | -618.857927                               | -618.632524      |                     |
| -               | -92.817228       | -92.808869       | -92.681217                                | -92.672858       |                     |
| H               | -93.384897       | -93.364434       | -93.248191                                | -93.227728       |                     |
| aux f           | -267.830402      | -267.677139      | -267.328534                               | -267.175272      |                     |
| <b>4b</b>       |                  |                  |                                           |                  | <b>-538.3516667</b> |
| 01              | -539.599653      | -539.372802      | -538.579167                               | -538.352316      |                     |
| 02              | -539.598979      | -539.372055      | -538.578495                               | -538.351571      |                     |
| 03              | -539.598168      | -539.371234      | -538.577429                               | -538.350495      |                     |
| 04              | -539.597667      | -539.370947      | -538.577029                               | -538.350309      |                     |
| 05              | -539.596649      | -539.369859      | -538.575661                               | -538.348871      |                     |
| 06              | -539.595512      | -539.368823      | -538.576732                               | -538.350044      |                     |
| 07              | -539.595179      | -539.368411      | -538.575238                               | -538.348470      |                     |
| <b>5b</b>       |                  |                  |                                           |                  | <b>-1063.779233</b> |

|                        | MPW1K/6-31+G(d)        |                        | MP2 (FC) /G3MP2large//<br>MPW1K/6-31+G(d) |                        |                                |
|------------------------|------------------------|------------------------|-------------------------------------------|------------------------|--------------------------------|
| System                 | <b>E<sub>tot</sub></b> | <b>H<sub>298</sub></b> | <b>E<sub>tot</sub></b>                    | <b>H<sub>298</sub></b> | <b>&lt;H<sub>298</sub>&gt;</b> |
| 01                     | -1066.202182           | -1065.771607           | -1064.209301                              | -1063.778726           |                                |
| 02                     | -1066.201693           | -1065.770970           | -1064.210703                              | -1063.779979           |                                |
| 03                     | -1066.201319           | -1065.770848           | -1064.208978                              | -1063.778507           |                                |
| 04                     | -1066.201216           | -1065.770565           | -1064.209273                              | -1063.778622           |                                |
| 05                     | -1066.200263           | -1065.769619           | -1064.208587                              | -1063.777943           |                                |
| 06                     | -1066.199730           | -1065.769097           | -1064.208500                              | -1063.777867           |                                |
| 07                     | -1066.197458           | -1065.766864           | -1064.205506                              | -1063.774912           |                                |
| <b>Me<sub>3</sub>N</b> |                        |                        |                                           |                        |                                |
| 01                     | -174.433383            | -174.302577            | -174.067320                               | -173.936515            |                                |

**Table S10** Counterion transfer (in kJ/mol) for various groups relative to chloride (gas phase data).

|                 | (MPW1K/6-31+G(d) )     |                        | (MP2 (FC) /G3MP2large//<br>MPW1K/6-31+G(d) ) |                        |
|-----------------|------------------------|------------------------|----------------------------------------------|------------------------|
| System          | <b>E<sub>tot</sub></b> | <b>H<sub>298</sub></b> | <b>E<sub>tot</sub></b>                       | <b>H<sub>298</sub></b> |
| OTf             | -181.38                | -190.62                | -126.33                                      | -136.26                |
| OC1O3           | -128.64                | -133.77                | -102.45                                      | -108.17                |
| MeNCOCF3        | -9.86                  | -19.89                 | +4.01                                        | -6.35                  |
| <b>Chloride</b> | <b>0.00</b>            | <b>0.00</b>            | <b>0.00</b>                                  | <b>0.00</b>            |
| N3              | +24.35                 | +20.65                 | +8.97                                        | +5.47                  |
| CN              | +43.50                 | +38.31                 | +33.94                                       | +28.75                 |
| Imi             | +43.24                 | +35.43                 | +41.25                                       | +33.44                 |

**Table S11** Counterion transfer of protonated adducts (in kJ/mol) for various groups relative to chloride (gas phase data).

|                 | (MPW1K/6-31+G(d) )     |                        | (MP2 (FC) /G3MP2large//<br>MPW1K/6-31+G(d) ) |                        |
|-----------------|------------------------|------------------------|----------------------------------------------|------------------------|
| <b>System</b>   | <b>E<sub>tot</sub></b> | <b>H<sub>298</sub></b> | <b>E<sub>tot</sub></b>                       | <b>H<sub>298</sub></b> |
| MeNCOCF3        | -107.79                | -101.44                | -66.64                                       | -60.61                 |
| CN              | -64.04                 | -58.32                 | -57.46                                       | -51.73                 |
| Imi             | -72.68                 | -63.66                 | -39.85                                       | -30.83                 |
| N3              | -41.80                 | -36.18                 | -13.44                                       | -7.62                  |
| <b>Chloride</b> | <b>0.00</b>            | <b>0.00</b>            | <b>0.00</b>                                  | <b>0.00</b>            |
| OC1O3           | -4.70                  | +2.57                  | +13.95                                       | +20.62                 |
| OTf             | -1.40                  | +5.52                  | +23.70                                       | +29.93                 |

**Table S12** Counterion transfer of protonated adducts with auxiliary base (frontside) for various groups relative to chloride (gas phase data).

|                 | (MPW1K/6-31+G(d) )     |                        | (MP2 (FC) /G3MP2large//<br>MPW1K/6-31+G(d) ) |                        |
|-----------------|------------------------|------------------------|----------------------------------------------|------------------------|
| <b>System</b>   | <b>E<sub>tot</sub></b> | <b>H<sub>298</sub></b> | <b>E<sub>tot</sub></b>                       | <b>H<sub>298</sub></b> |
| OTf             | -51.45                 | -45.58                 | -44.17                                       | -38.98                 |
| OC1O3           | -59.07                 | -52.90                 | -40.96                                       | -35.38                 |
| MeNCOCF3        | -51.00                 | -49.99                 | -27.34                                       | -26.66                 |
| CN              | -20.11                 | -23.26                 | -18.72                                       | -21.87                 |
| Imi             | -31.11                 | -29.52                 | -10.76                                       | -9.18                  |
| <b>Chloride</b> | <b>0.00</b>            | <b>0.00</b>            | <b>0.00</b>                                  | <b>0.00</b>            |
| N3              | -4.32                  | -5.93                  | +12.31                                       | +10.90                 |

**Table S13** Data for N-heterocycles and their TBS adducts. Gas phase calculation with additional SMD values in CHCl<sub>3</sub>

|                 | MP2 (FC) /G3MP2large<br>//MPW1K/6-31+G(d) | $\Delta H_{298}$ (MP2 (FC) /G3MP2large//MPW1K/6-31+G(d)) + $\Delta G_{solv}$<br>(SMD/MPW1K/6-31+G(d)) |                                           |                                       |
|-----------------|-------------------------------------------|-------------------------------------------------------------------------------------------------------|-------------------------------------------|---------------------------------------|
| System          | <b>H<sub>298</sub></b>                    | <b><math>\Delta G_{solv}</math></b>                                                                   | <b><math>\Delta H_{298}</math> (Solv)</b> | <b>&lt;H<sub>298</sub>&gt; (Solv)</b> |
| <b>Cl</b>       |                                           |                                                                                                       |                                           |                                       |
| sil_01          | -985.716891                               | -0.008920                                                                                             | -985.725811                               | -985.725811                           |
| -               | -459.768174                               | -0.086198                                                                                             | -459.854372                               |                                       |
| H               | -460.292391                               | -0.005357                                                                                             | -460.297748                               |                                       |
| aux_f           | -634.251311                               | -0.029104                                                                                             | -634.280414                               |                                       |
| <b>OTf</b>      |                                           |                                                                                                       |                                           |                                       |
| sil_01          | -1486.242823                              | -0.008960                                                                                             | -1486.251783                              | -1486.251526                          |
| sil_02          | -1486.241759                              | -0.009027                                                                                             | -1486.250786                              |                                       |
| -               | -960.345744                               | -0.061979                                                                                             | -960.407723                               |                                       |
| H               | -960.806663                               | -0.006630                                                                                             | -960.813293                               |                                       |
| aux_f           | -1134.791828                              | -0.025090                                                                                             | -1134.816918                              |                                       |
| <b>OC1O3</b>    |                                           |                                                                                                       |                                           |                                       |
| sil_01          | -1285.881572                              | -0.008845                                                                                             | -1285.890417                              | -1285.890204                          |
| sil_02          | -1285.879693                              | -0.008707                                                                                             | -1285.888400                              |                                       |
| -               | -759.973830                               | -0.067365                                                                                             | -760.041195                               |                                       |
| H               | -760.448993                               | -0.006532                                                                                             | -760.455525                               |                                       |
| aux_f           | -934.429243                               | -0.028361                                                                                             | -934.457603                               |                                       |
| <b>MeNCOCF3</b> |                                           |                                                                                                       |                                           |                                       |
| sil_01          | -1070.734012                              | -0.010640                                                                                             | -1070.744652                              | -1070.744429                          |
| sil_02          | -1070.731098                              | -0.011651                                                                                             | -1070.742749                              |                                       |
| -_01            | -544.787589                               | -0.069708                                                                                             | -544.857297                               | -544.8572966                          |
| -_02            | -544.772746                               | -0.072107                                                                                             | -544.844852                               |                                       |
| H_01            | -545.332474                               | -0.009110                                                                                             | -545.341584                               | -545.3415801                          |
| H_02            | -545.325129                               | -0.009329                                                                                             | -545.334459                               |                                       |
| aux_f           | -719.278459                               | -0.010000                                                                                             | -719.288459                               |                                       |
| <b>N3</b>       |                                           |                                                                                                       |                                           |                                       |
| sil_01          | -689.901753                               | -0.004158                                                                                             | -689.905911                               | -689.905873                           |
| sil_02          | -689.901894                               | -0.003938                                                                                             | -689.905832                               |                                       |
| -               | -163.951030                               | -0.075854                                                                                             | -164.026884                               |                                       |
| H               | -164.480230                               | -0.000498                                                                                             | -164.480728                               |                                       |
| aux_f           | -338.432096                               | -0.004678                                                                                             | -338.436774                               |                                       |
| <b>Imi</b>      |                                           |                                                                                                       |                                           |                                       |
| sil_01          | -751.097142                               | -0.018229                                                                                             | -751.115371                               | -751.1153694                          |
| sil_02          | -751.097138                               | -0.018229                                                                                             | -751.115368                               |                                       |
| anion           | -225.135689                               | -0.083254                                                                                             | -225.218943                               |                                       |
| H               | -225.684384                               | -0.016972                                                                                             | -225.701356                               |                                       |
| aux_f           | -399.635055                               | -0.020082                                                                                             | -399.655137                               |                                       |
| <b>CN</b>       |                                           |                                                                                                       |                                           |                                       |
| sil_01          | -618.632524                               | -0.008615                                                                                             | -618.641138                               |                                       |
| -               | -92.672858                                | -0.084393                                                                                             | -92.757251                                |                                       |
| H               | -93.227728                                | -0.004940                                                                                             | -93.232668                                |                                       |
| aux_f           | -267.175272                               | -0.007549                                                                                             | -267.182821                               |                                       |
| <b>4b</b>       |                                           |                                                                                                       |                                           | -538.3704566                          |
| _01             | -538.352316                               | -0.018952                                                                                             | -538.371267                               |                                       |
| _02             | -538.351571                               | -0.018269                                                                                             | -538.369840                               |                                       |
| _03             | -538.350495                               | -0.018890                                                                                             | -538.369385                               |                                       |
| _04             | -538.350309                               | -0.018851                                                                                             | -538.369160                               |                                       |
| _05             | -538.348871                               | -0.019947                                                                                             | -538.368818                               |                                       |
| _06             | -538.350044                               | -0.019521                                                                                             | -538.369565                               |                                       |
| _07             | -538.348470                               | -0.020320                                                                                             | -538.368790                               |                                       |

|                        | MP2 (FC) /G3MP2large//MPW1K/6-31+G(d) | $\Delta H_{298}$ (MP2 (FC) /G3MP2large//MPW1K/6-31+G(d)) + $\Delta G_{solv}$ (SMD/MPW1K/6-31+G(d)) |                                           |                                       |
|------------------------|---------------------------------------|----------------------------------------------------------------------------------------------------|-------------------------------------------|---------------------------------------|
| System                 | <b>H<sub>298</sub></b>                | <b><math>\Delta G_{solv}</math></b>                                                                | <b><math>\Delta H_{298}</math> (Solv)</b> | <b>&lt;H<sub>298</sub>&gt; (Solv)</b> |
| <b>5b</b>              |                                       |                                                                                                    |                                           | -1063.798615                          |
| 01                     | -1063.778726                          | -0.020040                                                                                          | -1063.798766                              |                                       |
| 02                     | -1063.779979                          | -0.019165                                                                                          | -1063.799144                              |                                       |
| 03                     | -1063.778507                          | -0.019898                                                                                          | -1063.798405                              |                                       |
| 04                     | -1063.778622                          | -0.019782                                                                                          | -1063.798404                              |                                       |
| 05                     | -1063.777943                          | -0.019520                                                                                          | -1063.797463                              |                                       |
| 06                     | -1063.777867                          | -0.019199                                                                                          | -1063.797066                              |                                       |
| 07                     | -1063.774912                          | -0.020758                                                                                          | -1063.795670                              |                                       |
| <b>Me<sub>3</sub>N</b> |                                       |                                                                                                    |                                           |                                       |
| 01                     | -173.936515                           | -0.006626                                                                                          | -173.943141                               |                                       |

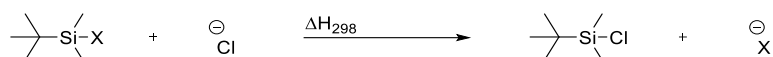

**Table S14** Counterion transfer (in kJ/mol) for various groups relative to chloride (gas and solution phase data).

|                      | MP2 (FC) /G3MP2large//MPW1K/6-31+G(d)    | $\Delta H_{298}$ (MP2 (FC) /G3MP2large//MPW1K/6-31+G(d)) + $\Delta G_{solv}$ (SMD/MPW1K/6-31+G(d)) |
|----------------------|------------------------------------------|----------------------------------------------------------------------------------------------------|
| System               | <b><math>\Delta H_{298}</math> (Gas)</b> | <b><math>\Delta H_{298}</math> (Sol)</b>                                                           |
| OTf                  | -136.26                                  | -72.56                                                                                             |
| OCIO <sub>3</sub>    | -108.17                                  | -58.89                                                                                             |
| MeNCOCF <sub>3</sub> | -6.35                                    | +41.20                                                                                             |
| <b>Chloride</b>      | <b>0.00</b>                              | <b>0.00</b>                                                                                        |
| N <sub>3</sub>       | +5.47                                    | +19.83                                                                                             |
| CN                   | +28.75                                   | +32.68                                                                                             |
| Imi                  | +33.44                                   | +65.61                                                                                             |

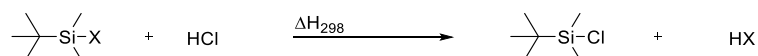

**Table S15** Counterion transfer of protonated adducts (in kJ/mol) for various groups relative to chloride (gas and solution phase data).

|                      | MP2 (FC) /G3MP2large//MPW1K/6-31+G(d)    | $\Delta H_{298}$ (MP2 (FC) /G3MP2large//MPW1K/6-31+G(d)) + $\Delta G_{solv}$ (SMD/MPW1K/6-31+G(d)) |
|----------------------|------------------------------------------|----------------------------------------------------------------------------------------------------|
| System               | <b><math>\Delta H_{298}</math> (Gas)</b> | <b><math>\Delta H_{298}</math> (Sol)</b>                                                           |
| MeNCOCF <sub>3</sub> | -60.61                                   | -66.20                                                                                             |
| CN                   | -51.73                                   | -51.44                                                                                             |
| Imi                  | -30.83                                   | -36.89                                                                                             |
| N <sub>3</sub>       | -7.62                                    | -7.66                                                                                              |
| <b>Chloride</b>      | <b>0.00</b>                              | <b>0.00</b>                                                                                        |
| OCIO <sub>3</sub>    | +20.62                                   | +17.37                                                                                             |
| OTf                  | +29.93                                   | +26.70                                                                                             |

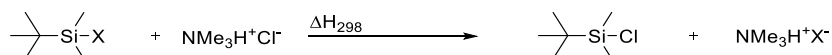

**Table S16** Counterion transfer of protonated adducts with auxiliary base (frontside) for various groups relative to chloride (gas and solution phase data).

|                      | MP2 (FC) /G3MP2large//MPW1K/6-31+G(d)    | $\Delta H_{298}$ (MP2 (FC) /G3MP2large//MPW1K/6-31+G(d)) + $\Delta G_{solv}$ (SMD/MPW1K/6-31+G(d)) |
|----------------------|------------------------------------------|----------------------------------------------------------------------------------------------------|
| System               | <b><math>\Delta H_{298}</math> (Gas)</b> | <b><math>\Delta H_{298}</math> (Sol)</b>                                                           |
| OTf                  | -38.98                                   | -28.33                                                                                             |
| OCIO <sub>3</sub>    | -35.38                                   | -33.59                                                                                             |
| MeNCOCF <sub>3</sub> | -26.66                                   | +27.76                                                                                             |
| CN                   | -21.87                                   | +33.92                                                                                             |
| Imi                  | -9.18                                    | +38.95                                                                                             |
| <b>Chloride</b>      | <b>0.00</b>                              | <b>0.00</b>                                                                                        |
| N <sub>3</sub>       | +10.90                                   | +62.23                                                                                             |

In addition we calculated the effect of the leaving group for the reaction enthalpy for alcohol **4b**. The data in Table S14 show that the reaction of TBSCl (**1a**) is slightly exothermic under these conditions. However, the addition of SMD solvation energies leads to an almost thermoneutral reaction for TBSCl (**1a**). This data shows that a reaction with any catalyst or auxiliary base is not possible for the chloride. In Table S15 trimethylamine was added as auxiliary base and changed the driving force of the reaction in the matter that for all reagents the reaction should be exothermic. For TBSCl (**1a**) this reaction yielded in  $-66.88 \text{ kJ mol}^{-1}$  for the gas phase and  $-104.02 \text{ kJ mol}^{-1}$  with SMD correction. The data is consistent for the other reagents in terms that faster reagents have a better stabilization than TBSCl (**1a**). For instance TBSOTf (**1b**) led to  $-132.35 \text{ kJ mol}^{-1}$ , while TBSCN (**1c**) was found at  $-70.10 \text{ kJ mol}^{-1}$  which in accordance to the experimental data. However, these calculation show a good number of  $-65.07 \text{ kJ mol}^{-1}$  for TBS-Imi (**1d**), which was not reacting in the experiments at all. Even though one needs to admit that the number cannot directly be correlated to the experimental data, the general trend and the order of appearance is good.

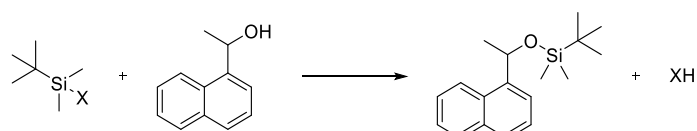

**Table S17** Reaction enthalpies for the silylation of alcohol **4b** with various silyl reagents. (gas and solution phase data).

|                      | (MPW1K/6-31+G(d)) |           | (MP2 (FC) /G3MP2large// MPW1K/6-31+G(d)) |                         | SMD                     |
|----------------------|-------------------|-----------|------------------------------------------|-------------------------|-------------------------|
| System               | $E_{\text{tot}}$  | $H_{298}$ | $E_{\text{tot}}$                         | $H_{298} \text{ (Gas)}$ | $H_{298} \text{ (Sol)}$ |
| MeNCOCF <sub>3</sub> | -69.04            | -71.61    | -62.73                                   | <b>-68.66</b>           | -66.45                  |
| CN                   | -25.29            | -28.49    | -53.55                                   | <b>-59.78</b>           | -51.69                  |
| Imi                  | -33.93            | -33.83    | -35.94                                   | <b>-38.88</b>           | -37.14                  |
| N <sub>3</sub>       | -3.05             | -6.35     | -9.53                                    | <b>-15.67</b>           | -7.91                   |
| Cl                   | +38.75            | +29.83    | +3.91                                    | <b>-8.05</b>            | -0.25                   |
| OCIO <sub>3</sub>    | +34.05            | +32.39    | +17.85                                   | <b>+12.57</b>           | +17.12                  |
| OTf                  | +37.35            | +35.34    | +27.60                                   | <b>+21.88</b>           | +26.45                  |

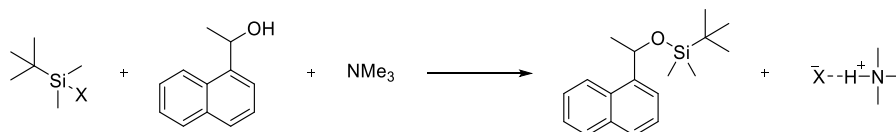

**Table S18** Reaction enthalpies for the silylation of alcohol **4b** with various silyl reagents and auxiliary base trimethylamine (gas and solution phase data).

|                      | (MPW1K/6-31+G(d)) |           | (MP2 (FC) /G3MP2large// MPW1K/6-31+G(d)) |                         | SMD                     |
|----------------------|-------------------|-----------|------------------------------------------|-------------------------|-------------------------|
| System               | $E_{\text{tot}}$  | $H_{298}$ | $E_{\text{tot}}$                         | $H_{298} \text{ (Gas)}$ | $H_{298} \text{ (Sol)}$ |
| OTf                  | -88.47            | -77.40    | -113.20                                  | <b>-105.85</b>          | -132.35                 |
| OCIO <sub>3</sub>    | -96.09            | -84.72    | -109.99                                  | <b>-102.26</b>          | -137.62                 |
| MeNCOCF <sub>3</sub> | -88.02            | -81.82    | -96.36                                   | <b>-93.54</b>           | -76.26                  |
| CN                   | -57.12            | -55.08    | -87.74                                   | <b>-88.74</b>           | -70.10                  |
| Imi                  | -68.12            | -61.34    | -79.79                                   | <b>-76.05</b>           | -65.07                  |
| Cl                   | -37.02            | -31.83    | -69.03                                   | <b>-66.88</b>           | -104.02                 |
| N <sub>3</sub>       | -41.34            | -37.75    | -56.72                                   | <b>-55.97</b>           | -41.79                  |



**Table S19** Reaction enthalpies for the silylation of alcohol **4b** with various silyl reagents (Table S18, Table S19) and  $\log(k_{eff})$  (solution phase data).

|                      | (MP2(FC)/G3MP2large//MPW1K/6-31+G(d)) + SMD |                        | $\log(k_{eff})$ |
|----------------------|---------------------------------------------|------------------------|-----------------|
| System               | No Me <sub>3</sub> N                        | With Me <sub>3</sub> N |                 |
| OTf                  | +26.45                                      | -132.35                |                 |
| OCIO <sub>3</sub>    | +17.12                                      | -137.62                | n.d.            |
| MeNCOCF <sub>3</sub> | -66.45                                      | -76.26                 |                 |
| CN                   | -51.69                                      | -70.10                 |                 |
| Imi                  | -37.14                                      | -65.07                 |                 |
| Cl                   | -0.25                                       | -104.02                |                 |
| N <sub>3</sub>       | -7.91                                       | -41.79                 | n.d.            |

The influence of the auxiliary base in form of trimethylamine is depicted in the following two figures (S95, S96), where the negative driving forces through a free proton is compensated with Me<sub>3</sub>N. This effect can be observed for silyl triflate (**1b**) very strongly.

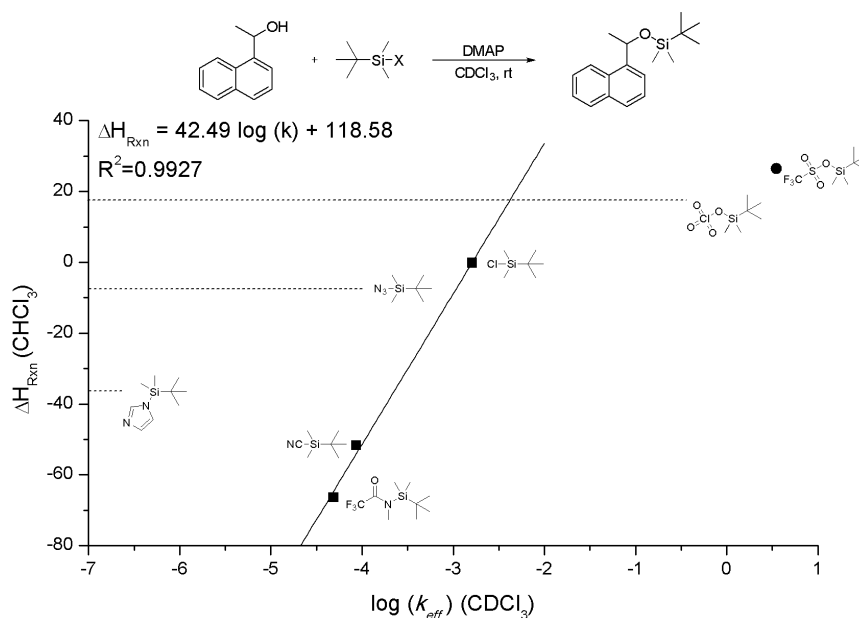

**Figure S95.** Correlation of silyl compounds with  $\Delta H_{\text{RXN}}$  ( $\text{CDCl}_3$ ) without any auxiliary base.

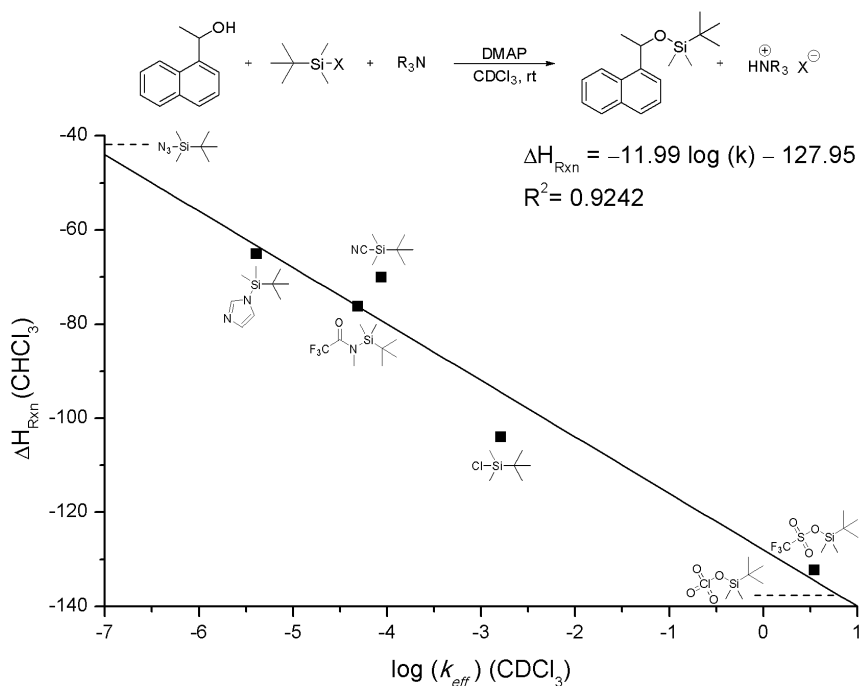

**Figure S96.** Correlation between reaction rate and  $\Delta H_{\text{RXN}}$  with an auxiliary base.

Finally, we display the obtained NPA- and Mulliken-charges for the silyl groups, which do not help to find a better correlation between calculations and experiment (Table S20).

**Table S20.** Charge of silicon and TBS-groups (Best conformer).

| TBS-X                           | Si-X   | NPA-Charges |           | Mulliken Charges |           |
|---------------------------------|--------|-------------|-----------|------------------|-----------|
|                                 |        | Si          | TBS-Group | Si               | TBS-Group |
| Cl ( <b>1a</b> )                | 2.0891 | 1.76864     | 0.41479   | 0.74936          | 0.17595   |
| CN ( <b>1c</b> )                | 1.8740 | 1.72526     | 0.47288   | 1.35259          | 0.68226   |
| MTBSTFA ( <b>1d</b> )           | 1.8099 | 2.00038     | 0.63221   | 0.89480          | 0.37368   |
| IMI ( <b>1e</b> )               | 1.7869 | 2.00954     | 0.65118   | 0.92245          | 0.43839   |
| N <sub>3</sub> ( <b>1f</b> )    | 1.7719 | 1.94482     | 0.58885   | 1.16686          | 0.41839   |
| OCIO <sub>3</sub> ( <b>1g</b> ) | 1.7621 | 2.05146     | 0.69920   | 1.15282          | 0.47807   |
| OTf ( <b>1b</b> )               | 1.7502 | 2.06406     | 0.70114   | 1.04969          | 0.44573   |

## 5.2. Structures of all Systems

(Optimized at MPW1K/6-31+G(d) level)

### Chloride (Cl)

#### \_sil\_01

```
1\1\GINC-PHOENIX\SP\RMP2-FC\GTMP2large\C6H15Cl1Si1\PASCAL\25-Jun-2014\
0\\#p MP2(FC)/GTMP2large scf=tight int=finegrid geom=check guess=read\\
Title Card Required\\0,1\Si,0,-0.6356079766,-0.1199224582,-0.00346922
14\C,0,0.0099138692,0.6802903914,1.5572887953\H,0,-0.3211036688,1.7163
487686,1.6376186982\H,0,-0.3579384483,0.1459339022,2.4329261043\H,0,1.
0981307189,0.667795426,1.5964740091\C,0,0.0385256166,0.6988376812,-1.5
742822082\C,0,-2.5025066275,-0.2050557452,0.0176599657\H,0,-2.89160355
41,-0.738946366,-0.8480626305\H,0,-2.8443032533,-0.7294591068,0.909721
6912\H,0,-2.9446685239,0.7918407027,0.0290043256\C,0,-0.4493189519,2.1
488713629,-1.6117494745\H,0,-0.0731211693,2.644472103,-2.5103085783\H,
0,-1.5375035348,2.2172435101,-1.6391751089\H,0,-0.096109756,2.72500392
47,-0.7556635397\C,0,-0.4686488142,-0.0344334584,-2.8148285795\H,0,-0.
0742636496,0.4414583712,-3.7164782342\H,0,-0.1516866928,-1.0768894383,
-2.8277066068\H,0,-1.5564783687,-0.0130757954,-2.8877083206\C,0,1.5661
469962,0.6823005819,-1.5680033317\H,0,1.9606925709,-0.3328228405,-1.53
32074461\H,0,1.9478311764,1.1535626712,-2.4775159857\H,0,1.9787041613,
1.2323375795,-0.7216064093\Cl,0,0.0440284901,-2.0951755179,0.023264465
9\\Version=AM64L-G09RevC.01\State=1-A\HF=-984.568189\MP2=-985.9343194\
RMSD=5.075e-09\PG=C01 [X(C6H15Cl1Si1)]\\@
```

#### -\_01

```
1\1\GINC-IBLIS\SP\RMP2-FC\GTMP2large\Cl1(1-)\LOCAL\26-Jun-2014\0\\#p M
P2(FC)/GTMP2large scf=tight int=finegrid geom=check guess=read\\Title
Card Required\\-1,1\Cl,-1.51076026,-1.40601502,-0.03956065\\Version=AM
64L-G09RevC.01\State=1-A1G\HF=-459.5663711\MP2=-459.7705352\RMSD=3.122
e-09\PG=OH [O(Cl1)]\\@
```

#### \_H\_01

```
1\1\GINC-EVGENIX\SP\RMP2-FC\GTMP2large\Cl1H1\ROOT\24-Jun-2014\0\\#p MP
2(FC)/GTMP2large scf=tight int=finegrid geom=check guess=read\\Title C
ard Required\\0,1\Cl,0,-0.8418776634,-0.20300752,0.\H,0,-2.1172952166,
-0.20300752,0.\\Version=AM64L-G09RevC.01\State=1-SG\HF=-460.1012637\MP
2=-460.3026985\RMSD=2.674e-09\PG=C*V [C*(H1Cl1)]\\@
```

#### \_aux\_f

```
1\1\GINC-PHOEBOS\SP\RMP2-FC\GTMP2large\C3H10Cl1N1\ROOT\21-Jun-2014\0\\#
p MP2(FC)/GTMP2large scf=tight int=finegrid\\Title Card Required\\0,1\
H,0,0.411315,0.002109,-0.001309\C,0,-1.132629,0.999086,0.986829\H,0,-0
.722022,1.961903,0.699921\H,0,-2.218527,1.055283,1.039423\H,0,-0.72560
9,0.722759,1.954189\C,0,-1.130999,-1.354579,0.372131\H,0,-2.216885,-1.
430084,0.39117\H,0,-0.72061,-2.053857,-0.349289\H,0,-0.723194,-1.58675
5,1.350742\C,0,-1.133611,0.354741,-1.358398\H,0,-0.723027,1.328997,-1.
603519\H,0,-0.726997,-0.377136,-2.048935\H,0,-2.219541,0.37622,-1.4316
11\N,0,-0.721027,-0.000233,0.000166\Cl,0,2.118571,0.000394,-0.000313\\
Version=AM64L-G09RevC.01\State=1-A\HF=-633.4461649\MP2=-634.3977981\RM
SD=2.235e-09\PG=C01 [X(C3H10Cl1N1)]\\@
```

#### \_aux\_b

```
1\1\GINC-PHOEBOS\SP\RMP2-FC\GTMP2large\C3H10Cl1N1\ROOT\21-Jun-2014\0\\#
p MP2(FC)/GTMP2large scf=tight int=finegrid\\Title Card Required\\0,1\
H,0,-2.387146,-0.000068,-0.000983\C,0,-0.915938,-0.142535,-1.407968\H,
0,-1.298712,0.695645,-1.981672\H,0,0.176683,-0.141238,-1.385534\H,0,-1
.300522,-1.077642,-1.802735\C,0,-0.917288,-1.148274,0.827221\H,0,0.175
327,-1.130783,0.814699\H,0,-1.301656,-1.022112,1.83445\H,0,-1.30141,-2
.06363,0.388208\C,0,-0.917451,1.290733,0.580464\H,0,-1.301011,2.099528
,-0.033453\H,0,-1.302264,1.369003,1.59237\H,0,0.175116,1.271155,0.5724
01\N,0,-1.373003,-0.000057,-0.00027\Cl,0,2.104746,0.000058,0.000343\\V
ersion=AM64L-G09RevC.01\State=1-A\HF=-633.4218933\MP2=-634.368122\RMSD
```

=1.892e-09\PG=C01 [X(C3H10C11N1)]\ \@

### Trifalte (OTf)

#### \_sil\_01

1\1\GINC-BORIX\SP\RMP2-FC\GTMP2large\C7H15F3O3S1Si1\ROOT\27-Jun-2014\0  
\\#p MP2(FC)/GTMP2large scf=tight int=finegrid\\Title Card Required\\0  
,1\Si,0,1.366922,0.565152,0.386091\O,0,-0.09273,0.065084,-0.440142\C,0  
,1.056276,0.411171,2.213825\H,0,1.940549,0.713223,2.776348\H,0,0.23432  
2,1.058713,2.515517\H,0,0.807151,-0.608181,2.504454\C,0,1.697118,2.323  
317,-0.12603\H,0,2.646528,2.672298,0.281823\H,0,1.738783,2.429992,-1.2  
09188\H,0,0.914645,2.98268,0.247664\C,0,2.613611,-0.678691,-0.285414\C  
,0,2.755304,-0.514941,-1.79846\H,0,3.120053,0.475937,-2.069875\H,0,3.4  
74044,-1.241692,-2.185107\H,0,1.810853,-0.679463,-2.316231\C,0,3.96514  
7,-0.417287,0.383335\H,0,3.920406,-0.543209,1.465894\H,0,4.708093,-1.1  
24623,0.007191\H,0,4.342563,0.584764,0.174734\C,0,2.160267,-2.10383,0.  
030251\H,0,1.199587,-2.335268,-0.428448\H,0,2.890005,-2.819335,-0.3568  
16\H,0,2.073739,-2.279883,1.102841\S,0,-1.506965,0.697469,-0.445799\O,  
0,-1.944325,0.921688,-1.789406\O,0,-1.608357,1.723059,0.55668\C,0,-2.4  
51845,-0.75129,0.179689\F,0,-2.007971,-1.096584,1.374293\F,0,-3.72396,  
-0.424349,0.267862\F,0,-2.319043,-1.773171,-0.640324\\Version=AM64L-G0  
9RevC.01\State=1-A\HF=-1483.5356709\MP2=-1486.4965148\RMSD=7.342e-09\PG  
=C01 [X(C7H15F3O3S1Si1)]\ \@

#### \_sil\_02

1\1\GINC-BORIX\SP\RMP2-FC\GTMP2large\C7H15F3O3S1Si1\ROOT\27-Jun-2014\0  
\\#p MP2(FC)/GTMP2large scf=tight int=finegrid\\Title Card Required\\0  
,1\Si,0,-1.323524,0.814512,0.07137\O,0,0.171296,0.120579,-0.507587\C,0  
, -1.074475,1.395226,1.820606\H,0,-1.950034,1.954802,2.152838\H,0,-0.90  
6797,0.574299,2.513513\H,0,-0.215565,2.06267,1.885702\C,0,-2.648412,-0  
.513146,-0.122833\S,0,1.249214,-0.803525,0.106857\O,0,1.447338,-1.9488  
27,-0.728607\O,0,1.072073,-0.937177,1.525628\C,0,2.703502,0.293544,-0.  
144588\F,0,2.516411,1.43889,0.486899\F,0,3.773831,-0.298867,0.341658\F  
,0,2.881481,0.533885,-1.426635\C,0,-1.517753,2.242516,-1.106982\H,0,-2  
.45225,2.775638,-0.930306\H,0,-0.70299,2.95432,-0.975525\H,0,-1.508004  
,1.914614,-2.145168\C,0,-2.749936,-0.942042,-1.586555\H,0,-3.518168,-1  
.711482,-1.695118\H,0,-3.027823,-0.113766,-2.238659\H,0,-1.813537,-1.3  
61393,-1.953842\C,0,-3.984605,0.085701,0.325879\H,0,-4.267122,0.9597,-  
0.26295\H,0,-4.780042,-0.653338,0.204185\H,0,-3.974042,0.375167,1.3774  
51\C,0,-2.332225,-1.734567,0.739637\H,0,-1.419264,-2.23784,0.423747\H,  
0,-2.226739,-1.483274,1.794738\H,0,-3.143461,-2.462048,0.65675\\Versio  
n=AM64L-G09RevC.01\State=1-A\HF=-1483.5344697\MP2=-1486.495424\RMSD=1.  
801e-09\PG=C01 [X(C7H15F3O3S1Si1)]\ \@

#### -\_01

1\1\GINC-STEAK\SP\RMP2-FC\GTMP2large\C1F3O3S1(1-)\ROOT\26-Jun-2014\0\\  
#p MP2(FC)/GTMP2large scf=tight int=finegrid geom=check guess=read\\Ti  
tle Card Required\\-1,1\O,0,2.0160338004,0.7415411506,0.6374862742\S,0  
,1.6168286449,-0.575347112,0.1593462258\O,0,2.2793246477,-1.0040554643  
, -1.0647588599\O,0,-0.2586596442,-0.1637666477,-0.7227408683\C,0,-1.25  
95820229,0.1515703534,-0.0225118894\F,0,-1.5013399025,1.4941177894,0.0  
849759742\F,0,-2.4437276443,-0.3520788623,-0.4967210814\F,0,-1.2194723  
291,-0.277128447,1.2814681648\\Version=AM64L-G09RevC.01\State=1-A\HF=-  
958.5704982\MP2=-960.3808465\RMSD=5.268e-09\PG=C01 [X(C1F3O3S1)]\ \@

#### \_H\_01

1\1\GINC-BORIX\SP\RMP2-FC\GTMP2large\C1H1F3O3S1\ROOT\22-Jun-2014\0\\#p  
MP2(FC)/GTMP2large scf=tight int=finegrid geom=check guess=read\\Titl  
e Card Required\\0,1\S,0,-1.4378532967,-2.3927193446,0.9542060886\O,0,  
-1.4598515509,-3.6152972185,0.2234477867\O,0,-2.0156303576,-1.16820322  
73,0.4854921145\C,0,-2.1671732947,-2.728114821,2.6115092205\F,0,-1.963  
963654,-1.6817226642,3.3907413244\F,0,-3.4585208124,-2.9292732616,2.47

48024308\F,0,-1.6068051656,-3.7870161556,3.1486563553\O,0,0.0653614243  
, -2.1204806875,1.3930632619\H,0,0.2045745776,-1.1722593497,1.516919237  
4\\Version=AM64L-G09RevC.01\State=1-A\HF=-959.0596646\MP2=-960.8558686  
\RMSD=4.218e-09\PG=C01 [X(C1H1F3O3S1)]\\@

\_aux\_f

1\1\GINC-IBLIS\SP\RMP2-FC\GTMP2large\C4H10F3N1O3S1\LOCAL\26-Jun-2014\0  
\#p MP2(FC)/GTMP2large scf=tight int=finegrid\\Title Card Required\\0  
,1\H,0,1.526302,-0.055863,0.475578\C,0,2.267584,1.277467,-0.90228\H,0,  
1.856373,2.132548,-0.375873\H,0,3.218869,1.541541,-1.357544\H,0,1.5573  
52,0.940307,-1.648803\C,0,2.96406,-1.037297,-0.608805\H,0,3.934682,-0.  
838143,-1.0561\H,0,3.048929,-1.830175,0.127329\H,0,2.23805,-1.322717,-  
1.362174\C,0,3.341576,0.584038,1.177073\H,0,2.904895,1.447332,1.668313  
\H,0,3.40781,-0.234631,1.885983\H,0,4.330973,0.831744,0.801392\N,0,2.4  
75753,0.181294,0.060145\O,0,0.15353,-0.43127,1.133686\S,0,-0.781726,-0  
.825218,0.046101\O,0,-1.600698,-1.974955,0.32947\O,0,-0.116803,-0.7627  
67,-1.254332\C,0,-1.941527,0.59884,0.01043\F,0,-2.833287,0.453952,-0.9  
53232\F,0,-2.577994,0.722329,1.161538\F,0,-1.269306,1.727735,-0.213399  
\Version=AM64L-G09RevC.01\State=1-A\HF=-1132.43056\MP2=-1134.9768164\  
RMSD=9.703e-09\PG=C01 [X(C4H10F3N1O3S1)]\\@

\_aux\_b

1\1\GINC-SOLARIS\SP\RMP2-FC\GTMP2large\C4H10F3N1O3S1\PASCAL\26-Jun-201  
4\0\\#p MP2(FC)/GTMP2large scf=tight int=finegrid\\Title Card Required  
\0,1\H,0,4.129068,-0.639361,-0.144588\C,0,2.439685,-1.426348,0.677667  
\H,0,2.931587,-1.588539,1.631682\H,0,1.418108,-1.087757,0.832572\H,0,2  
.470295,-2.331523,0.080284\C,0,2.617611,-0.159265,-1.419522\H,0,1.5799  
2,0.172895,-1.353634\H,0,3.218638,0.590066,-1.925007\H,0,2.680776,-1.1  
05035,-1.948249\C,0,3.143761,0.918444,0.723801\H,0,3.642352,0.751236,1  
.673411\H,0,3.666143,1.679925,0.154199\H,0,2.102916,1.188872,0.886909\  
N,0,3.160967,-0.350218,-0.049455\O,0,0.134086,0.533431,1.049062\S,0,-0  
.861246,0.867309,0.014178\O,0,-1.76357,1.9471,0.33633\O,0,-0.279442,0.  
873117,-1.32942\C,0,-1.913724,-0.640435,0.000832\F,0,-2.84821,-0.56919  
1,-0.931363\F,0,-1.164371,-1.71848,-0.252447\F,0,-2.502887,-0.827857,1  
.171291\\Version=AM64L-G09RevC.01\State=1-A\HF=-1132.4087999\MP2=-1134  
.9510373\RMSD=8.549e-09\PG=C01 [X(C4H10F3N1O3S1)]\\@

**Perchlorate (OC1O3)**

\_sil\_01

1\1\GINC-STEAK\SP\RMP2-FC\GTMP2large\C6H15Cl1O4Si1\ROOT\21-Jun-2014\0\  
\#p MP2(FC)/GTMP2large scf=tight int=finegrid\\Title Card Required\\0,  
1\C,0,-2.165183,-0.511479,-0.033192\C,0,-2.048909,-1.586758,1.046068\H  
,0,-2.914252,-2.252535,1.000218\H,0,-1.156661,-2.19785,0.915857\H,0,-2  
.022053,-1.160889,2.049244\C,0,-2.261812,-1.17655,-1.406159\H,0,-3.134  
997,-1.832833,-1.437971\H,0,-2.376804,-0.447167,-2.208289\H,0,-1.38496  
6,-1.784118,-1.626358\C,0,-3.42385,0.324458,0.213862\H,0,-4.305743,-0.  
319839,0.18428\H,0,-3.414385,0.809249,1.191112\H,0,-3.564065,1.095287,  
-0.544993\C,0,-0.330525,1.347225,1.72091\H,0,0.565061,1.966879,1.71295  
6\H,0,-1.163148,1.979034,2.033284\H,0,-0.193208,0.571953,2.472008\C,0,  
-0.658447,1.94182,-1.294804\H,0,-1.473875,2.651164,-1.149481\H,0,0.276  
473,2.499259,-1.270919\H,0,-0.76352,1.50722,-2.287765\Si,0,-0.673757,0  
.640672,0.034495\O,0,0.606814,-0.505511,-0.354627\Cl,0,2.152681,-0.275  
966,-0.045235\O,0,2.409699,1.110125,-0.340987\O,0,2.81087,-1.187068,-0  
.927267\O,0,2.322055,-0.591931,1.344479\\Version=AM64L-G09RevC.01\Stat  
e=1-A\HF=-1283.7620504\MP2=-1286.1194875\RMSD=6.950e-09\PG=C01 [X(C6H1  
5Cl1O4Si1)]\\@

\_sil\_02

1\1\GINC-ANGIE\SP\RMP2-FC\GTMP2large\C6H15Cl1O4Si1\PASCAL\21-Jun-2014\  
0\\#p MP2(FC)/GTMP2large scf=tight int=finegrid\\Title Card Required\\  
0,1\C,0,1.749084,-0.781102,0.015227\C,0,1.40934,2.026247,-1.330643\H,0

,2.418549,2.372047,-1.10602\H,0,1.419576,1.565971,-2.317011\H,0,0.761751,2.900949,-1.378905\Si,0,0.803644,0.851682,-0.018521\O,0,-0.81698,0.611348,-0.671434\C1,0,-2.026361,-0.206701,-0.038983\O,0,-1.905425,-1.538356,-0.561114\O,0,-3.183785,0.488051,-0.507546\O,0,-1.848583,-0.143751,1.387926\C,0,0.660518,1.688323,1.637006\H,0,0.004799,2.555916,1.568496\H,0,0.264643,1.032221,2.407881\H,0,1.641558,2.041956,1.957106\C,0,3.213978,-0.429715,0.302327\H,0,3.808683,-1.345419,0.337906\H,0,3.648874,0.205544,-0.47007\H,0,3.340383,0.070061,1.264063\C,0,1.656073,-1.481229,-1.3405\H,0,2.041973,-0.862069,-2.150754\H,0,2.251179,-2.39758,-1.323474\H,0,0.632659,-1.76024,-1.585983\C,0,1.246386,-1.721815,1.110417\H,0,1.29374,-1.266285,2.099378\H,0,0.222658,-2.047763,0.938792\H,0,1.87202,-2.617544,1.134942\\Version=AM64L-G09RevC.01\State=1-A\HF=-1283.7592625\MP2=-1286.1176966\RMSD=7.310e-09\PG=C01 [X(C6H15C11O4Si1)]\\@

#### -\_01

1\1\GINC-IBLIS\SP\RMP2-FC\GTMP2large\C11O4(1-)\LOCAL\26-Jun-2014\0\\#p MP2(FC)/GTMP2large scf=tight int=finegrid geom=check guess=read\\Title Card Required\\-1,1\O,0,0.0874214694,1.1962381348,-0.372831854\C1,0,0.0973292627,2.4876501082,0.323994492\O,0,-0.2895610668,2.2902891354,1.7255268298\O,0,-0.8535902271,3.3994373827,-0.3220120595\O,0,1.4450484458,3.0648404648,0.2654054965\\Version=AM64L-G09RevC.01\HF=-758.8056985\MP2=-759.9947243\RMSD=6.209e-09\PG=C03V [C3(C11O1),3SGV(O1)]\\@

#### \_H\_01

1\1\GINC-LIEBIG\SP\RMP2-FC\GTMP2large\C11H1O4\PASCAL\19-Jun-2014\0\\#p MP2(FC)/GTMP2large scf=tight int=finegrid geom=check guess=read\\Title Card Required\\0,1\C1,0,0.1046197867,2.5762029366,0.3796302197\O,0,-0.2732171309,2.2532844207,1.7229033237\O,0,-0.849367143,3.3389998594,-0.3490546187\O,0,1.4592656336,3.0268866142,0.2645711556\O,0,0.0601233243,1.1506170754,-0.4294623376\H,0,0.6937247634,0.5635212855,0.0118122882\\Version=AM64L-G09RevC.01\State=1-A\HF=-759.2888662\MP2=-760.4825536\RMSD=6.511e-09\PG=CS [SG(C11H1O2),X(O2)]\\@

#### \_aux\_f

1\1\GINC-ANGIE\SP\RMP2-FC\GTMP2large\C3H10C11N1O4\PASCAL\11-Jul-2014\0\\#p MP2(FC)/GTMP2large scf=tight int=finegrid\\Title Card Required\\0,1\C,0,2.044524,1.255316,0.701895\H,0,1.300686,1.29239,1.489228\H,0,3.050765,1.284565,1.112022\H,0,1.892171,2.091388,0.027256\C,0,1.983666,-1.179631,0.825257\H,0,2.988262,-1.217861,1.238564\H,0,1.240935,-1.099114,1.610476\H,0,1.787276,-2.070706,0.238047\O,0,-0.552906,-0.010642,-1.138734\C1,0,-1.578063,0.000419,-0.038358\O,0,-0.812662,0.142398,1.212972\O,0,-2.292026,-1.256984,-0.054513\O,0,-2.458404,1.129353,-0.23002\C,0,2.754463,-0.08061,-1.213523\H,0,3.788566,-0.088605,-0.879556\H,0,2.534548,-0.989292,-1.763992\H,0,2.577699,0.776784,-1.854415\N,0,1.860726,0.00073,-0.048502\H,0,0.873136,0.004756,-0.425442\\Version=AM64L-G09RevC.01\State=1-A\HF=-932.664148\MP2=-934.5985687\RMSD=3.808e-09\PG=C01 [X(C3H10C11N1O4)]\\@

#### \_aux\_b

1\1\GINC-IBLIS\SP\RMP2-FC\GTMP2large\C3H10C11N1O4\LOCAL\11-Jul-2014\0\\#p MP2(FC)/GTMP2large scf=tight int=finegrid\\Title Card Required\\0,1\C,0,-1.976089,-0.645184,-1.265284\H,0,-2.288653,-1.68393,-1.249839\H,0,-2.44176,-0.12238,-2.094646\H,0,-0.895045,-0.570415,-1.33667\C,0,-1.976305,-0.773394,1.191401\H,0,-2.447175,-1.750633,1.155621\H,0,-0.895844,-0.878513,1.158872\H,0,-2.283336,-0.238236,2.083689\O,0,0.981855,0.83166,1.096723\C1,0,1.508046,-0.000101,0.000003\O,0,0.976352,-1.363836,0.171494\O,0,2.951946,-0.003509,-0.001014\O,0,0.979478,0.534931,-1.267186\C,0,-1.973719,1.41881,0.073846\H,0,-2.440953,1.876528,0.939989\H,0,-0.892923,1.441848,0.177038\H,0,-2.283399,1.924587,-0.834503\H,0,-3.428944,0.002148,0.000073\N,0,-2.414158,0.000765,0.000056\\Version=AM64L-G09RevC.01\State=1-A\HF=-932.6467063\MP2=-934.5781965\RMSD=3.467e-09\PG=C01 [X(C3H10C11N1O4)]\\@

MeNCOCF3

### \_sil\_01

```
1\1\GINC-Q1\SP\RMP2-FC\GTMP2large\C9H18F3N1O1Si1\ROOT\21-Nov-2014\0\#\#
p MP2(FC)/GTMP2large scf=tight int=finegrid\\Title Card Required\\0,1\
N,0,-0.440511,0.603486,-0.146653\C,0,-0.841444,1.65309,-1.075396\H,0,0
.009944,1.922836,-1.691359\H,0,-1.625483,1.318514,-1.744756\H,0,-1.183
089,2.544557,-0.552279\C,0,2.285754,-0.70605,-0.484151\C,0,2.241315,-0
.382485,-1.977227\H,0,2.840487,-1.106832,-2.535363\H,0,1.226306,-0.431
751,-2.373408\H,0,2.646087,0.605683,-2.199631\C,0,1.780112,-2.131811,-
0.271637\H,0,2.429664,-2.834326,-0.801497\H,0,1.774258,-2.415085,0.779
832\H,0,0.767971,-2.268273,-0.647128\C,0,1.912333,2.296369,0.192984\H,
0,1.238975,3.045841,0.610225\H,0,2.866737,2.405629,0.709232\H,0,2.0817
05,2.545544,-0.853396\C,0,1.263437,0.26407,2.332318\H,0,1.050942,-0.76
9302,2.590452\H,0,2.236007,0.53734,2.744484\H,0,0.514424,0.886457,2.82
2639\C,0,-1.295291,-0.319492,0.328132\Si,0,1.258387,0.559598,0.488008\
O,0,-0.977957,-1.231326,1.058662\C,0,-2.785918,-0.22678,-0.071041\F,0,
-3.502941,-1.087398,0.6173\F,0,-3.284501,0.991552,0.154054\F,0,-2.9558
4,-0.500702,-1.369037\C,0,3.733343,-0.615735,0.00516\H,0,4.356304,-1.3
27323,-0.54306\H,0,4.163681,0.37454,-0.149874\H,0,3.822602,-0.860334,1
.064351\\Version=AM64L-G09RevC.01\State=1-A\HF=-1068.1988012\MP2=-1071
.0294477\RMSD=3.066e-09\PG=C01 [X(C9H18F3N1O1Si1)]\\@
```

### \_sil\_02

```
1\1\GINC-TOFU\SP\RMP2-FC\GTMP2large\C9H18F3N1O1Si1\ROOT\21-Jun-2014\0\
\#p MP2(FC)/GTMP2large scf=tight int=finegrid\\Title Card Required\\0,
1\N,0,0.414653,1.072328,0.026584\C,0,0.084174,2.466279,0.335412\H,0,-0
.98201,2.625633,0.233469\H,0,0.381662,2.704172,1.353124\H,0,0.611734,3
.143429,-0.333545\C,0,-2.131861,-0.455286,0.672631\C,0,-2.572845,0.704
615,1.564758\H,0,-3.29184,0.347598,2.306848\H,0,-1.737535,1.141644,2.1
11195\H,0,-3.065041,1.498801,1.001757\C,0,-1.488224,-1.527017,1.549891
\H,0,-2.20552,-1.870781,2.299966\H,0,-1.176503,-2.399243,0.976017\H,0,
-0.616121,-1.149855,2.081934\C,0,-1.813204,1.334951,-1.850222\H,0,-1.0
86487,1.898507,-2.436237\H,0,-2.426636,0.772469,-2.554928\H,0,-2.46742
7,2.051151,-1.356067\C,0,-0.400226,-1.289879,-1.786985\H,0,0.048908,-2
.130459,-1.26888\H,0,-1.292119,-1.653657,-2.300214\H,0,0.294148,-0.953
544,-2.555027\C,0,1.718259,0.829673,0.289566\Si,0,-0.948055,0.126687,-
0.697652\O,0,2.496181,1.663896,0.6922\C,0,2.286233,-0.582827,0.069465\
F,0,3.439859,-0.714454,0.689539\F,0,1.472563,-1.53506,0.532681\F,0,2.4
9235,-0.816245,-1.227616\C,0,-3.370831,-1.048239,-0.005474\H,0,-4.0811
54,-1.386251,0.753404\H,0,-3.889519,-0.319949,-0.63003\H,0,-3.129585,-
1.912532,-0.625039\\Version=AM64L-G09RevC.01\State=1-A\HF=-1068.193599
2\MP2=-1071.0268371\RMSD=2.069e-09\PG=C01 [X(C9H18F3N1O1Si1)]\\@
```

### -\_01

```
1\1\GINC-Q1\SP\RMP2-FC\GTMP2large\C3H3F3N1O1(1-)\ROOT\21-Nov-2014\0\#\#
p MP2(FC)/GTMP2large scf=tight int=finegrid\\Title Card Required\\-1,1
\N,0,-1.361959,-0.722481,0.000104\C,0,-2.741718,-0.325716,-0.000075\H,
0,-3.376901,-1.214629,-0.000458\H,0,-3.005734,0.281764,0.875239\H,0,-3
.005407,0.282361,-0.875073\C,0,-0.551169,0.28826,0.000078\O,0,-0.75212
5,1.520925,0.000045\C,0,0.933952,-0.104778,0.000059\F,0,1.575173,0.396
532,-1.07415\F,0,1.57532,0.396738,1.073906\F,0,1.193102,-1.416172,0.00
0115\\Version=AM64L-G09RevC.01\State=1-A\HF=-543.1971966\MP2=-544.8641
372\RMSD=7.057e-09\PG=C01 [X(C3H3F3N1O1)]\\@
```

### -\_02

```
1\1\GINC-Q1\SP\RMP2-FC\GTMP2large\C3H3F3N1O1(1-)\ROOT\21-Nov-2014\0\#\#
p MP2(FC)/GTMP2large scf=tight int=finegrid\\Title Card Required\\-1,1
\N,0,-1.619031,0.669351,0.007464\C,0,-2.139515,-0.665319,-0.003796\H,0
,-3.141263,-0.649616,0.435538\H,0,-2.259217,-1.063468,-1.02088\H,0,-1.
568652,-1.413341,0.560091\C,0,-0.348217,0.926376,-0.006596\O,0,0.21139
8,2.036265,-0.009232\C,0,0.676017,-0.257704,-0.002123\F,0,1.937536,0.1
34042,-0.179221\F,0,0.669747,-0.946243,1.161987\F,0,0.446212,-1.173274
,-0.969217\\Version=AM64L-G09RevC.01\State=1-A\HF=-543.1791177\MP2=-54
4.8489738\RMSD=6.641e-09\PG=C01 [X(C3H3F3N1O1)]\\@
```

### H\_01

```
1\1\GINC-Q1\SP\RMP2-FC\GTMP2large\C3H4F3N1O1\ROOT\21-Nov-2014\0\#\p MP
2(FC)/GTMP2large scf=tight int=finegrid geom=check guess=read\\Title C
ard Required\\0,1\C,0,-2.1189079766,-0.7353318049,0.1238053513\H,0,-2.
9522340662,-0.7566775402,0.8188722976\H,0,-2.4521914144,-1.0922884431,
-0.8496611934\H,0,-1.3342826,-1.3941454484,0.4819506433\C,0,-0.3462058
426,0.8473588942,-0.3356293478\O,0,0.4797320108,0.0153972639,-0.619123
3524\C,0,0.0471853998,2.3330296747,-0.3761198486\F,0,0.9779813436,2.58
6925664,0.5307691844\F,0,0.5226941492,2.6529557992,-1.5673564113\F,0,-
0.9932000605,3.1402325152,-0.1241359248\N,0,-1.6060895617,0.6094114474
,0.0430863979\H,0,-2.2192687815,1.385096518,0.2076779039\\Version=AM64
L-G09RevC.01\State=1-A\HF=-543.7715037\MP2=-545.4232078\RMSD=9.069e-09
\PG=C01 [X(C3H4F3N1O1)]\\@
```

### H\_02

```
1\1\GINC-ANGIE\SP\RMP2-FC\GTMP2large\C3H4F3N1O1\PASCAL\18-Jun-2014\0\#\
#p MP2(FC)/GTMP2large scf=tight int=finegrid geom=check guess=read\\Ti
tle Card Required\\0,1\C,0,0.2335211141,-0.8918672972,-2.1844722588\H,
0,-0.280638806,-1.125664727,-3.1117061711\H,0,1.3025762102,-0.82772575
74,-2.3803067098\H,0,0.0493335946,-1.7045718313,-1.4912849534\C,0,-0.3
049743134,0.8325931703,-0.4246447188\O,0,-0.7090696151,1.9254992825,-0
.1139517299\C,0,0.2283678752,-0.1101646449,0.6722609085\F,0,0.25324116
32,0.496210368,1.8361511432\F,0,-0.5422383866,-1.1956020857,0.78378435
41\F,0,1.4671365396,-0.5247339632,0.3919129403\N,0,-0.2988868608,0.353
157989,-1.6782520114\H,0,-0.6324546049,1.024748487,-2.3479060428\\Vers
ion=AM64L-G09RevC.01\State=1-A\HF=-543.7645837\MP2=-545.4168355\RMSD=8
.251e-09\PG=C01 [X(C3H4F3N1O1)]\\@
```

### aux\_f

```
1\1\GINC-IBLIS\SP\RMP2-FC\GTMP2large\C6H13F3N2O1\LOCAL\26-Jun-2014\0\#\
#p MP2(FC)/GTMP2large scf=tight int=finegrid\\Title Card Required\\0,1
\N,0,0.094314,0.705627,-0.031601\C,0,0.50861,2.088331,0.006614\H,0,-0.
306549,2.688798,-0.386755\H,0,0.726765,2.422838,1.019926\H,0,1.380126,
2.265306,-0.615331\C,0,0.853417,-0.389941,-0.00227\O,0,0.431133,-1.526
456,0.007552\C,0,2.381536,-0.179441,0.001962\F,0,3.014897,-1.323216,0.
139274\F,0,2.791417,0.383585,-1.139691\F,0,2.760912,0.623417,1.001263\
H,0,-0.916803,0.510266,-0.016979\C,0,-2.833406,-0.86067,-1.183876\H,0,
-3.795935,-1.386689,-1.23944\H,0,-2.729315,-0.244397,-2.075385\H,0,-2.
032042,-1.595887,-1.177872\C,0,-3.741054,1.006366,-0.002779\H,0,-4.761
073,0.598243,0.010656\H,0,-3.619435,1.642787,0.872219\H,0,-3.635467,1.
623774,-0.893333\C,0,-2.816252,-0.838647,1.198817\H,0,-2.014052,-1.572
975,1.19531\H,0,-2.701054,-0.205678,2.077241\H,0,-3.777356,-1.3643,1.2
77343\N,0,-2.735602,-0.031411,-0.000746\\Version=AM64L-G09RevC.01\Stat
e=1-A\HF=-717.1009332\MP2=-719.5033379\RMSD=3.414e-09\PG=C01 [X(C6H13F
3N2O1)]\\@
```

### aux\_b

```
1\1\GINC-ANGIE\SP\RMP2-FC\GTMP2large\C6H13F3N2O1\PASCAL\26-Jun-2014\0\
#\p MP2(FC)/GTMP2large scf=tight int=finegrid\\Title Card Required\\0,
1\N,0,0.340993,1.218351,0.026299\C,0,1.305946,2.286806,0.003352\H,0,0.
830584,3.171304,-0.422488\H,0,1.634812,2.557429,1.010271\H,0,2.200268,
2.089857,-0.590657\C,0,0.67003,-0.028916,0.036399\O,0,-0.135596,-0.995
708,0.058481\C,0,2.156302,-0.462279,-0.000244\F,0,2.312852,-1.764338,0
.190074\F,0,2.721939,-0.173972,-1.184717\F,0,2.890853,0.153257,0.93854
\C,0,-2.802586,-0.805862,-1.227571\H,0,-3.272476,-1.784772,-1.239539\H
,0,-3.091611,-0.239252,-2.106942\H,0,-1.718932,-0.90439,-1.139033\C,0,
-2.769601,1.324357,-0.013536\H,0,-1.667083,1.31449,0.010251\H,0,-3.129
721,1.816378,-0.91242\C,0,-2.861396,-0.794201,1.216277\H,0,-1.774184,-
0.887015,1.183831\H,0,-3.198173,-0.222491,2.075145\H,0,-3.326086,-1.77
5647,1.21192\N,0,-3.266279,-0.075795,-0.019496\H,0,-3.16871,1.822556,0
.865262\H,0,-4.279884,-0.044629,-0.044203\\Version=AM64L-G09RevC.01\St
ate=1-A\HF=-717.0363719\MP2=-719.4470663\RMSD=2.958e-09\PG=C01 [X(C6H1
3F3N2O1)]\\@
```



## Azide (N3)

### \_sil\_01

1\1\GINC-LIEBIG\SP\RMP2-FC\GTMP2large\C6H15N3Si1\PASCAL\25-Jun-2014\0\ \#p MP2(FC)/GTMP2large scf=tight int=finegrid\Title Card Required\0, 1\N,0,2.529316,-0.743796,-0.00194\N,0,3.655346,-0.720287,0.000263\N,0, 1.324941,-0.857628,-0.003601\C,0,0.458974,1.522729,-1.530322\H,0,0.351 736,0.938668,-2.443462\H,0,-0.240977,2.357512,-1.580802\H,0,1.464629,1 .945239,-1.525169\C,0,-1.515733,-0.374514,-0.000041\Si,0,0.166694,0.48 3277,0.000202\C,0,0.461661,1.516659,1.534309\H,0,-0.236976,2.352343,1. 588129\H,0,0.354024,0.929591,2.445474\H,0,1.467943,1.937691,1.530131\C ,0,-1.651623,-1.247448,-1.247015\H,0,-0.873514,-2.008929,-1.292099\H,0 , -2.617485,-1.759675,-1.241112\H,0,-1.603099,-0.661086,-2.165228\C,0,- 2.622902,0.680333,0.003281\H,0,-3.601989,0.19453,0.003058\H,0,-2.58155 9,1.318556,0.887115\H,0,-2.583188,1.322583,-0.877702\C,0,-1.649463,-1. 252889,1.243329\H,0,-1.599546,-0.670508,2.163996\H,0,-2.615265,-1.7652 12,1.236743\H,0,-0.87116,-2.014418,1.283812\Version=AM64L-G09RevC.01\ State=1-A\HF=-688.3546652\MP2=-690.133221\RMSD=2.527e-09\PG=C01 [X(C6H 15N3Si1)]\@

### \_sil\_02

1\1\GINC-TOFU\SP\RMP2-FC\GTMP2large\C6H15N3Si1\ROOT\21-Jun-2014\0\ \#p MP2(FC)/GTMP2large scf=tight int=finegrid\Title Card Required\0,1\N, 0,2.407316,-0.523925,-0.357136\N,0,3.310347,-1.081211,0.020795\N,0,1.4 76247,0.07393,-0.844692\C,0,-1.280078,-0.61495,0.003113\C,0,-0.770893, -1.888254,0.677523\H,0,-1.549181,-2.655919,0.666521\H,0,0.09641,-2.303 333,0.163127\H,0,-0.497614,-1.723109,1.720434\C,0,-1.665058,-0.934595, -1.440916\H,0,-2.42244,-1.722905,-1.461182\H,0,-2.086208,-0.069122,-1. 953297\H,0,-0.81038,-1.283534,-2.020585\C,0,-2.511167,-0.105755,0.7540 14\H,0,-3.303067,-0.858997,0.729737\H,0,-2.297423,0.101268,1.803442\H, 0,-2.919484,0.802812,0.309034\C,0,0.604213,1.147895,1.768729\H,0,1.393 685,1.899696,1.751217\H,0,-0.227101,1.561609,2.340377\H,0,0.982687,0.2 85336,2.316966\C,0,-0.411511,2.235023,-0.936956\H,0,-1.322955,2.688475 , -0.547221\H,0,0.380557,2.981806,-0.884847\H,0,-0.57315,2.002325,-1.98 8688\Si,0,0.071805,0.712561,0.026368\Version=AM64L-G09RevC.01\State=1 -A\HF=-688.3544353\MP2=-690.1335115\RMSD=1.507e-09\PG=C01 [X(C6H15N3Si 1)]\@

### -\_01

1\1\GINC-SOLARIS\SP\RMP2-FC\GTMP2large\N3(1-)\PASCAL\25-Jun-2014\0\ \#p MP2(FC)/GTMP2large scf=tight int=finegrid geom=check guess=read\Titl e Card Required\ -1,1\N,0,0.6565192335,-0.125,0.\N,0,-0.51594447,-0.12 5,0.\N,0,-1.6884081735,-0.125,0.\Version=AM64L-G09RevC.01\State=1-SGG \HF=-163.3337122\MP2=-163.9660209\RMSD=5.935e-10\PG=D\*H [O(N1),C\*(N1.N 1)]\@

### \_H\_01

1\1\GINC-EDDY\SP\RMP2-FC\GTMP2large\H1N3\PASCAL\24-Nov-2013\0\ \#p MP2( FC)/GTMP2large scf=tight int=finegrid geom=check guess=read\Title Car d Required\0,1\N,0,-0.6102646995,0.0785865681,0.21734702\H,0,-1.34571 68493,0.5857284804,-0.2596134301\N,0,0.4767314527,0.6146521245,0.01171 80082\N,0,1.5277804869,0.9927952886,-0.0878141688\Version=AM64L-G09Re vC.01\State=1-A'\HF=-163.9015365\MP2=-164.5067185\RMSD=9.050e-09\PG=CS [SG(H1N3)]\@

### \_aux\_f

1\1\GINC-ANGIE\SP\RMP2-FC\GTMP2large\C3H10N4\PASCAL\26-Jun-2014\0\ \#p MP2(FC)/GTMP2large scf=tight int=finegrid\Title Card Required\0,1\H, 0,-0.587561,0.570382,0.006643\C,0,1.917927,1.180063,-0.131662\H,0,1.70 2017,1.846529,0.700766\H,0,2.997567,0.981886,-0.148288\H,0,1.64659,1.6 90554,-1.053365\C,0,1.352729,-0.915645,-1.127412\H,0,2.398478,-1.23933 8,-1.211498\H,0,0.728145,-1.801093,-1.026661\H,0,1.07621,-0.406062,-2. 048236\C,0,1.427875,-0.703928,1.25182\H,0,1.207867,-0.037776,2.083524\ H,0,0.801453,-1.588497,1.348732\H,0,2.478195,-1.015008,1.325075\N,0,1. 142983,-0.035133,0.001121\N,0,-1.541863,0.992507,0.005341\N,0,-2.40774

4,0.134352,0.002777\N,0,-3.284825,-0.572371,0.000307\\Version=AM64L-G09RevC.01\State=1-A\HF=-337.2358024\MP2=-338.5920111\RMSD=8.309e-09\PG=C01 [X(C3H10N4)]\\@

#### aux\_b

1\1\GINC-STEAK\SP\RMP2-FC\GTMP2large\C3H10N4\ROOT\26-Jun-2014\0\\#p MP2(FC)/GTMP2large scf=tight int=finegrid\\Title Card Required\\0,1\H,0,-2.835354,-0.030655,0.006672\C,0,-1.352489,-0.894325,-1.099075\H,0,-1.74733,-0.514297,-2.036126\H,0,-0.260437,-0.858822,-1.081318\H,0,-1.720548,-1.899287,-0.91738\C,0,-1.349859,-0.513546,1.321221\H,0,-0.257787,-0.48462,1.291048\H,0,-1.74354,0.135585,2.09719\H,0,-1.717097,-1.525966,1.457479\C,0,-1.388388,1.391781,-0.218343\H,0,-1.783061,1.727994,-1.172091\H,0,-1.781582,2.004803,0.586681\H,0,-0.295887,1.385036,-0.218276\N,0,-1.820886,-0.013297,0.002878\N,0,1.274416,0.044241,-0.010248\N,0,3.611462,-0.02021,0.004755\N,0,2.461728,0.01166,-0.002628\\Version=AM64L-G09RevC.01\State=1-A\HF=-337.1824193\MP2=-338.5541368\RMSD=3.977e-09\PG=C01 [X(C3H10N4)]\\@

#### **Imidazole (Imi)**

##### sil\_01

1\1\GINC-ANGIE\SP\RMP2-FC\GTMP2large\C9H18N2Si1\PASCAL\25-Jun-2014\0\\#p MP2(FC)/GTMP2large scf=tight int=finegrid\\Title Card Required\\0,1\C,0,-2.032652,0.043984,1.064159\C,0,-3.189005,-0.633561,-0.570612\C,0,-1.989676,-0.25012,-1.085922\N,0,-1.229563,0.194802,-0.026439\H,0,-1.707482,0.31739,2.053151\H,0,-4.041877,-1.029138,-1.093407\H,0,-1.620217,-0.245204,-2.094991\Si,0,0.466087,0.75731,-0.065487\N,0,-3.205515,-0.444267,0.781555\C,0,0.668606,1.91932,1.385404\H,0,0.545833,1.42332,2.347277\H,0,1.662485,2.367559,1.37574\H,0,-0.057229,2.730657,1.332925\C,0,0.679754,1.676834,-1.679914\H,0,1.666122,2.138813,-1.730797\H,0,0.577593,1.030863,-2.551168\H,0,-0.061023,2.471538,-1.766799\C,0,1.616595,-0.744038,0.061334\C,0,1.358549,-1.705868,-1.09784\H,0,2.025296,-2.569002,-1.023273\H,0,0.336047,-2.08359,-1.092967\H,0,1.543042,-1.240651,-2.06702\C,0,1.372972,-1.478365,1.379355\H,0,0.346269,-1.835241,1.464118\H,0,2.027275,-2.35141,1.447919\H,0,1.585064,-0.85015,2.245269\C,0,3.069983,-0.270181,0.0095\H,0,3.746002,-1.125502,0.088012\H,0,3.303882,0.239482,-0.926161\H,0,3.312487,0.40615,0.830394\\Version=AM64L-G09RevC.01\State=1-A\HF=-749.3351614\MP2=-751.3793855\RMSD=5.175e-09\PG=C01 [X(C9H18N2Si1)]\\@

##### sil\_02

1\1\GINC-STEAK\SP\RMP2-FC\GTMP2large\C9H18N2Si1\ROOT\25-Jun-2014\0\\#p MP2(FC)/GTMP2large scf=tight int=finegrid\\Title Card Required\\0,1\C,0,2.032918,-0.045492,-1.063972\C,0,3.188872,0.634416,0.570096\C,0,1.989396,0.251768,1.085661\N,0,1.22954,-0.194661,0.02663\H,0,1.707983,-0.320366,-2.052637\H,0,4.041629,1.030703,1.09254\H,0,1.619665,0.248457,2.094637\Si,0,-0.466071,-0.757244,0.066138\N,0,3.205739,0.443095,-0.781776\C,0,-1.616592,0.743961,-0.061991\C,0,-0.679775,-1.675512,1.681262\H,0,-1.666409,-2.136847,1.732787\H,0,0.060555,-2.4706,1.768442\H,0,-0.576923,-1.029015,2.552042\C,0,-0.668589,-1.920515,-1.383749\H,0,0.057655,-2.731466,-1.330939\H,0,-1.662244,-2.369234,-1.373191\H,0,-0.54655,-1.425262,-2.3461\C,0,-1.359386,1.706298,1.096953\H,0,-0.336844,2.083925,1.092708\H,0,-2.025979,2.569471,1.021431\H,0,-1.544725,1.241582,2.066213\C,0,-1.372147,1.477782,-1.380148\H,0,-2.026465,2.350757,-1.449473\H,0,-0.345407,1.83468,-1.464384\H,0,-1.583643,0.849215,-2.245956\C,0,-3.069997,0.270089,-0.010925\H,0,-3.304485,-0.239362,0.924709\H,0,-3.745966,1.125396,-0.090036\H,0,-3.312002,-0.40642,-0.831819\\Version=AM64L-G09RevC.01\State=1-A\HF=-749.3351618\MP2=-751.3793856\RMSD=5.176e-09\PG=C01 [X(C9H18N2Si1)]\\@

##### -\_01

1\1\GINC-SOLARIS\SP\RMP2-FC\GTMP2large\C3H3N2(1-)\PASCAL\25-Jun-2014\0\\#p MP2(FC)/GTMP2large scf=tight int=finegrid geom=check guess=read\\Title Card Required\\-1,1\N,0,3.429213749,5.6517956341,-0.1672935643\C,0,2.3002715966,5.7979883123,-0.8672915592\C,0,2.9991680018,5.77017077

03,1.1155177348\H,0,2.2917964862,5.7554112787,-1.9486360716\C,0,1.6323  
633181,5.9814789872,1.1177586516\H,0,3.6812584947,5.6985066808,1.95126  
70484\H,0,0.9633185987,6.1190538453,1.9557767592\N,0,1.182176975,5.999  
3202113,-0.1635419688\\Version=AM64L-G09RevC.01\State=1-A\HF=-224.3111  
979\MP2=-225.1998913\RMSD=9.890e-09\PG=C01 [X(C3H3N2)]\\@

#### H\_01

1\1\GINC-SOLARIS\SP\RMP2-FC\GTMP2large\C3H4N2\PASCAL\28-Oct-2013\0\\#p  
MP2(FC)/GTMP2large scf=tight int=finegrid geom=check guess=read\\Titl  
e Card Required\\0,1\C,0,2.2312692201,5.946956949,-0.8876522708\C,0,2.  
9637430449,5.9688266741,1.1757726211\H,0,2.2554190241,5.9595501724,-1.  
9629063688\C,0,1.6037798337,5.8872015703,1.1385142127\H,0,3.6661132208  
,6.0012548499,1.9872765398\H,0,0.9215058054,5.8360638102,1.9679784427\  
N,0,1.1590376846,5.8740115555,-0.1516427421\N,0,3.3524700897,6.0055168  
163,-0.1343022881\H,0,4.2934607468,6.0672362923,-0.4727884765\\Version  
=AM64L-G09RevC.01\State=1-A\HF=-224.8916444\MP2=-225.7629412\RMSD=5.82  
0e-09\PG=C01 [X(C3H4N2)]\\@

#### aux\_f

1\1\GINC-IBLIS\SP\RMP2-FC\GTMP2large\C6H13N3\LOCAL\26-Jun-2014\0\\#p M  
P2(FC)/GTMP2large scf=tight int=finegrid\\Title Card Required\\0,1\H,0  
,0.029277,-0.039406,0.004594\C,0,-2.360717,-0.935978,-1.00984\H,0,-2.0  
15689,-1.941499,-0.776568\H,0,-3.456251,-0.957438,-1.08457\H,0,-1.9565  
79,-0.654424,-1.980239\C,0,-2.300959,1.343027,-0.312313\H,0,-3.39297,1  
.455851,-0.342903\H,0,-1.909613,2.028459,0.437245\H,0,-1.900871,1.6319  
82,-1.282404\C,0,-2.361124,-0.399057,1.316219\H,0,-2.010716,-1.402538,  
1.549695\H,0,-1.960958,0.282222,2.064435\H,0,-3.45677,-0.390295,1.3912  
29\N,0,-1.898907,-0.010696,0.001617\C,0,1.843767,1.064547,0.001472\C,0  
,3.149119,-0.603334,0.00047\C,0,1.882506,-1.112396,0.001886\N,0,1.0533  
89,-0.028607,0.002345\H,0,1.445172,2.064175,0.001257\H,0,4.081003,-1.1  
40485,-0.000481\H,0,1.510868,-2.12036,0.002167\N,0,3.113881,0.759718,0  
.000207\\Version=AM64L-G09RevC.01\State=1-A\HF=-398.2282343\MP2=-399.8  
469631\RMSD=9.232e-09\PG=C01 [X(C6H13N3)]\\@

#### aux\_b

1\1\GINC-SOLARIS\SP\RMP2-FC\GTMP2large\C6H13N3\PASCAL\25-Jun-2014\0\\#  
p MP2(FC)/GTMP2large scf=tight int=finegrid\\Title Card Required\\0,1\  
H,0,-3.390472,-0.121874,0.009629\C,0,-1.869915,-0.697199,-1.22748\H,0,  
-2.331891,-0.222198,-2.087478\H,0,-0.787878,-0.551905,-1.227697\H,0,-2  
.131564,-1.749946,-1.194346\C,0,-1.857681,-0.703941,1.22796\H,0,-0.775  
66,-0.560628,1.217732\H,0,-2.309648,-0.232717,2.095302\H,0,-2.120913,-  
1.756206,1.192349\C,0,-2.028493,1.403161,0.006921\H,0,-2.447664,1.8664  
03,-0.880597\H,0,-2.438607,1.861557,0.901155\H,0,-0.940385,1.442833,0.  
001363\N,0,-2.379436,-0.039744,0.004699\C,0,1.553931,-0.9828,-0.007493  
\C,0,3.031173,0.51094,0.007581\C,0,1.797319,1.120388,-0.006002\N,0,0.8  
33585,0.154135,-0.015816\H,0,1.087012,-1.960004,-0.012871\H,0,4.010179  
,0.962571,0.017715\H,0,1.554697,2.172943,-0.009584\N,0,2.869394,-0.836  
408,0.006604\\Version=AM64L-G09RevC.01\State=1-A\HF=-398.1532042\MP2=-  
399.7840402\RMSD=1.609e-09\PG=C01 [X(C6H13N3)]\\@

### **Cyanide (CN)**

#### sil\_01

1\1\GINC-STEAK\SP\RMP2-FC\GTMP2large\C7H15N1Si1\ROOT\24-Jun-2014\0\\#p  
MP2(FC)/GTMP2large scf=tight int=finegrid\\Title Card Required\\0,1\S  
i,0,-0.56223,0.464554,0.00001\C,0,-0.951348,1.445386,1.544163\H,0,-0.8  
1625,0.851264,2.446633\H,0,-0.311788,2.325093,1.61966\H,0,-1.98517,1.7  
89396,1.52669\C,0,1.18519,-0.268522,0.000004\C,0,-0.951291,1.445513,-1  
.544079\H,0,-0.815782,0.851595,-2.446622\H,0,-1.985222,1.789202,-1.526  
809\H,0,-0.311983,2.325431,-1.619256\C,0,2.202315,0.873539,-0.00009\H,  
0,2.109842,1.507693,0.882614\H,0,3.217088,0.467957,0.000038\H,0,2.1099  
8,1.507467,-0.882973\C,0,1.389948,-1.128924,1.246209\H,0,0.680546,-1.9  
55428,1.293475\H,0,2.394143,-1.560343,1.239592\H,0,1.293926,-0.549931,  
2.165116\C,0,1.389882,-1.129009,-1.246137\H,0,2.39406,-1.560471,-1.239  
501\H,0,0.680432,-1.955473,-1.293299\H,0,1.293866,-0.550091,-2.165091\

C,0,-1.740025,-0.993095,-0.000046\N,0,-2.460644,-1.89378,-0.000077\\Version=AM64L-G09RevC.01\State=1-A\HF=-617.3531308\MP2=-618.8579273\RMSD=2.713e-09\PG=C01 [X(C7H15N1Si1)]\\@

#### -\_01

1\1\GINC-IBLIS\SP\RMP2-FC\GTMP2large\C1N1(1-)\LOCAL\26-Jun-2014\0\\#p MP2(FC)/GTMP2large scf=tight int=finegrid geom=check guess=read\\Title Card Required\\-1,1\N,0,5.3783705355,-0.8570579323,-0.0006350031\C,0,4.2054029445,-0.8568744477,-0.0003953969\\Version=AM64L-G09RevC.01\State=1-SG\HF=-92.3397725\MP2=-92.6812171\RMSD=1.869e-09\PG=C\*V [C\*(C1N1)]\\@

#### \_H\_01

1\1\GINC-GOLEM\SP\RMP2-FC\GTMP2large\C1H1N1\ROOT\18-Jun-2014\0\\#p MP2(FC)/GTMP2large scf=tight int=finegrid geom=check guess=read\\Title Card Required\\0,1\N,0,5.3635037492,-0.8570556069,-0.000631966\C,0,4.217206581,-0.8568762937,-0.0003978086\H,0,3.1516499399,-0.8567096105,-0.001801442\\Version=AM64L-G09RevC.01\State=1-SG\HF=-92.907093\MP2=-93.248191\RMSD=7.694e-09\PG=C\*V [C\*(H1C1N1)]\\@

#### \_aux\_f

1\1\GINC-PHOBOBOS\SP\RMP2-FC\GTMP2large\C4H10N2\ROOT\25-Jun-2014\0\\#p MP2(FC)/GTMP2large scf=tight int=finegrid\\Title Card Required\\0,1\H,0,1.186796,-0.000893,0.000617\C,0,-1.204079,0.746274,1.158514\H,0,-0.819312,1.76332,1.109642\H,0,-2.298715,0.795624,1.234272\H,0,-0.820013,0.281103,2.064542\C,0,-1.205655,-1.376162,0.066712\H,0,-2.300363,-1.465339,0.071174\H,0,-0.821869,-1.928345,-0.789188\H,0,-0.821677,-1.843219,0.971789\C,0,-1.203749,0.630651,-1.225433\H,0,-0.8187,1.647539,-1.275184\H,0,-0.819672,0.079563,-2.0819\H,0,-2.298339,0.672659,-1.305899\N,0,-0.767386,-0.000146,0.000025\C,0,2.280454,-0.000666,0.000299\N,0,3.42882,-0.000224,-0.000085\\Version=AM64L-G09RevC.01\State=1-A\HF=-266.2437986\MP2=-267.3285344\RMSD=5.527e-09\PG=C01 [X(C4H10N2)]\\@

#### \_aux\_b

1\1\GINC-PHOBOBOS\SP\RMP2-FC\GTMP2large\C4H10N2\ROOT\25-Jun-2014\0\\#p MP2(FC)/GTMP2large scf=tight int=finegrid\\Title Card Required\\0,1\H,0,2.352078,0.01355,0.005882\C,0,0.877414,-0.684341,1.235939\H,0,1.24923,-0.139332,2.097839\H,0,-0.212984,-0.678571,1.201456\H,0,1.267754,-1.697143,1.233059\C,0,0.886068,-0.725889,-1.210639\H,0,-0.204714,-0.717415,-1.18417\H,0,1.265118,-0.211054,-2.08776\H,0,1.275112,-1.7384,-1.169927\C,0,0.865619,1.414602,-0.023336\H,0,1.238494,1.921082,0.861255\H,0,1.246928,1.892009,-0.920463\H,0,-0.224495,1.37355,-0.027666\N,0,1.337953,0.005387,0.002287\C,0,-2.017755,-0.020224,-0.009381\N,0,-3.183752,0.00559,0.002713\\Version=AM64L-G09RevC.01\State=1-A\HF=-266.1852634\MP2=-267.2683551\RMSD=3.939e-09\PG=C01 [X(C4H10N2)]\\@

#### **NMe3**

1\1\GINC-HP1\SP\RMP2-FC\GTMP2large\C3H9N1\ROOT\10-Apr-2015\0\\#p MP2(FC)/GTMP2large scf=tight int=finegrid geom=check guess=read\\Title Card Required\\0,1\N,0,-0.818472077,3.1018935436,0.0049609704\C,0,-0.3977059929,3.7963036617,1.1934187091\H,0,-0.6704391456,4.8481017592,1.1238108356\H,0,-0.8976073647,3.3757970311,2.0644988767\H,0,0.6897565888,3.7354506258,1.3607884624\C,0,-0.5434901754,1.6917975348,0.0926850036\H,0,-1.0434425711,1.2705543345,0.9633799184\H,0,-0.9242202408,1.1845776326,-0.7923463261\H,0,0.5329159894,1.471336667,0.1765740211\C,0,-0.2366926356,3.6801895296,-1.1777426021\H,0,-0.617315323,3.1736655575,-2.0632185769\H,0,-0.5093694342,4.7319469875,-1.2481803736\H,0,0.8629813588,3.6105302826,-1.1902040742\\Version=AM64L-G09RevC.01\State=1-A1\HF=-173.3296747\MP2=-174.0673203\RMSD=5.785e-09\PG=C03V [C3(N1),3SGV(C1H1),X(H6)]\\@

Compound **4b**

1  
1\1\GINC-AZAZEL\SP\RMP2-FC\GTMP2large\C12H12O1\ROOT\21-Nov-2012\0\#\#p  
MP2(FC)/GTMP2large scf=tight int=finegrid\Title Card Required\0,1\C,  
0,0.80634,-1.560078,-0.19746\C,0,2.124725,-1.923165,-0.176487\C,0,3.13  
1724,-0.949556,-0.048149\C,0,2.79039,0.368565,0.056874\H,0,0.056899,-2  
.330791,-0.292476\H,0,2.395448,-2.966022,-0.259117\H,0,4.170137,-1.247  
426,-0.032667\H,0,3.556274,1.125571,0.156966\C,0,0.415336,-0.203347,-0  
.091814\C,0,1.437507,0.77536,0.040319\C,0,1.087609,2.139226,0.155579\C  
,0,-0.222185,2.518295,0.142132\C,0,-1.23681,1.552232,0.008485\C,0,-0.9  
46159,0.218845,-0.111005\H,0,1.874781,2.873773,0.255963\H,0,-0.489871,  
3.561164,0.23387\H,0,-2.271706,1.861985,0.004461\C,0,-2.076677,-0.7805  
4,-0.229749\H,0,-1.772213,-1.583723,-0.905806\C,0,-2.44395,-1.38038,1.  
112533\H,0,-2.801349,-0.596066,1.777215\H,0,-3.235289,-2.117205,0.9878  
53\H,0,-1.583952,-1.858309,1.576858\O,0,-3.253359,-0.190284,-0.73223\H  
,0,-3.079387,0.146579,-1.612822\Version=AM64L-G09RevC.01\State=1-A\HF  
=-536.443853\MP2=-538.579167\RMSD=4.591e-10\PG=C01 [X(C12H12O1)]\@

2  
1\1\GINC-CALYPSO\SP\RMP2-FC\GTMP2large\C12H12O1\ROOT\19-Aug-2012\0\#\#p  
MP2(FC)/GTMP2large scf=tight int=finegrid\Title Card Required\0,1\C,  
0,-0.382144,-1.53886,-0.066506\C,0,-1.601674,-2.154202,-0.001534\C,0,  
-2.784755,-1.397401,0.080324\C,0,-2.717591,-0.033777,0.087163\H,0,0.51  
3557,-2.130097,-0.161613\H,0,-1.657545,-3.233286,-0.019585\H,0,-3.7417  
85,-1.896465,0.131103\H,0,-3.620426,0.559185,0.14222\C,0,-0.27435,-0.1  
26374,-0.048049\C,0,-1.473805,0.633885,0.022646\C,0,-1.41174,2.045572,  
0.026328\C,0,-0.209841,2.685058,-0.041103\C,0,0.978709,1.934875,-0.105  
776\C,0,0.974688,0.56382,-0.099435\H,0,-2.333918,2.60788,0.079387\H,0,  
-0.16174,3.764416,-0.045385\H,0,1.92451,2.458602,-0.154466\C,0,2.31126  
3,-0.145859,-0.096795\H,0,3.070694,0.611282,-0.314654\C,0,2.653556,-0.  
763631,1.244352\H,0,2.688009,0.005719,2.013032\H,0,1.919192,-1.508673,  
1.540112\H,0,3.62857,-1.244139,1.184827\O,0,2.405141,-1.174044,-1.0609  
95\H,0,2.155855,-0.820705,-1.916703\Version=AM64L-G09RevC.01\State=1-  
A\HF=-536.4428908\MP2=-538.5784948\RMSD=5.031e-09\PG=C01 [X(C12H12O1)]  
\@

3  
1\1\GINC-CALYPSO\SP\RMP2-FC\GTMP2large\C12H12O1\ROOT\19-Aug-2012\0\#\#p  
MP2(FC)/GTMP2large scf=tight int=finegrid\Title Card Required\0,1\C,  
0,-0.768884,-1.541703,-0.170269\C,0,-2.083548,-1.919112,-0.168708\C,0,  
-3.105585,-0.957843,-0.068349\C,0,-2.784819,0.365986,0.031023\H,0,0.0  
01306,-2.294945,-0.21214\H,0,-2.339937,-2.96661,-0.238024\H,0,-4.14009  
1,-1.269867,-0.066243\H,0,-3.561812,1.113899,0.112434\C,0,-0.401902,-0  
.178023,-0.078926\C,0,-1.436718,0.788068,0.028198\C,0,-1.104055,2.1582  
05,0.128466\C,0,0.199567,2.554028,0.114516\C,0,1.227389,1.597945,-0.00  
5761\C,0,0.958837,0.257866,-0.101273\H,0,-1.90073,2.88456,0.213498\H,0  
,0.454688,3.601351,0.188748\H,0,2.248676,1.946531,-0.031949\C,0,2.0652  
19,-0.765913,-0.236455\H,0,1.829241,-1.403911,-1.088753\C,0,3.451679,-  
0.197056,-0.460997\H,0,3.497785,0.411614,-1.363111\H,0,3.781505,0.4088  
21,0.383213\H,0,4.151642,-1.022641,-0.566917\O,0,2.07513,-1.655542,0.8  
65802\H,0,2.073604,-1.139144,1.674039\Version=AM64L-G09RevC.01\State=  
1-A\HF=-536.4419721\MP2=-538.5774288\RMSD=1.442e-09\PG=C01 [X(C12H12O1  
)]\@

4  
1\1\GINC-NAUTILUS\SP\RMP2-FC\GTMP2large\C12H12O1\ROOT\30-Aug-2012\0\#\#  
p MP2(FC)/GTMP2large scf=tight int=finegrid\Title Card Required\0,1\C,  
0,0.786481,-1.551795,-0.216187\C,0,2.100629,-1.929233,-0.189254\C,0,  
3.116032,-0.967268,-0.047511\C,0,2.787173,0.353676,0.063413\H,0,0.0314  
29,-2.315122,-0.324145\H,0,2.358471,-2.974333,-0.277776\H,0,4.15158,-1  
.272748,-0.028067\H,0,3.561715,1.099673,0.171816\C,0,0.407069,-0.19265  
7,-0.104049\C,0,1.439532,0.7767,0.040739\C,0,1.099643,2.141365,0.15924  
3\C,0,-0.207725,2.530763,0.132853\C,0,-1.229986,1.577226,-0.014691\C,0  
, -0.947403,0.241614,-0.131353\H,0,1.889163,2.87126,0.267374\H,0,-0.463  
751,3.576445,0.219453\H,0,-2.258884,1.896463,-0.055183\C,0,-2.076252,-

0.753099,-0.241104\H,0,-1.807151,-1.508681,-0.982162\C,0,-2.35125,-1.435516,1.089466\H,0,-1.465694,-1.940341,1.470096\H,0,-2.662501,-0.693009,1.820754\H,0,-3.146907,-2.173616,0.98763\O,0,-3.235942,-0.075579,-0.682574\H,0,-3.843596,-0.712008,-1.058582\\Version=AM64L-G09RevC.01\State=1-A\HF=-536.4413553\MP2=-538.5770295\RMSD=6.363e-09\PG=C01 [X(C12H12O1)]\\@

5  
1\1\GINC-NAUTILUS\SP\RMP2-FC\GTMP2large\C12H12O1\ROOT\30-Aug-2012\0\\#p MP2(FC)/GTMP2large scf=tight int=finegrid\\Title Card Required\\0,1\C,0,0.786045,-1.542898,-0.250198\C,0,2.099895,-1.920752,-0.212832\C,0,3.112973,-0.963016,-0.027233\C,0,2.782301,0.355502,0.103522\H,0,0.033162,-2.300826,-0.403161\H,0,2.362299,-2.962302,-0.331068\H,0,4.147662,-1.272325,0.004379\H,0,3.553366,1.102018,0.237068\C,0,0.404948,-0.18678,-0.106531\C,0,1.434734,0.777761,0.061851\C,0,1.098765,2.145419,0.174048\C,0,-0.20401,2.540454,0.107215\C,0,-1.225972,1.586327,-0.056552\C,0,-0.953009,0.248219,-0.1438\H,0,1.891125,2.869956,0.30205\H,0,-0.461512,3.587666,0.175462\H,0,-2.248167,1.923123,-0.138414\C,0,-2.082987,-0.753432,-0.263886\H,0,-1.839626,-1.462433,-1.054431\C,0,-2.305265,-1.50855,1.03798\H,0,-3.089782,-2.252927,0.909752\H,0,-1.40194,-2.006939,1.381173\H,0,-2.60658,-0.813853,1.824405\O,0,-3.285615,-0.159535,-0.690089\H,0,-3.745595,0.195613,0.071986\\Version=AM64L-G09RevC.01\State=1-A\HF=-536.4408621\MP2=-538.5767324\RMSD=4.595e-09\PG=C01 [X(C12H12O1)]\\@

6  
1\1\GINC-GOLEM\SP\RMP2-FC\GTMP2large\C12H12O1\ROOT\11-Jun-2014\0\\#p MP2(FC)/GTMP2large scf=tight int=finegrid\\Title Card Required\\0,1\C,0,-0.383204,-1.54037,-0.087408\C,0,-1.59984,-2.159087,-0.007666\C,0,-2.783677,-1.405341,0.090248\C,0,-2.719102,-0.041765,0.097297\H,0,0.511833,-2.127751,-0.204265\H,0,-1.653742,-3.238209,-0.031627\H,0,-3.739093,-1.906511,0.150818\H,0,-3.622478,0.5495,0.161563\C,0,-0.277054,-0.128373,-0.064508\C,0,-1.47758,0.628854,0.019213\C,0,-1.41996,2.040428,0.021466\C,0,-0.220398,2.682407,-0.057798\C,0,0.969355,1.935389,-0.131263\C,0,0.968623,0.565046,-0.1246\H,0,-2.343153,2.600228,0.083113\H,0,-0.174459,3.761848,-0.064897\H,0,1.912275,2.462517,-0.189827\C,0,2.30531,-0.134233,-0.101568\H,0,3.057612,0.624431,-0.334712\C,0,2.631371,-0.710901,1.26884\H,0,2.645678,0.078543,2.018548\H,0,1.898395,-1.455206,1.571013\H,0,3.616392,-1.181338,1.259982\O,0,2.339203,-1.129891,-1.104681\H,0,3.214057,-1.521255,-1.115768\\Version=AM64L-G09RevC.01\State=1-A\HF=-536.439961\MP2=-538.5756612\RMSD=4.360e-09\PG=C01 [X(C12H12O1)]\\@

7  
1\1\GINC-AZAZEL\SP\RMP2-FC\GTMP2large\C12H12O1\ROOT\21-Nov-2012\0\\#p MP2(FC)/GTMP2large scf=tight int=finegrid\\Title Card Required\\0,1\C,0,-0.76114,-1.544104,-0.161381\C,0,-2.072185,-1.932583,-0.166826\C,0,-3.102135,-0.978949,-0.073351\C,0,-2.791227,0.34705,0.025728\H,0,0.014687,-2.291538,-0.19688\H,0,-2.320193,-2.982291,-0.234007\H,0,-4.134311,-1.298599,-0.075713\H,0,-3.57404,1.089323,0.103049\C,0,-0.403336,-0.178324,-0.071498\C,0,-1.446318,0.779619,0.030087\C,0,-1.124915,2.151902,0.129851\C,0,0.176063,2.556592,0.122916\C,0,1.211117,1.608208,0.010798\C,0,0.952313,0.267789,-0.086845\H,0,-1.927234,2.872588,0.209865\H,0,0.42356,3.605542,0.19965\H,0,2.229778,1.964069,-0.000635\C,0,2.0637,-0.743549,-0.232673\H,0,1.817272,-1.373716,-1.095432\C,0,3.441236,-0.159537,-0.470881\H,0,3.465561,0.456773,-1.368185\H,0,3.770382,0.433785,0.380146\H,0,4.160939,-0.967055,-0.610768\O,0,2.058156,-1.543694,0.936625\H,0,2.749311,-2.204012,0.860359\\Version=AM64L-G09RevC.01\State=1-A\HF=-536.439598\MP2=-538.5752378\RMSD=3.133e-09\PG=C01 [X(C12H12O1)]\\@

#### Compound 5b

1  
1\1\GINC-IBLIS\SP\RMP2-FC\GTMP2large\C18H26O1Si1\LOCAL\25-Jul-2014\0\\#p MP2(FC)/GTMP2large scf=tight int=finegrid maxdisk=200GB\\Title Card

Required\\0,1\\C,0,2.92724,-1.489672,-0.027955\\C,0,4.191645,-1.81773,-0.432562\\C,0,5.132829,-0.812472,-0.71945\\C,0,4.780462,0.500681,-0.592428\\H,0,2.229825,-2.284252,0.189162\\H,0,4.470286,-2.856969,-0.53319\\H,0,6.129318,-1.08209,-1.038236\\H,0,5.495763,1.282235,-0.810013\\C,0,2.525781,-0.13901,0.114649\\C,0,3.482185,0.871901,-0.176123\\C,0,3.122381,2.23132,-0.044423\\C,0,1.864778,2.574958,0.356053\\C,0,0.914229,1.577036,0.63926\\C,0,1.217114,0.246892,0.527262\\H,0,3.859409,2.990881,-0.26634\\H,0,1.589452,3.615155,0.456684\\H,0,-0.081963,1.856183,0.946343\\C,0,0.173535,-0.790006,0.883871\\H,0,0.268956,-1.630682,0.189952\\C,0,0.371907,-1.307938,2.29836\\H,0,0.226147,-0.492985,3.004926\\H,0,-0.353933,-2.089652,2.5165\\H,0,1.374842,-1.707321,2.438752\\O,0,-1.123662,-0.257167,0.795967\\Si,0,-2.156304,-0.504015,-0.494069\\C,0,-3.729472,0.443777,-0.036734\\C,0,-4.362017,-0.170651,1.211583\\H,0,-4.672439,-1.203104,1.046446\\H,0,-3.67613,-0.157249,2.058415\\H,0,-5.254283,0.393252,1.498429\\C,0,-4.726305,0.3762,-1.193523\\H,0,-5.008779,-0.649669,-1.434993\\H,0,-5.644362,0.909014,-0.931047\\H,0,-4.333257,0.837489,-2.100406\\C,0,-3.389591,1.906139,0.248061\\H,0,-4.297257,2.461531,0.501222\\H,0,-2.700939,1.999804,1.086975\\H,0,-2.939241,2.398856,-0.614725\\C,0,-2.484157,-2.34324,-0.682484\\H,0,-2.844578,-2.787895,0.244738\\H,0,-3.231727,-2.52988,-1.454654\\H,0,-1.582753,-2.881071,-0.97949\\C,0,-1.380749,0.132099,-2.077367\\H,0,-2.015449,-0.077619,-2.939498\\H,0,-1.201753,1.206176,-2.043514\\H,0,-0.418375,-0.348284,-2.259512\\Version=AM64L-G09RevC.01\\State=1-A\\HF=-1060.9039287\\MP2=-1064.2093005\\RMSD=3.098e-09\\PG=C01 [X(C18H26O1Si1)]\\@

-2

1\\1\\GINC-IBLIS\\SP\\RMP2-FC\\GTMP2large\\C18H26O1Si1\\LOCAL\\25-Jul-2014\\0\\#p MP2(FC)/GTMP2large scf=tight int=finegrid maxdisk=200GB\\Title Card Required\\0,1\\C,0,1.567664,1.40361,0.758397\\C,0,2.27126,2.560036,0.565\\C,0,3.49419,2.547665,-0.130578\\C,0,3.981688,1.371404,-0.623444\\H,0,0.617426,1.431605,1.265519\\H,0,1.88107,3.49398,0.943898\\H,0,4.040339,3.468384,-0.277589\\H,0,4.916769,1.350548,-1.166585\\C,0,2.050564,0.163665,0.274034\\C,0,3.280225,0.158511,-0.438989\\C,0,3.787187,-1.055409,-0.955401\\C,0,3.104206,-2.22122,-0.775453\\C,0,1.888293,-2.217928,-0.066522\\C,0,1.358682,-1.070015,0.463048\\H,0,4.723311,-1.041781,-1.496634\\H,0,3.488024,-3.149253,-1.174159\\H,0,1.361783,-3.153611,0.070333\\C,0,0.083315,-1.183376,1.27231\\H,0,-0.291247,-2.19952,1.118385\\C,0,0.32563,-1.015484,2.762106\\H,0,0.725555,-0.031681,2.99438\\H,0,-0.612226,-1.1422,3.300415\\H,0,1.035309,-1.762453,3.114378\\O,0,-0.911594,-0.269732,0.877731\\Si,0,-1.8288,-0.344752,-0.51877\\C,0,-3.389348,0.647434,-0.104795\\C,0,-4.141214,-0.030791,1.039276\\H,0,-4.485493,-1.029364,0.766589\\H,0,-3.519503,-0.120975,1.929788\\H,0,-5.025624,0.553066,1.310461\\C,0,-4.300739,0.727893,-1.328831\\H,0,-4.61997,-0.258135,-1.670005\\H,0,-5.20541,1.29342,-1.088856\\H,0,-3.81854,1.232235,-2.166923\\C,0,-3.000569,2.061717,0.325364\\H,0,-3.895662,2.639319,0.57406\\H,0,-2.358546,2.050772,1.205643\\H,0,-2.477207,2.600804,-0.46531\\C,0,-2.223748,-2.138109,-0.909393\\H,0,-2.672183,-2.659664,-0.063831\\H,0,-2.921614,-2.203847,-1.74524\\H,0,-1.325811,-2.683577,-1.202568\\C,0,-0.898695,0.399629,-1.963761\\H,0,-1.500822,0.378277,-2.873343\\H,0,-0.61063,1.433163,-1.774765\\H,0,0.015317,-0.160521,-2.161314\\Version=AM64L-G09RevC.01\\State=1-A\\HF=-1060.9025501\\MP2=-1064.2107026\\RMSD=4.020e-09\\PG=C01 [X(C18H26O1Si1)]\\@

-3

1\\1\\GINC-PHOENIX\\SP\\RMP2-FC\\GTMP2large\\C18H26O1Si1\\PASCAL\\28-Jul-2014\\0\\#p MP2(FC)/GTMP2large scf=tight int=finegrid maxdisk=200GB\\Title Card Required\\0,1\\C,0,2.547311,-1.667639,-0.010333\\C,0,3.703862,-2.260801,-0.435242\\C,0,4.827775,-1.480886,-0.762954\\C,0,4.76285,-0.121162,-0.655583\\H,0,1.70353,-2.293581,0.236829\\H,0,3.755092,-3.336805,-0.521122\\H,0,5.7367,-1.9594,-1.097892\\H,0,5.620606,0.488636,-0.905056\\C,0,2.443545,-0.260812,0.114904\\C,0,3.583117,0.521504,-0.217432\\C,0,3.520787,1.928055,-0.104888\\C,0,2.375576,2.534768,0.320095\\C,0,1.244952,1.763567,0.647112\\C,0,1.257612,0.397921,0.552052\\H,0,4.394501,2.511975,-0.359982\\H,0,2.32862,3.610909,0.407776\\H,0,0.340308,2.250221,0.979298\\C,0,0.027727,-0.389845,0.952774\\H,0,-0.076415,-1.240287,0.273978\\C,0,0.154215,-0.911737,2.374077\\H,0,1.051722,-1.515361,2.496734\\H,0,0.209377,-0

.071879,3.064098\H,0,-0.714427,-1.514862,2.633517\O,0,-1.127936,0.4040  
29,0.886767\Si,0,-2.17692,0.542174,-0.406675\C,0,-3.626391,-0.657271,-  
0.147777\C,0,-3.103565,-2.086679,-0.010657\H,0,-2.439279,-2.194462,0.8  
47186\H,0,-3.935508,-2.781793,0.135337\H,0,-2.563503,-2.415152,-0.9000  
04\C,0,-4.582424,-0.590699,-1.338446\H,0,-4.099396,-0.889966,-2.269515  
\H,0,-5.428423,-1.265827,-1.181763\H,0,-4.993007,0.409937,-1.481167\C,  
0,-4.382709,-0.282958,1.126531\H,0,-5.193068,-0.994608,1.309429\H,0,-3  
.731516,-0.292381,2.000898\H,0,-4.832741,0.70793,1.056447\C,0,-1.28259  
7,0.172331,-2.012808\H,0,-1.918711,0.411437,-2.866161\H,0,-0.379173,0.  
776518,-2.097372\H,0,-0.989276,-0.872898,-2.109554\C,0,-2.758815,2.319  
231,-0.379971\H,0,-3.560843,2.496781,-1.09693\H,0,-3.123871,2.599884,0  
.607659\H,0,-1.93791,2.991039,-0.632076\\Version=AM64L-G09RevC.01\Stat  
e=1-A\HF=-1060.9028359\MP2=-1064.2089783\RMSD=9.646e-09\PG=C01 [X(C18H  
26O1Si1)]\@

4

1\1\GINC-PHOBOS\SP\RMP2-FC\GTMP2large\C18H26O1Si1\ROOT\28-Jul-2014\0\\  
#p MP2(FC)/GTMP2large scf=tight int=finegrid maxdisk=200GB\\Title Card  
Required\\0,1\C,0,-2.556835,-1.434922,0.64703\C,0,-3.730709,-1.665757  
,1.30943\C,0,-4.751368,-0.697771,1.311932\C,0,-4.566757,0.482238,0.649  
954\H,0,-1.793549,-2.197836,0.662338\H,0,-3.875664,-2.598308,1.835849\  
H,0,-5.675489,-0.890227,1.837551\H,0,-5.343685,1.234709,0.646288\C,0,-  
2.330686,-0.224275,-0.05208\C,0,-3.365108,0.750801,-0.043235\C,0,-3.17  
7722,1.972798,-0.726204\C,0,-2.010839,2.220074,-1.387444\C,0,-0.982953  
,1.2592,-1.394684\C,0,-1.120874,0.059272,-0.750201\H,0,-3.972724,2.705  
755,-0.713847\H,0,-1.866982,3.155789,-1.908655\H,0,-0.058488,1.462997,  
-1.91305\C,0,-0.005968,-0.960665,-0.822765\H,0,0.080913,-1.449297,0.15  
1368\C,0,-0.298833,-2.017254,-1.8771\H,0,-0.322267,-1.548,-2.858829\H,  
0,0.479462,-2.778939,-1.876079\H,0,-1.259656,-2.499259,-1.704888\O,0,1  
.207728,-0.332472,-1.145126\Si,0,2.648212,-0.42114,-0.308199\C,0,2.647  
242,0.782001,1.162067\C,0,2.516294,2.217348,0.654238\H,0,3.355547,2.50  
3922,0.01932\H,0,1.598063,2.36171,0.084804\H,0,2.493023,2.915716,1.495  
72\C,0,3.955231,0.641667,1.940599\H,0,4.828786,0.849378,1.320744\H,0,3  
.976438,1.350419,2.773238\H,0,4.074731,-0.356174,2.364315\C,0,1.475843  
,0.479406,2.095832\H,0,1.490003,1.160582,2.951676\H,0,0.514766,0.60974  
,1.598416\H,0,1.517769,-0.535414,2.494916\C,0,3.942218,0.044362,-1.574  
\H,0,3.724394,1.011006,-2.026924\H,0,4.941046,0.094147,-1.139872\H,0,3  
.964891,-0.694538,-2.375207\C,0,2.927842,-2.182116,0.282418\H,0,3.9248  
35,-2.289992,0.711079\H,0,2.213405,-2.499233,1.042167\H,0,2.857536,-2.  
881352,-0.551369\\Version=AM64L-G09RevC.01\State=1-A\HF=-1060.9025244\  
MP2=-1064.2092726\RMSD=2.036e-09\PG=C01 [X(C18H26O1Si1)]\@

5

1\1\GINC-IBLIS\SP\RMP2-FC\GTMP2large\C18H26O1Si1\LOCAL\28-Jul-2014\0\\  
#p MP2(FC)/GTMP2large scf=tight int=finegrid maxdisk=200GB\\Title Card  
Required\\0,1\C,0,1.914188,1.393291,0.688165\C,0,2.83043,2.395137,0.5  
24875\C,0,4.070632,2.141404,-0.089142\C,0,4.36302,0.882705,-0.529502\H  
,0,0.956977,1.607994,1.133265\H,0,2.597057,3.394032,0.865208\H,0,4.785  
151,2.942454,-0.213415\H,0,5.311113,0.675482,-1.007045\C,0,2.187698,0.  
073154,0.252616\C,0,3.44004,-0.176214,-0.373394\C,0,3.751103,-1.476896  
, -0.829252\C,0,2.857444,-2.494551,-0.674123\C,0,1.618012,-2.249301,-0.  
055372\C,0,1.27102,-1.008684,0.412255\H,0,4.707816,-1.649196,-1.303063  
\H,0,3.091333,-3.488853,-1.026587\H,0,0.920058,-3.068897,0.056023\C,0,  
-0.05409,-0.870041,1.133607\H,0,-0.612644,-1.788848,0.932185\C,0,0.125  
208,-0.766778,2.638503\H,0,0.655186,-1.639026,3.017693\H,0,0.69369,0.1  
20321,2.907385\H,0,-0.848688,-0.710052,3.122431\O,0,-0.802927,0.238431  
,0.699027\Si,0,-1.84308,0.336872,-0.604438\C,0,-3.615149,0.047726,0.01  
75\C,0,-3.708774,-1.310856,0.710723\H,0,-4.727056,-1.483911,1.071133\H  
,0,-3.462208,-2.134389,0.038749\H,0,-3.046785,-1.370287,1.575311\C,0,-  
4.596417,0.079702,-1.15335\H,0,-5.619668,-0.061272,-0.793842\H,0,-4.57  
1261,1.032381,-1.68456\H,0,-4.396964,-0.71156,-1.87706\C,0,-3.991219,1  
.139479,1.018686\H,0,-3.299893,1.171819,1.861246\H,0,-4.00231,2.127809  
,0.557988\H,0,-4.992692,0.958141,1.419895\C,0,-1.384248,-0.922161,-1.9  
16001\H,0,-1.514778,-1.952022,-1.583653\H,0,-2.00232,-0.785512,-2.8044



89\H,0,-0.343767,-0.804139,-2.217561\C,0,-1.631724,2.070941,-1.268999\  
H,0,-2.330953,2.28742,-2.077172\H,0,-1.78082,2.816229,-0.488208\H,0,-0  
.622074,2.201896,-1.658701\\Version=AM64L-G09RevC.01\State=1-A\HF=-106  
0.9016818\MP2=-1064.2085869\RMSD=2.205e-09\PG=C01 [X(C18H26O1Si1)]\\@

6

1\1\GINC-PHOBOBOS\SP\RMP2-FC\GTMP2large\C18H26O1Si1\ROOT\28-Jul-2014\0\  
#p MP2(FC)/GTMP2large scf=tight int=finegrid maxdisk=200GB\\Title Card  
Required\\0,1\C,0,1.814953,1.487916,0.525828\C,0,2.701851,2.444468,0.  
116018\C,0,3.853716,2.091914,-0.610827\C,0,4.088726,0.781573,-0.913279  
\H,0,0.92101,1.775351,1.053455\H,0,2.512595,3.483282,0.346487\H,0,4.54  
5444,2.857939,-0.930807\H,0,4.96795,0.497817,-1.475683\C,0,2.031938,0.  
117759,0.238837\C,0,3.194645,-0.232433,-0.50123\C,0,3.447524,-1.586968  
, -0.813722\C,0,2.583325,-2.561101,-0.411272\C,0,1.432771,-2.216471,0.3  
21724\C,0,1.144521,-0.918838,0.656183\H,0,4.336111,-1.835499,-1.377711  
\H,0,2.772484,-3.597117,-0.65294\H,0,0.758527,-3.003838,0.633285\C,0,-  
0.074595,-0.664101,1.517065\H,0,-0.656943,-1.589712,1.51101\C,0,0.3017  
17,-0.372258,2.961061\H,0,0.897746,0.534217,3.035517\H,0,-0.599462,-0.  
241567,3.558554\H,0,0.879944,-1.195854,3.377371\O,0,-0.861451,0.392125  
,1.02426\Si,0,-2.417495,0.355607,0.425683\C,0,-2.427063,-0.118927,-1.4  
1309\C,0,-2.004002,-1.576261,-1.59296\H,0,-2.008856,-1.841768,-2.65411  
8\H,0,-0.994531,-1.756887,-1.223011\H,0,-2.681521,-2.264794,-1.085854\  
C,0,-1.455074,0.779084,-2.177614\H,0,-1.737588,1.830984,-2.117493\H,0,  
-0.436633,0.686365,-1.801938\H,0,-1.444086,0.507164,-3.23704\C,0,-3.83  
4276,0.062699,-1.98296\H,0,-4.173281,1.097125,-1.916655\H,0,-3.850095,  
-0.215047,-3.040589\H,0,-4.569704,-0.564209,-1.475943\C,0,-3.042998,2.  
09958,0.67702\H,0,-4.080211,2.209364,0.360212\H,0,-2.987895,2.369207,1  
.731884\H,0,-2.444948,2.822419,0.122623\C,0,-3.450034,-0.849641,1.4307  
43\H,0,-4.489417,-0.834067,1.100059\H,0,-3.103555,-1.880218,1.354549\H  
,0,-3.442417,-0.574115,2.48598\\Version=AM64L-G09RevC.01\State=1-A\HF=  
-1060.9011584\MP2=-1064.2084999\RMSD=3.865e-09\PG=C01 [X(C18H26O1Si1)]  
\\@

7

1\1\GINC-PHOENIX\SP\RMP2-FC\GTMP2large\C18H26O1Si1\PASCAL\28-Jul-2014\  
0\\#p MP2(FC)/GTMP2large scf=tight int=finegrid maxdisk=200GB\\Title C  
ard Required\\0,1\C,0,-1.563982,-1.162077,-0.983471\C,0,-2.20027,-2.36  
4786,-1.118139\C,0,-3.466133,-2.571958,-0.540769\C,0,-4.063084,-1.5642  
19,0.161231\H,0,-0.584066,-1.034195,-1.414303\H,0,-1.724789,-3.165463,  
-1.666593\H,0,-3.959698,-3.526685,-0.651869\H,0,-5.034823,-1.712275,0.  
61251\C,0,-2.155308,-0.092753,-0.270849\C,0,-3.430848,-0.310047,0.3150  
87\C,0,-4.050053,0.731567,1.041147\C,0,-3.431986,1.938678,1.174488\C,0,  
-2.172259,2.157626,0.584484\C,0,-1.529121,1.181551,-0.127799\H,0,-5.0  
19948,0.554994,1.485692\H,0,-3.903915,2.736505,1.729776\H,0,-1.714866,  
3.127903,0.703362\C,0,-0.171639,1.423675,-0.753352\H,0,-0.197736,1.005  
695,-1.764762\C,0,0.2034,2.887036,-0.88437\H,0,-0.570824,3.444212,-1.4  
09581\H,0,0.36976,3.34159,0.09033\H,0,1.125242,2.983075,-1.454555\O,0,  
0.784754,0.722088,0.008398\Si,0,2.362905,0.328534,-0.351827\C,0,2.7861  
96,-1.068064,0.854966\C,0,2.667898,-0.55007,2.288348\H,0,2.882789,-1.3  
54089,2.998122\H,0,3.373881,0.256685,2.49024\H,0,1.664872,-0.180553,2.  
499519\C,0,4.211624,-1.564262,0.613289\H,0,4.454996,-2.363208,1.319034  
\H,0,4.340064,-1.97266,-0.390319\H,0,4.953871,-0.777185,0.752388\C,0,1  
.812962,-2.230069,0.664797\H,0,0.781837,-1.923321,0.832671\H,0,1.87877  
4,-2.658265,-0.336868\H,0,2.041686,-3.031883,1.372801\C,0,3.501864,1.7  
98804,-0.08607\H,0,3.314796,2.27587,0.87571\H,0,4.548447,1.491758,-0.1  
06097\H,0,3.376174,2.556147,-0.859637\C,0,2.492758,-0.217926,-2.144319  
\H,0,3.524617,-0.469604,-2.393341\H,0,1.880519,-1.093434,-2.360322\H,0  
,2.187532,0.575966,-2.8277\\Version=AM64L-G09RevC.01\State=1-A\HF=-106  
0.8989755\MP2=-1064.2055065\RMSD=8.219e-09\PG=C01 [X(C18H26O1Si1)]\\@

## REFERENCES

<sup>a</sup> P. Patschinski and H. Zipse,  
Department of Chemistry, LMU München,

Butenandtstrasse 5-13, D-81377 München, Germany  
Fax.: +49 89 2180 77738  
e-mail: zipse@cup.uni-muenchen.de

- [1] Schrödinger, LLC., MacroModel 9.7, 2009.
- [2] Gaussian 03, Revision D.01, M. J. Frisch et al. For full citation see:  
<http://www.gaussian.com>.
- [3] Gaussian 09, Revision C.01; M. J. Frisch et al. For full citation see:  
<http://www.gaussian.com>.
- [4] Hoops, S.; Sahle, S.; Gauges, R.; Lee, C.; Pahle, J.; Simus, N.; Singhal, M.;  
Xu, L.; Mendes, P. and Kummer, U. *Bioinformatics* **2006**, 22, 3067-3074.
